# Supplementary material for: Error-Corrected Deep Targeted Sequencing of Circulating Cell-Free DNA from Colorectal Cancer Patients for Sensitive Detection of Circulating Tumor DNA
Source: Int J Mol Sci. 2024 Apr 11;25(8):4252. doi: 10.3390/ijms25084252 (PMC11049993; doi:10.3390/ijms25084252)
Supplement: Supplementary file 1 [file ijms-25-04252-s001.zip › ijms-2931276-supplementary.xlsx]

## Sheet: Table S1
Table S1.
Association of pT and pN category with ctDNA detection
	OR (95% CI)	p-value
pT1	-	-
pT2	3.41 (1.45; 8.58)	6.48e-03
pT3	8.80 (3.84; 21.73)	6.92e-07
pT4	20.24 (5.00; 108.78)	9.32e-05
pN0	-	-
pN1	0.71 (0.36; 1.45)	3.37e-01
pN2	0.68 (0.26; 1.95)	4.50e-01
Association of Tumor size, pT, pN category with ctDNA detection
	OR (95% CI)	p-value
pT1	-	-
pT2	1.96 (0.76; 5.39)	1.76e-01
pT3	2.48 (0.89; 7.27)	8.63e-02
pT4	7.55 (1.37; 62.52)	3.21e-02
pN0	-	-
pN1	0.98 (0.48; 2.08)	9.54e-01
pN2	0.89 (0.31; 2.84)	8.43e-01
tumor size	1.04 (1.02; 1.06)	5.85e-05
Odd ratio estimates from a multivariable logistic model predicting ctDNA status (positive or negative) from the categorical exposure variables pT and pN using training and validation samples (n = 358).
Seven samples from metastatic patients were excluded from the analysis.
As above, but including tumor size (longest diameter) as a linear variable in units of 10 cm

## Sheet: Table S2
Table S2 Capture panel definition (Hg38)
Region	Chromosome	Start	Stop	Size (bp)	Type
APC	chr5	112780699	112781011	313	CORE
APC	chr5	112792319	112792644	326	CORE
APC	chr5	112801214	112801414	201	CORE
APC	chr5	112815384	112815658	275	CORE
APC	chr5	112819104	112819434	331	CORE
APC	chr5	112826999	112827316	318	CORE
APC	chr5	112827829	112828031	203	CORE
APC	chr5	112828754	112829081	328	CORE
APC	chr5	112834864	112835108	245	CORE
APC	chr5	112837419	112840443	3025	CORE
APC	chr5	112840744	112840984	241	CORE
BRAF	chr7	140753212	140753464	253	CORE
FAM123B	chrX	64191239	64191626	388	CORE
FAM123B	chrX	64191954	64192094	141	CORE
FAM123B	chrX	64192139	64192353	215	CORE
FBXW7	chr4	152324113	152324436	324	CORE
FBXW7	chr4	152325968	152326244	277	CORE
FBXW7	chr4	152326273	152326338	66	CORE
FBXW7	chr4	152328108	152328446	339	CORE
KRAS	chr12	25225504	25225843	340	CORE
KRAS	chr12	25227184	25227467	284	CORE
KRAS	chr12	25245199	25245483	285	CORE
NRAS	chr1	114713777	114714014	238	CORE
NRAS	chr1	114715992	114716239	248	CORE
PIK3CA	chr3	179198931	179199247	317	CORE
PIK3CA	chr3	179203626	179203917	292	CORE
PIK3CA	chr3	179218166	179218433	268	CORE
PIK3CA	chr3	179234161	179234430	270	CORE
SMAD2	chr18	47841718	47841958	241	CORE
SMAD2	chr18	47848378	47848698	321	CORE
SMAD4	chr18	51065384	51065673	290	CORE
SMAD4	chr18	51078209	51078516	308	CORE
SOX9	chr17	72123467	72124262	796	CORE
TCF7L2	chr10	113141129	113141434	306	CORE
TCF7L2	chr10	113152254	113152542	289	CORE
TCF7L2	chr10	113157894	113158137	244	CORE
TCF7L2	chr10	113165429	113165705	277	CORE
TP53	chr17	7670551	7670845	295	CORE
TP53	chr17	7673406	7673927	522	CORE
TP53	chr17	7674056	7674351	296	CORE
TP53	chr17	7674761	7675365	605	CORE
TP53	chr17	7675871	7676194	324	CORE
IDSNP01	chr1	187641648	187641793	146	IDSNP
IDSNP02	chr5	52897381	52897528	148	IDSNP
IDSNP03	chr10	16504977	16505132	156	IDSNP
IDSNP04	chr8	144439940	144440088	149	IDSNP
IDSNP05	chr14	22052713	22052869	157	IDSNP
IDSNP06	chr5	176529433	176529591	159	IDSNP
IDSNP07	chr8	98021021	98021162	142	IDSNP
IDSNP08	chr17	2364760	2364919	160	IDSNP
IDSNP09	chr3	105533456	105533594	139	IDSNP
IDSNP10	chr19	1488066	1488211	146	IDSNP
IDSNP11	chr11	47835625	47835760	136	IDSNP
IDSNP12	chr14	104940618	104940773	156	IDSNP
IDSNP13	chr1	40738822	40738964	143	IDSNP
IDSNP14	chr11	33043777	33043913	137	IDSNP
IDSNP15	chr7	4860379	4860530	152	IDSNP
IDSNP16	chr1	118101729	118101869	141	IDSNP
IDSNP17	chrX	49236990	49237130	141	IDSNP
IDSNP18	chrY	10174188	10174308	121	IDSNP

## Sheet: Table S3
Table S3 Definition of variant types used for UMIseq
Variant type	Definition	Example
Single-nucleotide substitution (SNV)	Ref = 1 nucleotide	A > T
	Alt = 1 nucleotide
Insertion	Ref = 1 nucleotide	A > AAT
	Alt > 1 nucleotide
Deletion	Ref > 1 nucleotide	AAT > A
	Alt = 1 nucleotide
Multi-nucleotide variant (MNV)	Ref > 1 nucleotide	ATG > GTC
	Alt > 1 nucleotide	ATCG > AG
Phased variant	Annotated according to Mutect2 (two or more of the above variants present in the same read)	-
Ref	Reference base
Alt	Alternative mutated base

## Sheet: Table S4
Table S4 NGS sequencing quality metrics
Key:
total_reads: Total number of reads, including duplicated and not properly paired
unique_reads: Number of unique, properly aligned and mapable reads after de-duplication (WES and WGS) or UMI consensus collapse (UMIseq and DuplexSeq)
unique_bases: Number of bases in unique_reads
min_target_depth,median_target_depth,max_target_depth: Minimum, median and maximum unique depth across target - defined as the genome (WGS; size 2,934 MB), exome (WES; size 33.17 MB) or CRC CORE (UMIseq and DuplexSeq; size 0.015 MB)
pct_10x,pct_100x,pct_1000x: Percentage of target with at least 10 (WGS, WES and DuplexSeq only), 100 and 1000 (UMIseq only) unique reads
id	method	dna_source	total_reads	unique_reads	unique_bases	min_target_depth	median_target_depth	max_target_depth	pct_10x	pct_100x	pct_1000x
S001	UMIseq	cfdna	20298850	967362	91657159	189	2795	3856	NA	100	98.2994
S002	UMIseq	cfdna	66793289	5098450	514993035	723	16408	25631	NA	100	99.9871
S004	UMIseq	cfdna	47684681	5719042	559699989	834	18529	25184	NA	100	99.9871
S006	UMIseq	cfdna	67182455	3517334	350941980	380	10874	18864	NA	100	99.8707
S007	UMIseq	cfdna	48882766	7182721	635822767	357	20110	34871	NA	100	99.9483
S008	UMIseq	cfdna	13570894	1401623	151824973	308	4665	7197	NA	100	99.709
S011	UMIseq	cfdna	29830276	3288168	313812761	238	9475	13376	NA	100	99.7995
S014	UMIseq	cfdna	38045755	4095580	390431820	503	11671	16786	NA	100	99.9224
S016	UMIseq	cfdna	149514660	16065571	1397978275	403	47513	69561	NA	100	99.9806
S017	UMIseq	cfdna	58545678	7058430	706145517	1013	24992	32906	NA	100	100
S018	UMIseq	cfdna	59140616	7843773	729370569	370	20560	32191	NA	100	99.9289
S020	UMIseq	cfdna	49254412	4381018	419230564	385	12880	23386	NA	100	99.8771
S021	UMIseq	cfdna	9642893	1114324	108036564	101	3461	5377	NA	100	98.6809
S025	UMIseq	cfdna	11502329	846264	79647543	60	2215	4598	NA	99.9418	95.6288
S026	UMIseq	cfdna	43967273	4559548	448686855	59	13461	34370	NA	99.5926	93.7536
S029	UMIseq	cfdna	52276124	5172119	461472860	132	12800	27765	NA	100	99.8189
S030	UMIseq	cfdna	36247246	3129114	322555764	527	11186	17798	NA	100	99.9741
S032	UMIseq	cfdna	11913398	1587651	148336071	84	4004	7799	NA	99.9935	99.3081
S034	UMIseq	cfdna	25463864	1992654	192546922	366	5744	9651	NA	100	99.7543
S035	UMIseq	cfdna	21893772	2836634	278446461	381	9628	13133	NA	100	99.9159
S036	UMIseq	cfdna	22420349	2637057	242979401	89	6393	13263	NA	99.9871	99.6508
S037	UMIseq	cfdna	191602090	20354125	1723562454	402	56061	76529	NA	100	99.9741
S038	UMIseq	cfdna	115520639	6817979	691753453	1046	21716	35998	NA	100	100
S040	UMIseq	cfdna	31831220	2897468	292060901	640	9862	14405	NA	100	99.9806
S041	UMIseq	cfdna	115544295	15223842	1405044227	1901	44415	65603	NA	100	100
S044	UMIseq	cfdna	32758752	1590672	151572241	117	4450	5924	NA	100	98.9331
S045	UMIseq	cfdna	35456151	2481082	241577861	260	7439	14083	NA	100	99.7414
S048	UMIseq	cfdna	26391011	2975782	287647436	480	9476	13449	NA	100	99.9353
S049	UMIseq	cfdna	22238256	1101898	109192530	239	3619	4916	NA	100	99.528
S050	UMIseq	cfdna	43694598	2630602	275357998	576	8734	13501	NA	100	99.9677
S053	UMIseq	cfdna	28833514	2524043	235092803	116	6283	11801	NA	100	99.6185
S054	UMIseq	cfdna	47508088	3064668	293997466	345	9180	13514	NA	100	99.8707
S055	UMIseq	cfdna	34427752	4025368	362539822	157	11349	18245	NA	100	99.8189
S059	UMIseq	cfdna	34268538	2104080	199820367	92	5712	7686	NA	99.9871	99.4116
S060	UMIseq	cfdna	83334992	4557535	464691709	536	16420	22641	NA	100	99.9741
S063	UMIseq	cfdna	7904793	867980	77974283	85	2303	4028	NA	99.9806	96.3531
S066	UMIseq	cfdna	73744980	4807138	472632254	664	15091	20543	NA	100	99.9741
S069	UMIseq	cfdna	138205572	11525793	1024723134	290	31744	56623	NA	100	99.9289
S072	UMIseq	cfdna	81854665	7820700	763968655	786	22874	32499	NA	100	99.9871
S073	UMIseq	cfdna	36132070	2601072	253711900	338	8255	10300	NA	100	99.8513
S074	UMIseq	cfdna	58361772	6092198	608337898	959	21100	30581	NA	100	99.9935
S075	UMIseq	cfdna	65834176	4962541	491258491	556	16103	20944	NA	100	99.9741
S077	UMIseq	cfdna	62074307	4726882	486171150	846	15385	25663	NA	100	99.9935
S079	UMIseq	cfdna	51832631	3983124	367725595	298	10614	13986	NA	100	99.8577
S081	UMIseq	cfdna	29468219	4728280	482951187	861	16524	20718	NA	100	99.9935
S086	UMIseq	cfdna	39057678	6413792	587883655	294	17628	28590	NA	100	99.903
S087	UMIseq	cfdna	62399932	5759834	526956715	260	16383	23203	NA	100	99.9289
S088	UMIseq	cfdna	127272595	14772930	1295279415	402	43413	67317	NA	100	99.9612
S089	UMIseq	cfdna	36898977	3912898	378418389	616	12018	16723	NA	100	99.9741
S090	UMIseq	cfdna	50247798	4486499	427820786	546	13747	20282	NA	100	99.9483
S095	UMIseq	cfdna	42585606	4349581	413813739	276	12548	20523	NA	100	99.8513
S097	UMIseq	cfdna	68896342	6826601	654905539	456	19260	25057	NA	100	99.9289
S100	UMIseq	cfdna	31388145	3980380	386819782	431	13006	17299	NA	100	99.9095
S103	UMIseq	cfdna	34277307	3334363	313816592	157	9209	14824	NA	100	99.7543
S107	UMIseq	cfdna	165342927	24648438	2158579633	544	67287	87408	NA	100	99.9806
S117	UMIseq	cfdna	30213587	3066107	287994411	570	9090	13887	NA	100	99.9353
S118	UMIseq	cfdna	101613070	11879609	1050575816	310	32483	42543	NA	100	99.9353
S119	UMIseq	cfdna	67249700	7722040	696665463	366	21156	30525	NA	100	99.9418
S120	UMIseq	cfdna	21886064	2246742	210868665	192	6378	11064	NA	100	99.6896
S121	UMIseq	cfdna	90246428	12378836	1105655711	437	33908	43718	NA	100	99.9547
S122	UMIseq	cfdna	36076840	3432124	355889872	36	11144	28593	NA	98.6421	94.7365
S123	UMIseq	cfdna	109984348	10595266	971697836	519	30545	46138	NA	100	99.9418
S129	UMIseq	cfdna	141280489	24117334	2055713619	355	70900	94741	NA	100	99.9741
S136	UMIseq	cfdna	69751459	10376524	921587152	412	30373	42941	NA	100	99.9289
S138	UMIseq	cfdna	27164093	3726306	355907010	256	10845	17477	NA	100	99.8254
S139	UMIseq	cfdna	107663342	14214302	1300719545	627	39450	59167	NA	100	99.9677
S140	UMIseq	cfdna	31933177	3479294	324744442	324	9878	13070	NA	100	99.8707
S142	UMIseq	cfdna	60143076	6505436	670641388	1147	23065	30649	NA	100	100
S144	UMIseq	cfdna	44454862	2084660	187100326	57	5065	7359	NA	99.9741	99.2305
S145	UMIseq	cfdna	40029842	3817750	360399324	366	10243	18377	NA	100	99.8383
S152	UMIseq	cfdna	8862949	786442	72613514	98	2064	3170	NA	99.9935	96.3919
S153	UMIseq	cfdna	41685147	6745660	663815020	589	17989	38828	NA	100	99.9741
S154	UMIseq	cfdna	57121362	6744174	623751236	542	18507	23980	NA	100	99.9289
S156	UMIseq	cfdna	53128589	3810628	386164902	534	12831	20254	NA	100	99.9612
S158	UMIseq	cfdna	46771909	5896623	529530007	122	16936	27920	NA	100	99.8513
S159	UMIseq	cfdna	35767461	4901208	480010575	701	16025	21189	NA	100	99.9806
S160	UMIseq	cfdna	48369826	1693147	160185580	8	4221	10117	NA	99.8836	94.0899
S161	UMIseq	cfdna	40687333	4690710	442855580	365	12994	20235	NA	100	99.8965
S164	UMIseq	cfdna	14148558	997082	95453812	150	3161	4534	NA	100	99.2305
S165	UMIseq	cfdna	104640704	6484818	656283580	1056	20738	34747	NA	100	100
S166	UMIseq	cfdna	106988681	13594612	1187112536	401	38409	64553	NA	100	99.9483
S174	UMIseq	cfdna	19175247	2230988	207644005	71	5902	10002	NA	99.9741	99.3534
S177	UMIseq	cfdna	26898508	2321895	216876777	151	6615	9124	NA	100	99.6508
S178	UMIseq	cfdna	174313204	5690443	531489056	368	14718	23386	NA	100	99.9159
S180	UMIseq	cfdna	160673500	11187728	1044142760	447	28478	41260	NA	100	99.9353
S182	UMIseq	cfdna	33470920	3652125	341734005	178	9648	14968	NA	100	99.7414
S184	UMIseq	cfdna	65399946	5534169	508701240	283	15593	25907	NA	100	99.903
S186	UMIseq	cfdna	40761581	4508577	386780178	134	12719	17977	NA	100	99.8577
S188	UMIseq	cfdna	12495250	1002216	96726684	126	3138	4304	NA	100	99.1465
S192	UMIseq	cfdna	91744385	9043062	901637214	1362	29901	41057	NA	100	100
S193	UMIseq	cfdna	58491798	2572374	255959526	330	8700	11774	NA	100	99.8577
S197	UMIseq	cfdna	23685273	1160803	109089035	66	2827	5389	NA	99.9547	98.1636
S198	UMIseq	cfdna	37706711	2424346	234450815	194	7139	9715	NA	100	99.6638
S203	UMIseq	cfdna	61413792	4861809	424590391	472	12504	18085	NA	100	99.9289
S204	UMIseq	cfdna	32987101	3076993	301294983	441	10262	13558	NA	100	99.9289
S206	UMIseq	cfdna	154933827	11127712	1111332629	1862	34818	54904	NA	100	100
S209	UMIseq	cfdna	36643111	1179724	113604328	124	3296	4616	NA	100	99.0495
S210	UMIseq	cfdna	81793513	6959578	659099972	807	20505	29215	NA	100	99.9871
S211	UMIseq	cfdna	NA	5137607	444043839	167	13047	25238	NA	100	99.8577
S212	UMIseq	cfdna	32227786	3933415	356375225	130	10481	16665	NA	100	99.7478
S213	UMIseq	cfdna	53044743	3869011	362591029	413	10257	14389	NA	100	99.8901
S218	UMIseq	cfdna	42048796	5052473	466292045	328	14241	23291	NA	100	99.8707
S223	UMIseq	cfdna	125445977	5653752	559572108	538	16711	23503	NA	100	99.9806
S224	UMIseq	cfdna	37802358	4355538	429581040	672	14707	19411	NA	100	99.9612
S228	UMIseq	cfdna	52232358	4943948	483330799	738	15119	22578	NA	100	99.9871
S229	UMIseq	cfdna	78218717	9831214	928990449	767	30191	41032	NA	100	99.9806
S235	UMIseq	cfdna	11066985	1764358	175048651	231	6005	8024	NA	100	99.7349
S236	UMIseq	cfdna	52810957	3483929	323058399	160	8631	16747	NA	100	99.7349
S237	UMIseq	cfdna	23170859	969786	91735463	88	2719	3987	NA	99.9871	97.6657
S239	UMIseq	cfdna	20965590	4214856	435870023	591	14981	18401	NA	100	99.709
S241	UMIseq	cfdna	20130197	3802790	372191696	637	11564	19180	NA	100	99.9289
S246	UMIseq	cfdna	7175600	979894	95305830	134	2971	6852	NA	100	98.2024
S248	UMIseq	cfdna	85591580	3110740	300158846	306	7920	14111	NA	100	99.7931
S250	UMIseq	cfdna	32475102	2588361	255311657	370	8590	15593	NA	100	99.8707
S251	UMIseq	cfdna	227785380	24241903	2148634653	511	67823	99102	NA	100	99.9806
S252	UMIseq	cfdna	28453860	2227846	230020912	402	7291	10526	NA	100	99.8965
S254	UMIseq	cfdna	78413732	11793077	1107653509	607	32522	44492	NA	100	99.9612
S258	UMIseq	cfdna	6344668	845958	75829753	43	2256	4375	NA	99.9483	93.4885
S260	UMIseq	cfdna	23089685	2193541	217231959	308	7490	10627	NA	100	99.7995
S263	UMIseq	cfdna	20218864	919884	91124479	101	2966	4118	NA	100	98.3511
S264	UMIseq	cfdna	27680401	3324642	320159041	306	9902	13630	NA	100	99.8448
S267	UMIseq	cfdna	44209992	3884512	379437721	436	11680	16673	NA	100	99.903
S268	UMIseq	cfdna	205504349	14450058	1428838731	1925	41940	57800	NA	100	100
S274	UMIseq	cfdna	171270799	8126706	811101816	827	24835	33597	NA	100	99.9935
S275	UMIseq	cfdna	17568589	1491234	137332693	116	4169	7732	NA	100	99.1982
S277	UMIseq	cfdna	28022735	3321671	304120979	137	9407	14883	NA	100	99.7478
S278	UMIseq	cfdna	23266713	4008288	402541825	601	13949	20519	NA	100	99.9741
S279	UMIseq	cfdna	8546109	482772	46841001	84	1499	2167	NA	99.9806	93.2363
S281	UMIseq	cfdna	47264215	2404231	219110564	122	6384	8949	NA	100	99.5668
S282	UMIseq	cfdna	48221171	4784948	440759901	195	13154	17183	NA	100	99.8513
S283	UMIseq	cfdna	34862008	3861388	367591533	300	10837	15509	NA	100	99.8771
S285	UMIseq	cfdna	66456105	8816979	841479061	888	25026	35511	NA	100	99.9871
S288	UMIseq	cfdna	48940147	5188311	469157020	181	14322	23810	NA	100	99.8383
S289	UMIseq	cfdna	55927607	4176794	407449708	411	12599	18252	NA	100	99.903
S291	UMIseq	cfdna	19007117	2016978	191923102	142	5360	12128	NA	100	99.5668
S304	UMIseq	cfdna	10541990	566476	54675409	105	1813	2824	NA	100	92.0401
S306	UMIseq	cfdna	13964964	2155804	212494300	421	6818	13429	NA	100	99.8189
S311	UMIseq	cfdna	10311234	1621274	168386757	345	5288	7599	NA	100	99.7478
S314	UMIseq	cfdna	90060154	12016689	1135384437	743	34209	50512	NA	100	99.9806
S316	UMIseq	cfdna	68418145	8774838	790878386	366	21983	45181	NA	100	99.9289
S321	UMIseq	cfdna	17445172	760679	67317145	8	1826	4974	NA	99.722	75.8875
S322	UMIseq	cfdna	43276436	4190866	392783115	336	11862	16759	NA	100	99.8836
S323	UMIseq	cfdna	76146996	8798768	831068390	504	23556	35803	NA	100	99.9353
S326	UMIseq	cfdna	122431155	9199628	909652962	1356	28993	40880	NA	100	100
S328	UMIseq	cfdna	87555573	4602267	434178635	221	11857	16871	NA	100	99.8513
S329	UMIseq	cfdna	98797055	9567852	909765780	523	25440	40246	NA	100	99.9418
S332	UMIseq	cfdna	16635190	768742	73650844	132	2307	3757	NA	100	97.614
S334	UMIseq	cfdna	46952706	4980189	466094026	258	13923	18526	NA	100	99.903
S336	UMIseq	cfdna	186222724	19625200	1758734477	575	55397	71610	NA	100	99.9806
S338	UMIseq	cfdna	27746055	5192818	507751257	503	16311	23295	NA	100	99.9741
S339	UMIseq	cfdna	112491098	10179597	863979899	270	26076	56677	NA	100	99.9483
S341	UMIseq	cfdna	15873000	1612542	155405393	197	4781	7599	NA	100	99.515
S345	UMIseq	cfdna	36263000	3493739	336040286	391	10628	13270	NA	100	99.903
S347	UMIseq	cfdna	4840130	700854	66939368	112	2145	2788	NA	100	97.0579
S348	UMIseq	cfdna	15950217	2079178	205245540	276	7116	10374	NA	100	99.8189
S350	UMIseq	cfdna	23343064	2893765	270049777	207	7972	11549	NA	100	99.7026
S351	UMIseq	cfdna	101924742	14520022	1160359946	171	43816	61431	NA	100	99.9418
S353	UMIseq	cfdna	73045571	7584685	650597024	185	18055	49425	NA	100	99.9159
S354	UMIseq	cfdna	52987236	1981150	174312665	93	4580	9418	NA	99.9935	99.5603
S357	UMIseq	cfdna	20858944	5560876	522405372	254	16725	24438	NA	100	99.9095
S361	UMIseq	cfdna	25552232	3282389	299265534	169	9198	14169	NA	100	99.7478
S362	UMIseq	cfdna	59703084	2002574	195563576	180	5545	7894	NA	100	99.6185
S364	UMIseq	cfdna	18525141	1939448	194033097	141	6632	15812	NA	100	92.7384
S365	UMIseq	cfdna	47299998	3583798	331933651	122	10330	16379	NA	100	99.7608
S367	UMIseq	cfdna	86750909	5746831	512972158	205	14833	24310	NA	100	99.903
S368	UMIseq	cfdna	39886745	3762802	373203422	556	13179	16854	NA	100	99.9741
S369	UMIseq	cfdna	NA	8774529	871250744	1152	27271	43374	NA	100	100
S370	UMIseq	cfdna	44512210	2803328	271343791	369	8489	12022	NA	100	99.8577
S373	UMIseq	cfdna	21480004	2154340	209559132	312	6938	8647	NA	100	99.7478
S374	UMIseq	cfdna	19610823	2904810	277873406	315	9067	12509	NA	100	99.8383
S376	UMIseq	cfdna	147713550	14275798	1229756749	406	40003	57428	NA	100	99.9547
S379	UMIseq	cfdna	64716610	6328026	633045545	991	20475	33668	NA	100	99.9935
S380	UMIseq	cfdna	77219154	7653715	752635167	1182	26291	34239	NA	100	100
S381	UMIseq	cfdna	126556045	7593804	649835090	145	21002	36874	NA	100	99.9159
S382	UMIseq	cfdna	43501158	3489786	315867632	179	9249	12284	NA	100	99.7543
S386	UMIseq	cfdna	69333520	6479550	612491289	411	18299	25247	NA	100	99.9289
S392	UMIseq	cfdna	41052435	5437053	493546197	385	15506	24156	NA	100	99.9095
S393	UMIseq	cfdna	43679793	4011254	414671826	848	13086	23104	NA	100	99.9935
S394	UMIseq	cfdna	21432537	2129062	221300069	361	7551	11744	NA	100	99.8513
S395	UMIseq	cfdna	26038958	3091585	254505219	52	8258	16479	NA	99.9806	99.6896
S397	UMIseq	cfdna	33111833	3819323	368477636	486	11643	16854	NA	100	99.9159
S398	UMIseq	cfdna	21394951	3224470	305094900	385	9525	14219	NA	100	99.8642
S401	UMIseq	cfdna	13014163	1195408	126241474	237	4231	6049	NA	100	99.5086
S404	UMIseq	cfdna	37837964	3062764	297753077	307	9356	14674	NA	100	99.8319
S406	UMIseq	cfdna	17394180	4155749	393499298	446	12281	17562	NA	100	99.9095
S409	UMIseq	cfdna	66687609	5019516	498995867	845	16691	26305	NA	100	99.9871
S410	UMIseq	cfdna	26074736	2462412	223498005	196	7005	10347	NA	100	99.7026
S412	UMIseq	cfdna	58289737	5652956	546576531	434	15068	22895	NA	100	99.9159
S415	UMIseq	cfdna	61887103	4099996	423620298	748	13680	19482	NA	100	99.9806
S417	UMIseq	cfdna	95261580	8285450	808378060	811	25220	32177	NA	100	99.9806
S418	UMIseq	cfdna	55517192	6370188	634987808	862	19825	31434	NA	100	99.9935
S420	UMIseq	cfdna	100932923	8145723	684055090	583	21986	30572	NA	100	99.9741
S423	UMIseq	cfdna	21862166	799828	78382522	8	2319	6289	NA	99.8189	86.1752
S424	UMIseq	cfdna	43922880	1187004	118682085	214	3485	6402	NA	100	99.5474
S426	UMIseq	cfdna	12953555	1233270	105911824	108	3035	5149	NA	100	98.6874
S428	UMIseq	cfdna	52002824	3424725	318601361	203	8710	12862	NA	100	99.7672
S430	UMIseq	cfdna	123956148	12807824	1091472803	178	34419	57020	NA	100	99.9353
S431	UMIseq	cfdna	8727835	1157384	110134897	141	3568	4984	NA	100	98.7003
S432	UMIseq	cfdna	96870612	11458622	1039539688	333	31151	45825	NA	100	99.9224
S439	UMIseq	cfdna	23038730	1407776	138628947	199	4503	6835	NA	100	99.5086
S443	UMIseq	cfdna	17080638	2458792	240981684	282	7885	10431	NA	100	99.7995
S445	UMIseq	cfdna	184596793	18677448	1555160924	453	53620	95376	NA	100	99.9806
S446	UMIseq	cfdna	9624899	824926	74563721	35	2196	3916	NA	99.9547	94.5942
S451	UMIseq	cfdna	30300683	3199060	308731270	318	10084	13417	NA	100	99.8707
S452	UMIseq	cfdna	40733383	4301222	429079926	609	14099	19282	NA	100	99.9741
S454	UMIseq	cfdna	21804226	5188766	487618111	279	15494	23754	NA	100	99.8965
S461	UMIseq	cfdna	15303130	2696501	243546505	76	7262	15565	NA	99.9806	99.3857
S462	UMIseq	cfdna	148907166	17340521	1525021109	422	45410	76378	NA	100	99.9741
S463	UMIseq	cfdna	47975441	4685905	446162450	270	12325	18641	NA	100	99.8707
S464	UMIseq	cfdna	30297541	3509647	327719767	179	9153	16493	NA	100	99.7478
S465	UMIseq	cfdna	240417929	21124776	1969116766	483	61720	82300	NA	100	99.9806
S466	UMIseq	cfdna	17572686	1720138	172687104	17	5050	15300	NA	96.1397	88.9557
S467	UMIseq	cfdna	46772936	2740828	266963249	422	9016	12132	NA	100	99.903
S471	UMIseq	cfdna	25287537	2204896	226784833	368	7531	11383	NA	100	99.8707
S472	UMIseq	cfdna	42010495	2890114	268506228	229	7158	13948	NA	100	99.7801
S473	UMIseq	cfdna	8345925	1167535	107516795	110	3167	4888	NA	100	98.8231
S474	UMIseq	cfdna	42798772	4039887	390968726	394	11376	21632	NA	100	99.8901
S476	UMIseq	cfdna	10399350	1409950	130582197	148	3868	5687	NA	100	98.8749
S481	UMIseq	cfdna	45555403	3839092	400116656	94	13101	31915	NA	99.9806	95.5383
S482	UMIseq	cfdna	43947237	2670449	254780780	156	7141	9308	NA	100	99.6444
S485	UMIseq	cfdna	15265716	1497376	149797572	229	5032	7156	NA	100	99.5732
S486	UMIseq	cfdna	23910377	2161294	204769577	207	6605	9484	NA	100	99.6508
S487	UMIseq	cfdna	56448028	4831143	458819767	261	12551	21246	NA	100	99.903
S489	UMIseq	cfdna	24620983	2623002	234421889	112	7345	11064	NA	100	99.6056
S493	UMIseq	cfdna	43014697	7887032	795204212	1069	27734	49874	NA	100	100
S496	UMIseq	cfdna	25085550	1261568	124459976	343	3790	6225	NA	100	99.7155
S500	UMIseq	cfdna	36093017	2192633	217715752	283	7291	11445	NA	100	99.7737
S501	UMIseq	cfdna	22707087	3107861	297597362	226	9054	13791	NA	100	99.7995
S504	UMIseq	cfdna	40181179	1379134	130072855	89	3563	6057	NA	99.9806	98.6615
S506	UMIseq	cfdna	52239410	3735657	360416560	507	11343	16912	NA	100	99.9159
S507	UMIseq	cfdna	18025383	3241419	295102958	102	9133	13825	NA	100	99.7414
S508	UMIseq	cfdna	71772366	7464490	746463463	1167	23969	39109	NA	100	100
S509	UMIseq	cfdna	28931626	2160376	223467437	337	6738	12012	NA	100	99.8901
S515	UMIseq	cfdna	76531298	9493321	852067392	400	23897	46056	NA	100	99.9418
S516	UMIseq	cfdna	47503057	NA	NA	1042	18402	27706	NA	100	100
S517	UMIseq	cfdna	37695025	3545461	321434454	169	9659	16392	NA	100	99.7866
S518	UMIseq	cfdna	48333352	7317830	648746606	276	20802	27547	NA	100	99.9418
S520	UMIseq	cfdna	54024023	7968570	779345627	871	23594	45763	NA	100	99.9871
S523	UMIseq	cfdna	106248422	6666400	551004365	53	19314	28807	NA	99.9806	99.8642
S525	UMIseq	cfdna	24788138	2617210	244778527	130	6716	12431	NA	100	99.6702
S530	UMIseq	cfdna	84365141	4637658	445165924	696	14175	19980	NA	100	99.9418
S531	UMIseq	cfdna	59204454	7840370	745825004	663	20804	41809	NA	100	99.9353
S532	UMIseq	cfdna	21558072	925472	90813489	189	2931	4075	NA	100	98.8361
S533	UMIseq	cfdna	NA	3123790	312692303	409	9607	15313	NA	100	99.9612
S534	UMIseq	cfdna	126531306	12297074	1074342471	249	34740	62499	NA	100	99.9289
S535	UMIseq	cfdna	36865182	3731726	364924072	464	11521	17292	NA	100	99.9353
S537	UMIseq	cfdna	95448417	14737144	1390140850	897	41703	57436	NA	100	99.9871
S538	UMIseq	cfdna	40704562	3353013	327780877	524	10839	14209	NA	100	99.9418
S542	UMIseq	cfdna	9894506	1266938	129543462	223	4269	6495	NA	100	98.752
S544	UMIseq	cfdna	20352580	2225232	210403133	99	5802	10809	NA	99.9935	99.528
S547	UMIseq	cfdna	19496708	2057980	204937257	304	6894	10141	NA	100	99.7995
S548	UMIseq	cfdna	66500166	9557794	928364198	1098	28364	50633	NA	100	100
S549	UMIseq	cfdna	49329996	3515668	330457999	206	9107	14254	NA	100	99.7478
S557	UMIseq	cfdna	58835405	3046396	293382232	199	8072	10911	NA	100	99.6896
S560	UMIseq	cfdna	15974468	1784478	174484120	217	5748	8396	NA	100	99.6896
S564	UMIseq	cfdna	28718340	3100350	287489153	164	8167	15742	NA	100	99.6896
S565	UMIseq	cfdna	66516147	8935473	761957292	164	22711	48874	NA	100	99.9289
S567	UMIseq	cfdna	8964981	854752	84308693	83	2992	4840	NA	99.9935	98.4028
S569	UMIseq	cfdna	58163485	7961181	723508154	274	21277	33568	NA	100	99.9159
S570	UMIseq	cfdna	50136943	6835352	605431217	328	19442	31513	NA	100	99.9224
S571	UMIseq	cfdna	16710947	884271	74244312	93	2363	4283	NA	99.9935	96.0556
S572	UMIseq	cfdna	72694051	8553718	815750632	601	24094	35109	NA	100	99.9741
S573	UMIseq	cfdna	10353692	1000866	91742654	49	2685	3847	NA	99.9612	97.9437
S578	UMIseq	cfdna	23889725	2386206	248261613	396	8195	12138	NA	100	99.8901
S580	UMIseq	cfdna	46002112	3752402	389258316	657	13525	21029	NA	100	99.9741
S583	UMIseq	cfdna	28835963	3811434	370234505	786	12576	22013	NA	100	99.9871
S586	UMIseq	cfdna	94094675	6611315	592768019	147	16564	33153	NA	100	99.8836
S590	UMIseq	cfdna	31145504	3221449	325569004	554	10267	18287	NA	100	99.9612
S593	UMIseq	cfdna	20033524	2052669	199878799	453	6544	9332	NA	100	99.9224
S594	UMIseq	cfdna	35753745	2703090	255817469	169	7080	13512	NA	100	99.6573
S596	UMIseq	cfdna	35635271	2462210	234089295	267	6582	11319	NA	100	99.7414
S598	UMIseq	cfdna	38519695	4707673	454276062	261	13088	23326	NA	100	99.8901
S602	UMIseq	cfdna	7722591	518530	44079261	79	1314	3079	NA	99.9741	78.461
S605	UMIseq	cfdna	50782991	2091394	194880407	126	5522	7116	NA	100	99.5215
S607	UMIseq	cfdna	33800364	4127982	386850415	328	10266	27629	NA	100	99.8642
S608	UMIseq	cfdna	14713249	1171346	113295128	245	3371	4845	NA	100	99.14
S609	UMIseq	cfdna	2773493	195246	18324626	5	569	814	NA	99.2305	0
S611	UMIseq	cfdna	33283056	2736020	258193189	433	7685	11900	NA	100	99.8771
S612	UMIseq	cfdna	29332447	4882836	486524752	862	15910	19713	NA	100	99.9935
S615	UMIseq	cfdna	34699601	4508712	437896754	937	14805	22556	NA	100	99.9935
S616	UMIseq	cfdna	50965063	6488408	597968804	249	18058	25283	NA	100	99.9159
S618	UMIseq	cfdna	23762480	3313452	307987984	234	9080	12990	NA	100	99.7931
S619	UMIseq	cfdna	36242316	7832104	807044681	823	27245	34691	NA	100	99.9224
S620	UMIseq	cfdna	45263023	4444052	453649012	684	16019	23762	NA	100	99.9741
S621	UMIseq	cfdna	42654223	4759474	452539188	846	15146	21118	NA	100	99.9935
S624	UMIseq	cfdna	88501858	11699741	1032974055	361	33502	50116	NA	100	99.9547
S626	UMIseq	cfdna	103215649	11452502	1092971112	1072	32150	46707	NA	100	100
S627	UMIseq	cfdna	14258091	1209515	113752128	87	3306	4598	NA	99.9871	98.5645
S629	UMIseq	cfdna	12555624	899426	86756149	100	2652	4753	NA	99.9935	98.1959
S630	UMIseq	cfdna	131564991	5313714	521474399	453	15701	24277	NA	100	99.9612
S631	UMIseq	cfdna	23267342	1893936	184133684	392	5910	9841	NA	100	99.8125
S635	UMIseq	cfdna	38777257	4730854	436567438	156	12600	19313	NA	100	99.8254
S636	UMIseq	cfdna	39892749	6328463	593492979	582	17933	25910	NA	100	99.9677
S637	UMIseq	cfdna	33441098	4776755	446850007	179	12283	23157	NA	100	99.7995
S638	UMIseq	cfdna	55735524	5949326	604023593	1003	19761	33535	NA	100	100
S640	UMIseq	cfdna	57458219	6448688	647177541	1187	22756	30209	NA	100	100
S645	UMIseq	cfdna	8826354	847489	78698680	39	2371	3845	NA	99.9289	94.2257
S646	UMIseq	cfdna	48270332	4568409	464110805	978	15676	21079	NA	100	99.9935
S648	UMIseq	cfdna	72024487	8311498	775599891	430	22154	33955	NA	100	99.9289
S649	UMIseq	cfdna	15120405	1260546	116322413	45	3246	5426	NA	99.9418	98.3317
S650	UMIseq	cfdna	34776404	2907913	281858631	455	8911	10926	NA	100	99.8965
S658	UMIseq	cfdna	43150244	4680711	444718255	326	12243	20756	NA	100	99.8642
S659	UMIseq	cfdna	92444059	9596968	889130282	576	26502	41562	NA	100	99.8901
S665	UMIseq	cfdna	23063018	1261135	114206100	71	3321	5515	NA	99.9806	98.0084
S667	UMIseq	cfdna	44340436	4806537	445359926	204	12515	20412	NA	100	99.8254
S668	UMIseq	cfdna	24668778	2460362	250603840	605	7959	14046	NA	100	99.9612
S669	UMIseq	cfdna	53368318	8228760	794224795	673	24667	35083	NA	100	99.9871
S672	UMIseq	cfdna	117668171	13403188	1183383979	403	33829	65625	NA	100	99.9483
S674	UMIseq	cfdna	78004013	8364067	724871257	225	22784	38096	NA	100	99.9224
S681	UMIseq	cfdna	42473897	1455238	152974485	198	4615	7020	NA	100	99.6444
S682	UMIseq	cfdna	29154575	5478562	496659685	560	15749	24982	NA	100	99.9483
S683	UMIseq	cfdna	59694886	8192970	831916842	1482	27567	41278	NA	100	100
S686	UMIseq	cfdna	21040490	1402562	131983134	134	3835	5377	NA	100	97.892
S691	UMIseq	cfdna	36300977	3540025	311746744	108	9776	15731	NA	100	99.7672
S692	UMIseq	cfdna	82179962	6345730	620491009	649	19663	30140	NA	100	99.9741
S693	UMIseq	cfdna	48957128	6441278	613267010	951	19665	27668	NA	100	99.9935
S694	UMIseq	cfdna	42941248	7158342	688478068	650	21351	31722	NA	100	99.9741
S695	UMIseq	cfdna	52695677	6172924	593536012	820	18831	25958	NA	100	99.9935
S696	UMIseq	cfdna	118706473	4896596	446480893	208	12571	21481	NA	100	99.8513
S698	UMIseq	cfdna	31645691	1838272	178793889	364	5736	11023	NA	100	99.806
S700	UMIseq	cfdna	80789958	8401206	854561324	1209	29331	35379	NA	100	100
S701	UMIseq	cfdna	121768565	11020814	1135739411	1592	39854	62111	NA	100	100
S709	UMIseq	cfdna	60517708	5837133	564459209	557	16589	23887	NA	100	99.9547
S710	UMIseq	cfdna	70864907	3607192	325875560	159	9574	14817	NA	100	99.6896
S711	UMIseq	cfdna	56318668	6357668	607757044	837	18768	27038	NA	100	99.9806
S712	UMIseq	cfdna	323216009	22286911	1887270268	200	65924	85838	NA	100	99.9677
S714	UMIseq	cfdna	26311619	1580428	150435750	124	3865	7721	NA	100	99.334
S716	UMIseq	cfdna	13292089	852300	83629473	105	2760	4107	NA	100	98.3834
S717	UMIseq	cfdna	43849202	7227337	627517632	191	18576	46228	NA	100	99.8965
S719	UMIseq	cfdna	34007183	4250828	404924667	289	11425	20946	NA	100	99.8707
S724	UMIseq	cfdna	31346869	2924630	284079666	325	9008	14332	NA	100	99.8577
S725	UMIseq	cfdna	63434927	7001654	680497414	806	21406	30734	NA	100	99.9871
S726	UMIseq	cfdna	46215644	3971500	393016528	406	12856	19429	NA	100	99.9289
S727	UMIseq	cfdna	89029496	10445277	935487479	366	27241	49514	NA	100	99.9289
S728	UMIseq	cfdna	38267742	3302865	329454229	645	11402	14941	NA	100	99.9741
S732	UMIseq	cfdna	69337596	7724142	724893778	439	20050	33110	NA	100	99.9289
S735	UMIseq	cfdna	32071956	4487778	426450081	293	13501	18958	NA	100	99.8771
S738	UMIseq	cfdna	62113772	7385414	735315874	1135	24124	36748	NA	100	100
S739	UMIseq	cfdna	25279447	2986059	273428331	122	7703	13808	NA	100	99.709
S740	UMIseq	cfdna	52889693	7847339	756854206	760	22243	34208	NA	100	99.9871
S742	UMIseq	cfdna	58065507	7024692	634151784	151	19172	24095	NA	100	99.9159
S748	UMIseq	cfdna	25766159	2838760	266658254	234	8179	11184	NA	100	99.7414
S749	UMIseq	cfdna	24849889	4924415	457581838	307	12960	20434	NA	100	99.8836
S751	UMIseq	cfdna	21039072	1199534	110733028	78	3019	5360	NA	99.9806	97.9825
S752	UMIseq	cfdna	70359239	8166556	677935757	188	23347	44868	NA	100	99.9159
S758	UMIseq	cfdna	17980224	910113	84757694	72	2357	3577	NA	99.9612	97.0061
S763	UMIseq	cfdna	303602	48318	3106127	3	111	351	NA	56.7281	0
S765	UMIseq	cfdna	115640065	9942888	986277935	1229	32063	52206	NA	100	100
S766	UMIseq	cfdna	63446759	6350356	620277781	856	19195	29153	NA	100	99.9935
S767	UMIseq	cfdna	40506136	6153304	595222092	896	19743	28405	NA	100	99.9935
S770	UMIseq	cfdna	39477689	4225266	408019998	584	12638	18932	NA	100	99.9418
S771	UMIseq	cfdna	78317637	3527984	328923398	140	9220	13645	NA	100	99.7414
S772	UMIseq	cfdna	21588251	2195163	209483819	230	5538	15521	NA	100	99.6896
S773	UMIseq	cfdna	26529248	3786209	364318290	502	12052	16130	NA	100	99.9159
S774	UMIseq	cfdna	45279770	6804216	660585181	874	21985	30015	NA	100	99.9935
S775	UMIseq	cfdna	32698539	5381194	540898673	643	17729	32701	NA	100	99.9741
S777	UMIseq	cfdna	26387401	1532753	146289970	246	4425	6514	NA	100	99.4504
S784	UMIseq	cfdna	24580391	2066283	205025981	225	6726	9125	NA	100	99.7478
S786	UMIseq	cfdna	42989724	5906232	573824727	790	18621	25971	NA	100	99.9871
S788	UMIseq	cfdna	48783370	4714826	473643908	669	15305	25054	NA	100	99.9806
S790	UMIseq	cfdna	25474454	2226022	211143861	85	6028	8983	NA	99.9871	99.4892
S792	UMIseq	cfdna	100985343	10783325	964548108	382	26649	59107	NA	100	99.9418
S793	UMIseq	cfdna	12813747	2109801	191591162	107	5174	13616	NA	100	99.431
S794	UMIseq	cfdna	89326417	10484859	922583679	254	30672	44069	NA	100	99.9289
S795	UMIseq	cfdna	23715138	4627577	444085630	541	13871	20716	NA	100	99.9095
S796	UMIseq	cfdna	37507129	2642108	253717933	187	7307	10975	NA	100	99.6638
S798	UMIseq	cfdna	129177329	17958826	1565410230	428	49496	69521	NA	100	99.9612
S799	UMIseq	cfdna	160435711	15630140	1371865410	730	43724	60214	NA	100	99.9741
S801	UMIseq	cfdna	69886611	8840944	846499107	1017	25203	41249	NA	100	100
S804	UMIseq	cfdna	56758224	4883632	460088273	361	13523	19834	NA	100	99.903
S805	UMIseq	cfdna	24182539	2331026	225903487	181	6285	9983	NA	100	99.6444
S808	UMIseq	cfdna	27645962	3756857	344144547	286	10436	15434	NA	100	99.8577
S810	UMIseq	cfdna	20671996	1891418	170008205	74	5123	7649	NA	99.9806	99.0042
S811	UMIseq	cfdna	94130856	11795623	1164356296	1657	36355	55396	NA	100	100
S813	UMIseq	cfdna	74247052	8136844	803717408	1113	25076	38334	NA	100	100
S814	UMIseq	cfdna	26336812	3038028	281905746	285	8282	10672	NA	100	99.8254
S815	UMIseq	cfdna	19436976	1548204	153502051	177	5094	6802	NA	100	99.3857
S816	UMIseq	cfdna	75967583	3822640	337188034	102	9002	15579	NA	100	99.722
S817	UMIseq	cfdna	139366167	19023412	1614456348	366	52091	89442	NA	100	99.9741
S818	UMIseq	cfdna	22251175	3761394	361159390	372	11047	18231	NA	100	99.903
S820	UMIseq	cfdna	22021482	3334789	348407183	568	11569	20559	NA	100	99.9741
S822	UMIseq	cfdna	27241714	3655993	315655834	86	9291	18716	NA	99.9871	99.7543
S824	UMIseq	cfdna	73076417	9990658	931942701	656	28516	45545	NA	100	99.9547
S825	UMIseq	cfdna	28487592	4839346	417863299	133	14253	21861	NA	100	99.8254
S828	UMIseq	cfdna	20014612	790590	74755454	96	2163	3655	NA	99.9935	96.1526
S829	UMIseq	cfdna	53575946	5833895	524454682	312	15696	22830	NA	100	99.9095
S830	UMIseq	cfdna	21933800	2939655	277834225	204	8124	11797	NA	100	99.709
S835	UMIseq	cfdna	33334545	3457394	315034836	213	9350	12695	NA	100	99.8448
S839	UMIseq	cfdna	17478432	2883739	276444664	236	8740	12108	NA	100	99.515
S841	UMIseq	cfdna	51248147	5137678	532182655	954	18250	29947	NA	100	99.9935
S845	UMIseq	cfdna	24028831	2196612	224482596	414	7269	11914	NA	100	99.8771
S856	UMIseq	cfdna	66691612	4849860	481940293	584	16517	22919	NA	100	99.9741
S857	UMIseq	cfdna	28167926	3983829	376861836	440	12068	17460	NA	100	99.9095
S860	UMIseq	cfdna	28197459	2248506	232492094	297	7481	11963	NA	100	99.8513
S861	UMIseq	cfdna	260279372	7462703	667468774	272	19016	31378	NA	100	99.9224
S862	UMIseq	cfdna	82922841	10620421	1005511185	665	31751	52203	NA	100	99.7866
S863	UMIseq	cfdna	80324252	6832876	625128641	243	18133	41761	NA	100	99.9289
S864	UMIseq	cfdna	17607042	1730408	176361804	394	5992	7580	NA	100	99.8125
S865	UMIseq	cfdna	144489994	7354434	751047052	1129	25708	41484	NA	100	100
S871	UMIseq	cfdna	93525295	9348026	921639296	1024	28055	38332	NA	100	100
S872	UMIseq	cfdna	18493161	1884289	178041432	151	5254	7699	NA	100	99.6573
S874	UMIseq	cfdna	23587879	2019834	199072106	534	6265	11033	NA	100	99.8901
S875	UMIseq	cfdna	87715511	7517500	766051918	1068	26353	45806	NA	100	100
S876	UMIseq	cfdna	159781077	26668757	2590414818	1191	83524	132746	NA	100	100
S877	UMIseq	cfdna	25883388	2905366	278743482	234	8210	11667	NA	100	99.7866
S878	UMIseq	cfdna	149445754	8497573	825256581	1233	27131	52412	NA	100	100
S879	UMIseq	cfdna	144973926	28935426	2915883049	3781	101744	141188	NA	100	100
S882	UMIseq	cfdna	44542419	3025244	283428629	388	8591	12970	NA	100	99.8836
S883	UMIseq	cfdna	8140355	983762	90537167	72	2704	4351	NA	99.9806	97.4846
S886	UMIseq	cfdna	98202246	5642979	546691232	610	16073	25259	NA	100	99.9289
S887	UMIseq	cfdna	46453618	NA	NA	409	13357	29165	NA	100	99.903
S888	UMIseq	cfdna	46339450	4140984	383218703	183	10957	17201	NA	100	99.8189
S892	UMIseq	cfdna	35781618	3699672	356395083	358	11044	18771	NA	100	99.8577
S893	UMIseq	cfdna	98207648	9508118	961453851	1508	31006	41898	NA	100	100
S894	UMIseq	cfdna	59701846	5493066	519578822	413	14342	24989	NA	100	99.9095
S896	UMIseq	cfdna	48052522	7521138	715507415	1140	21709	31430	NA	100	100
S898	UMIseq	cfdna	27065008	3154316	323037924	583	10639	16293	NA	100	99.9547
S899	UMIseq	cfdna	23174342	1670484	155904431	193	4405	7560	NA	100	99.4698
S900	UMIseq	cfdna	37461627	5332260	493988325	214	14195	19278	NA	100	99.8901
S901	UMIseq	cfdna	41301046	3285093	294990068	270	8836	13068	NA	100	99.8771
S903	UMIseq	cfdna	13995149	1100920	109286124	211	3657	4959	NA	100	97.9049
S905	UMIseq	cfdna	7806362	1132394	109548578	164	3417	5134	NA	100	99.3792
S907	UMIseq	cfdna	129860195	8439829	817277657	1315	23837	43084	NA	100	100
S913	UMIseq	cfdna	73405034	7087950	665994110	571	18953	28307	NA	100	99.9353
S914	UMIseq	cfdna	47617953	3524417	312295965	87	9245	16240	NA	99.9935	99.7414
S915	UMIseq	cfdna	16772044	1647642	162724053	185	5247	8312	NA	100	99.5732
S917	UMIseq	cfdna	80402919	9206224	863991552	471	24542	35954	NA	100	99.9353
S918	UMIseq	cfdna	26515801	3183990	320619368	570	10828	14179	NA	100	99.9741
S919	UMIseq	cfdna	30580186	4552550	442105617	15	12639	35629	NA	96.6828	91.7168
S920	UMIseq	cfdna	19274248	2438986	236357593	131	7305	11362	NA	100	99.5538
S922	UMIseq	cfdna	58292247	3888180	380222489	651	11856	16199	NA	100	99.9806
S925	UMIseq	cfdna	26836350	4043030	401381276	829	14280	20683	NA	100	99.9935
S926	UMIseq	cfdna	10792437	1759642	165922871	208	5241	7296	NA	100	99.6444
S927	UMIseq	cfdna	16155796	645384	61357008	127	1938	2743	NA	100	97.0837
S932	UMIseq	cfdna	2103829	426714	40993264	43	1176	2328	NA	99.9095	74.0123
S934	UMIseq	cfdna	19545764	694876	62771618	1	1708	4465	NA	99.7155	75.7129
S935	UMIseq	cfdna	182050957	21266910	1949960932	929	57160	86238	NA	100	99.9935
S936	UMIseq	cfdna	15134118	1324442	127224518	129	3874	5705	NA	100	99.4051
S940	UMIseq	cfdna	38468413	2977726	289695219	273	8209	11597	NA	100	99.722
S943	UMIseq	cfdna	16094091	1835424	167508940	156	5123	7569	NA	100	99.5862
S945	UMIseq	cfdna	49623163	5024956	478918876	68	14523	29467	NA	99.4956	93.3463
S946	UMIseq	cfdna	57091728	11661691	1072406513	478	31837	43979	NA	100	99.9483
S948	UMIseq	cfdna	27976744	5230612	500247273	531	16112	28216	NA	100	99.9353
S951	UMIseq	cfdna	50991101	4856126	475483338	574	15764	23152	NA	100	99.9677
S952	UMIseq	cfdna	105528610	8419764	776756266	348	21413	36468	NA	100	99.9289
S954	UMIseq	cfdna	25007355	3679786	344643707	251	8428	21402	NA	100	99.7543
S955	UMIseq	cfdna	25864301	2035402	195257381	266	5790	9488	NA	100	99.7543
S956	UMIseq	cfdna	8172059	670818	69029234	103	2287	3654	NA	100	97.7692
S957	UMIseq	cfdna	29123783	5248448	499660543	358	15333	19849	NA	100	99.9095
S963	UMIseq	cfdna	23925121	3622816	353884066	875	11517	18161	NA	100	99.9935
S966	UMIseq	cfdna	31747483	3738552	369073486	430	11858	16475	NA	100	99.9289
S968	UMIseq	cfdna	28158673	2423728	234161776	288	7587	10420	NA	100	99.722
S970	UMIseq	cfdna	39505494	2546622	252472729	403	8107	12051	NA	100	99.8448
S972	UMIseq	cfdna	34362150	3930786	397427735	785	12814	23401	NA	100	99.9871
S973	UMIseq	cfdna	11367569	926264	89802622	187	2897	4781	NA	100	99.1853
S978	UMIseq	cfdna	9524753	1297949	122972631	90	3709	5445	NA	99.9871	98.2865
S979	UMIseq	cfdna	60673554	3177978	283693925	59	8527	14492	NA	99.9806	99.6702
S984	UMIseq	cfdna	20402253	2270426	216120848	452	7152	9186	NA	100	99.9095
S985	UMIseq	cfdna	48848420	6456198	599573953	458	18050	22851	NA	100	99.9418
S986	UMIseq	cfdna	174168099	20351270	1857345807	693	54866	78048	NA	100	99.9806
S987	UMIseq	cfdna	159763952	7911566	664763174	160	21173	41224	NA	100	99.9224
S988	UMIseq	cfdna	18739021	2529075	248531910	451	8289	10486	NA	100	99.9095
S989	UMIseq	cfdna	21584961	2937266	276678849	311	9066	12963	NA	100	99.8254
S990	UMIseq	cfdna	114146881	7640920	740385941	631	22161	37480	NA	100	99.9741
S991	UMIseq	cfdna	83384261	14147014	1317845323	1308	40813	75433	NA	100	100
S992	UMIseq	cfdna	91124117	15332900	1407129510	930	45406	65684	NA	100	99.9935
S994	UMIseq	cfdna	39408478	4572835	440079073	305	12888	16735	NA	100	99.8383
S996	UMIseq	cfdna	24309120	3453220	315782404	145	9967	14097	NA	100	99.7608
S998	UMIseq	cfdna	164322172	9339982	760856766	56	25645	46808	NA	99.9806	99.9095
S1000	UMIseq	cfdna	26430313	3557532	346735191	381	11012	18577	NA	100	99.8319
S1003	UMIseq	cfdna	53149826	5984675	571176079	349	17317	24333	NA	100	99.7478
S1006	UMIseq	cfdna	81152639	9178076	778479895	187	27136	40245	NA	100	99.9289
S1008	UMIseq	cfdna	67731083	4429038	446721070	688	13747	27825	NA	100	99.9741
S1010	UMIseq	cfdna	123460674	4448376	466137175	690	14477	24859	NA	100	99.9741
S1011	UMIseq	cfdna	145219841	12871153	1217087357	1333	35207	60576	NA	100	100
S1012	UMIseq	cfdna	28785776	3147676	318070188	586	10864	14570	NA	100	99.9741
S1014	UMIseq	cfdna	12476451	680892	65174127	49	1951	3061	NA	99.9418	96.7346
S1016	UMIseq	cfdna	21694364	3084560	299160905	426	8720	19904	NA	100	99.8965
S1017	UMIseq	cfdna	31169917	2767078	273595856	12	8594	22424	NA	95.9586	90.2554
S1019	UMIseq	cfdna	51468977	6801500	612483893	489	18324	27683	NA	100	99.9483
S1020	UMIseq	cfdna	31219569	2078724	209855414	45	7068	16214	NA	99.5538	92.2211
S1021	UMIseq	cfdna	28702491	1538322	151732536	363	4891	8684	NA	100	99.7349
S1024	UMIseq	cfdna	71811927	9256965	847998178	317	24822	39161	NA	100	99.9289
S1027	UMIseq	cfdna	54500443	2353670	232496324	275	6920	10648	NA	100	99.7995
S1028	UMIseq	cfdna	130235498	20077960	1867827788	809	55351	74963	NA	100	99.9806
S1029	UMIseq	cfdna	29158927	2528336	227986978	34	7426	11135	NA	99.9741	99.4245
S1032	UMIseq	cfdna	16499040	2603686	270149751	602	9590	12575	NA	100	99.9483
S1034	UMIseq	cfdna	50380466	5416532	558447891	919	19181	28353	NA	100	99.9935
S1035	UMIseq	cfdna	133739125	7463150	719923367	907	23817	40967	NA	100	99.9935
S1036	UMIseq	cfdna	82483910	6358240	656277376	1111	20126	35433	NA	100	100
S1037	UMIseq	cfdna	92446896	6139312	614600892	1006	18703	34806	NA	100	100
S1040	UMIseq	cfdna	135028312	10114658	1011756080	40	31837	74706	NA	98.9007	95.7194
S1041	UMIseq	cfdna	12874533	905016	85061525	103	2354	3832	NA	100	97.42
S1042	UMIseq	cfdna	46393449	2310127	222487223	478	7257	9151	NA	100	99.8448
S1043	UMIseq	cfdna	21448115	2003296	188364170	80	5257	7480	NA	99.9871	99.4245
S1044	UMIseq	cfdna	16518287	1753598	171472337	259	5905	8827	NA	100	99.6379
S1045	UMIseq	cfdna	96013492	12697492	1122295245	343	33259	56071	NA	100	99.9418
S1046	UMIseq	cfdna	101854455	20154027	1702517915	304	52237	150866	NA	100	99.9612
S1047	UMIseq	cfdna	15901810	792818	78822628	157	2606	3635	NA	100	95.6288
S1048	UMIseq	cfdna	30126136	2914422	278847803	331	8285	13170	NA	100	99.8513
S1049	UMIseq	cfdna	33910852	4634654	426953282	145	12004	21624	NA	100	99.8189
S1051	UMIseq	cfdna	66472310	6298756	609972128	729	18129	28780	NA	100	99.9547
S1052	UMIseq	cfdna	81644079	12310265	1161078335	834	36162	46406	NA	100	99.9677
S1054	UMIseq	cfdna	25643894	3897918	380421170	389	12268	15967	NA	100	99.903
S1056	UMIseq	cfdna	11538065	503263	46252348	47	1298	1996	NA	99.9159	86.02
S1057	UMIseq	cfdna	25797009	3854506	376798318	578	12600	18815	NA	100	99.9741
S1058	UMIseq	cfdna	42716973	3481035	325292905	237	9967	16566	NA	100	99.7995
S1059	UMIseq	cfdna	60153615	3034791	289065479	243	8770	11974	NA	100	99.806
S1060	UMIseq	cfdna	27978740	5696985	542148551	455	17096	32875	NA	100	99.9095
S1063	UMIseq	cfdna	18885022	667106	65454366	122	1976	2830	NA	100	97.0837
S1066	UMIseq	cfdna	25304917	3736540	377165161	531	12588	19658	NA	100	99.9612
S1067	UMIseq	cfdna	28230172	1243628	116867866	79	3394	5108	NA	99.9806	98.3511
S1070	UMIseq	cfdna	23494068	2724686	254598869	167	7900	12024	NA	100	99.7995
S1071	UMIseq	cfdna	72261957	6472056	666548194	1121	23006	41288	NA	100	100
S1072	UMIseq	cfdna	96466654	16186430	1518253602	720	48806	77651	NA	100	99.9547
S1073	UMIseq	cfdna	57349692	5769251	518798278	358	15781	22615	NA	100	99.9289
S1074	UMIseq	cfdna	54412768	5069440	494527130	670	15099	21471	NA	100	99.9418
S1081	UMIseq	cfdna	10720653	883284	87844067	141	2949	5075	NA	100	98.9201
S1084	UMIseq	cfdna	37835343	5255800	467998049	155	13180	26512	NA	100	99.8448
S1085	UMIseq	cfdna	154132878	15564277	1347402900	268	43749	66081	NA	100	99.9353
S1086	UMIseq	cfdna	26715954	2548089	243430767	356	7700	9677	NA	100	99.8254
S1088	UMIseq	cfdna	9678171	1166208	113473362	154	3433	7768	NA	100	97.8791
S1090	UMIseq	cfdna	40871758	5600031	533868346	569	17265	24647	NA	100	99.9741
S1091	UMIseq	cfdna	18336561	788326	75373674	87	2181	2999	NA	99.9806	97.3747
S1092	UMIseq	cfdna	17396571	2337127	228403078	355	7412	9507	NA	100	99.8254
S1093	UMIseq	cfdna	29868370	3022726	312267119	443	10277	13844	NA	100	99.9612
S1100	UMIseq	cfdna	15273359	1176492	123510081	133	4111	8975	NA	100	90.8374
S1103	UMIseq	cfdna	75316158	7678278	765746525	1188	26759	43083	NA	100	100
S1105	UMIseq	cfdna	63313108	9430199	817126913	143	23257	58496	NA	100	99.9224
S1106	UMIseq	cfdna	93138091	6105652	608114826	901	21334	33247	NA	100	99.9935
S1107	UMIseq	cfdna	15654048	1296512	124235119	203	3517	5147	NA	100	99.1271
S1109	UMIseq	cfdna	133442981	13541578	1260454974	549	36835	50060	NA	100	99.9483
S1113	UMIseq	cfdna	69859369	4323576	417904315	425	11092	25207	NA	100	99.9224
S1114	UMIseq	cfdna	10026380	1347582	120370197	87	3717	5263	NA	99.9935	98.8878
S1115	UMIseq	cfdna	34344748	4369618	366585779	433	13184	24603	NA	100	99.903
S1117	UMIseq	cfdna	12164411	653351	60489524	47	1663	2717	NA	99.9095	91.4452
S1118	UMIseq	cfdna	26172957	3023002	298868748	404	9836	14617	NA	100	99.903
S1121	UMIseq	cfdna	23879958	1587394	152620222	189	4873	6352	NA	100	99.5732
S1123	UMIseq	cfdna	44111156	4204029	402044797	388	11983	15641	NA	100	99.9095
S1124	UMIseq	cfdna	92051815	18333876	1553976769	312	50060	92507	NA	100	99.9677
S1127	UMIseq	cfdna	108140991	7357888	736419294	847	24138	36840	NA	100	99.9935
S1128	UMIseq	cfdna	99804012	16815332	1547647697	2380	50571	81283	NA	100	100
S1130	UMIseq	cfdna	37368898	5070727	489089005	432	14946	23587	NA	100	99.9159
S1132	UMIseq	cfdna	54127830	6269895	597337248	459	18100	25408	NA	100	99.9095
S1133	UMIseq	cfdna	36415974	3967601	386844738	500	12878	19183	NA	100	99.9289
S1134	UMIseq	cfdna	16657889	1164006	124110184	224	4062	6653	NA	100	99.5021
S1135	UMIseq	cfdna	39890049	4327491	385524348	139	12196	19260	NA	100	99.8189
S1136	UMIseq	cfdna	9041400	1293296	125059180	207	4203	5980	NA	100	99.5538
S1137	UMIseq	cfdna	91136140	7291054	738413222	1094	23577	36941	NA	100	100
S1139	UMIseq	cfdna	141391562	9682334	920313088	591	28224	44204	NA	100	99.9483
S1141	UMIseq	cfdna	18373923	2428134	224704692	160	6644	9876	NA	100	99.7866
S1143	UMIseq	cfdna	53069574	9359599	868047921	286	25883	41802	NA	100	99.9353
S1145	UMIseq	cfdna	74285495	8587411	761178894	196	24178	39677	NA	100	99.9159
S1146	UMIseq	cfdna	24595313	3235288	324711040	599	11695	18949	NA	100	99.9547
S1147	UMIseq	cfdna	37552181	5019092	482024859	364	15556	21438	NA	100	99.9095
S1151	UMIseq	cfdna	47829985	3074596	300134737	359	9371	12321	NA	100	99.8836
S1152	UMIseq	cfdna	53059932	5141616	481122263	415	14794	21846	NA	100	99.9224
S1154	UMIseq	cfdna	29809274	2962526	288641026	671	9977	13142	NA	100	99.9871
S1155	UMIseq	cfdna	14341456	1707136	161677051	282	5466	7285	NA	100	99.6638
S1156	UMIseq	cfdna	98085923	10208410	965756749	890	28731	42682	NA	100	99.9935
S1157	UMIseq	cfdna	179118451	12499302	1274382791	2081	45186	63981	NA	100	100
S1158	UMIseq	cfdna	4986064	348126	37522326	87	1103	1735	NA	99.9935	74.1287
S1160	UMIseq	cfdna	82171462	16202588	1351395778	194	48762	82741	NA	100	99.9612
S1162	UMIseq	cfdna	27005161	2544066	256132950	381	9271	12490	NA	100	99.8707
S1163	UMIseq	cfdna	87760813	8096678	810653728	934	27058	43519	NA	100	99.9935
S1165	UMIseq	cfdna	128174051	16516118	1475087095	355	45288	64035	NA	100	99.9612
S1166	UMIseq	cfdna	19447830	2208170	217439818	351	7526	9176	NA	100	99.8383
S1167	UMIseq	cfdna	9131836	2336962	228372158	360	8000	11508	NA	100	99.8125
S1169	UMIseq	cfdna	13901502	1763715	164973836	91	4891	6861	NA	99.9871	99.4051
S1170	UMIseq	cfdna	28638360	2658706	255520456	147	7132	12493	NA	100	99.6508
S1171	UMIseq	cfdna	156558301	5900650	606964438	794	19345	30896	NA	100	99.9871
S1173	UMIseq	cfdna	82160077	9179545	846684380	267	26879	40608	NA	100	99.9289
S1175	UMIseq	cfdna	30085818	1932477	174083973	62	5262	7255	NA	99.9806	99.2693
S1176	UMIseq	cfdna	20396815	1376574	121225006	286	3387	6531	NA	100	99.6702
S1179	UMIseq	cfdna	91141489	7746626	764779723	179	24263	56459	NA	100	95.7258
S1180	UMIseq	cfdna	23604648	2412865	242751034	431	8032	13106	NA	100	99.8771
S1181	UMIseq	cfdna	49167420	3486868	331618092	199	9417	19962	NA	100	99.8254
S1184	UMIseq	cfdna	88850944	9461424	858465797	328	25118	38599	NA	100	99.9289
S1188	UMIseq	cfdna	33009539	4728484	435185508	174	13067	18652	NA	100	99.8577
S1189	UMIseq	cfdna	117375203	6336732	602887695	608	18827	30118	NA	100	99.9483
S1190	UMIseq	cfdna	31850487	2992264	284941552	208	8518	12742	NA	100	99.7478
S1192	UMIseq	cfdna	21765961	1184515	114678351	150	3515	5453	NA	100	99.2435
S1197	UMIseq	cfdna	94644137	7539062	712954812	606	21483	31263	NA	100	99.9483
S1199	UMIseq	cfdna	57695001	5449625	518168899	316	14677	21792	NA	100	99.9095
S1200	UMIseq	cfdna	10598398	907263	75990819	280	2383	5996	NA	100	96.6828
S1202	UMIseq	cfdna	11144530	701718	68369820	109	2186	3148	NA	100	97.7821
S1203	UMIseq	cfdna	73099154	6601822	681065944	1141	21953	31688	NA	100	100
S1204	UMIseq	cfdna	18130085	578846	57670546	105	1759	2576	NA	100	96.9415
S1209	UMIseq	cfdna	38569436	2246186	223098477	310	7567	9725	NA	100	99.8448
S1211	UMIseq	cfdna	70889404	7646899	661960812	225	22548	35243	NA	100	99.9224
S1212	UMIseq	cfdna	63671595	7715194	720783504	535	20993	29493	NA	100	99.9289
S1214	UMIseq	cfdna	22764683	2907860	281811302	339	9585	12763	NA	100	99.8513
S1215	UMIseq	cfdna	38231124	3926792	349446007	358	10889	16114	NA	100	99.9095
S1217	UMIseq	cfdna	147620069	15141410	1471712090	2038	43664	66670	NA	100	100
S1218	UMIseq	cfdna	29566191	3698360	365820294	801	12396	19427	NA	100	99.9935
S1219	UMIseq	cfdna	40978998	5101138	465939124	169	13885	18007	NA	100	99.8642
S1222	UMIseq	cfdna	71294827	7795142	775402711	1146	24401	34775	NA	100	100
S1223	UMIseq	cfdna	29805593	2580512	263962241	428	8798	13298	NA	100	99.9224
S1224	UMIseq	cfdna	29078026	7145969	614520614	248	21684	33153	NA	100	99.9289
S1227	UMIseq	cfdna	20483412	1662113	153072811	84	4256	6977	NA	99.9612	98.9007
S1228	UMIseq	cfdna	15448843	1456946	143539721	259	4693	8120	NA	100	99.515
S1229	UMIseq	cfdna	16089388	1678916	169504320	243	5451	11576	NA	100	99.7349
S1230	UMIseq	cfdna	218569184	23420088	1984865081	267	70567	103185	NA	100	99.9806
S1231	UMIseq	cfdna	42976023	4457021	389630592	305	11941	19283	NA	100	99.9095
S1232	UMIseq	cfdna	24183194	1772468	174132974	250	5643	10000	NA	100	99.7608
S1234	UMIseq	cfdna	40284519	2269422	214071589	99	6013	7833	NA	99.9935	99.3534
S1235	UMIseq	cfdna	75653916	7494638	671223614	184	19530	31952	NA	100	99.8836
S1236	UMIseq	cfdna	52896544	5512701	570745470	994	18325	23731	NA	100	99.9935
S1237	UMIseq	cfdna	39473115	4496490	438395839	513	13586	20286	NA	100	99.9289
S1238	UMIseq	cfdna	49000229	3587786	360751697	612	11110	22793	NA	100	99.9741
S1239	UMIseq	cfdna	89320687	7953450	743279372	534	20364	33890	NA	100	99.9289
S1240	UMIseq	cfdna	138524225	24297031	2217897879	753	67875	100935	NA	100	99.9871
S1241	UMIseq	cfdna	32764673	2706548	286432583	546	8796	14991	NA	100	99.9677
S1243	UMIseq	cfdna	73861189	9439934	935899986	1071	28476	52171	NA	100	100
S1244	UMIseq	cfdna	109804961	8034226	728568141	488	22191	30581	NA	100	99.9418
S1246	UMIseq	cfdna	16226584	1393981	123910490	311	3419	8088	NA	100	99.5344
S1248	UMIseq	cfdna	21062951	1601458	153095100	182	4752	6922	NA	100	99.418
S1250	UMIseq	cfdna	18872214	2236936	222426384	261	7674	10559	NA	100	99.8254
S1251	UMIseq	cfdna	92961403	9456363	910541541	994	28922	36916	NA	100	99.9935
S1256	UMIseq	cfdna	113619498	15208291	1415792449	554	40986	56092	NA	100	99.9677
S1257	UMIseq	cfdna	22518160	2144879	212546630	330	6736	11812	NA	100	99.8254
S1258	UMIseq	cfdna	142099719	12261699	1100511123	329	31593	55420	NA	100	99.9418
S1259	UMIseq	cfdna	12121070	1628066	149714596	82	4356	6154	NA	99.9806	98.1442
S1261	UMIseq	cfdna	52895387	5140422	537559260	732	17417	22525	NA	100	99.9871
S1262	UMIseq	cfdna	32399835	3464839	320397370	153	9283	13828	NA	100	99.7414
S1266	UMIseq	cfdna	43892722	1984694	188403033	149	5713	9853	NA	100	99.5603
S1268	UMIseq	cfdna	83508637	7239522	690976945	85	20824	53972	NA	99.9353	91.6004
S1269	UMIseq	cfdna	99385630	8313346	781196643	422	21194	34534	NA	100	99.9353
S1270	UMIseq	cfdna	21301472	2258359	216576420	223	6600	10331	NA	100	99.7349
S1272	UMIseq	cfdna	27945841	1390748	142991806	239	4819	6615	NA	100	99.5344
S1273	UMIseq	cfdna	224578874	15238476	1504362114	2019	51504	75199	NA	100	100
S1274	UMIseq	cfdna	58630334	6988552	731234418	1515	24467	30301	NA	100	100
S1277	UMIseq	cfdna	16442182	1769300	171337619	189	5199	7579	NA	100	99.5215
S1279	UMIseq	cfdna	55511466	3808824	369342738	597	11628	15076	NA	100	99.9418
S1280	UMIseq	cfdna	114978089	9797601	964042568	1212	27995	53137	NA	100	100
S1281	UMIseq	cfdna	48174078	4827991	462201729	336	13590	23480	NA	100	99.9224
S1284	UMIseq	cfdna	17161451	987472	94039126	69	2857	3959	NA	99.9871	98.4804
S1285	UMIseq	cfdna	24775138	1958158	192507183	298	6308	9527	NA	100	99.7349
S1287	UMIseq	cfdna	113805078	15767092	1547901938	2193	49782	76556	NA	100	100
S1288	UMIseq	cfdna	47006269	7893559	787346912	1233	24781	45943	NA	100	100
S1290	UMIseq	cfdna	31241365	1580528	155464380	205	4413	7029	NA	100	99.3857
S1291	UMIseq	cfdna	26397706	2557934	254896360	359	8520	12309	NA	100	99.8642
S1292	UMIseq	cfdna	37581644	5622111	535108800	581	15385	28503	NA	100	99.9289
S1297	UMIseq	cfdna	20301437	2008147	179989089	47	5176	8721	NA	99.9677	99.4504
S1298	UMIseq	cfdna	15676557	2187923	211011251	258	6526	9728	NA	100	99.7478
S1299	UMIseq	cfdna	86534404	8660921	747243513	314	24819	39425	NA	100	99.9483
S1302	UMIseq	cfdna	16877542	3168516	308243519	391	9818	13536	NA	100	99.8965
S1303	UMIseq	cfdna	26016979	1963916	194671746	224	6760	10921	NA	100	99.7672
S1307	UMIseq	cfdna	17473152	2177129	205790491	272	6851	9190	NA	100	99.6896
S1308	UMIseq	cfdna	50981878	2083730	199769420	364	6040	8692	NA	100	99.7995
S1309	UMIseq	cfdna	24984329	3558320	354623734	555	12727	17045	NA	100	99.9741
S1312	UMIseq	cfdna	27720299	4129945	384060393	159	10676	19405	NA	100	99.7543
S1316	UMIseq	cfdna	35008428	2075866	216399328	516	7110	9092	NA	100	99.9547
S1320	UMIseq	cfdna	147553741	8897814	757502220	141	22313	52888	NA	100	99.9224
S1321	UMIseq	cfdna	25321483	1870372	181275461	220	5694	10401	NA	100	99.7155
S1323	UMIseq	cfdna	32953444	3044444	297805334	412	9325	14013	NA	100	99.903
S1325	UMIseq	cfdna	58001993	6391790	564420783	242	17340	29769	NA	100	99.903
S1328	UMIseq	cfdna	38386103	3824382	374996806	577	12018	20173	NA	100	99.9741
S1331	UMIseq	cfdna	150591446	15515486	1463375888	1261	40814	68757	NA	100	100
S1332	UMIseq	cfdna	43600563	4187026	418814958	590	13898	20672	NA	100	99.9741
S1333	UMIseq	cfdna	94167683	7402240	728123208	1090	22345	28223	NA	100	100
S1335	UMIseq	cfdna	10531348	1773314	171272511	268	5758	9083	NA	100	99.6638
S1337	UMIseq	cfdna	81347196	14059488	1300132747	504	36964	62636	NA	100	99.9418
S1341	UMIseq	cfdna	42693992	3921429	370461049	389	11005	17670	NA	100	99.9095
S1343	UMIseq	cfdna	55450999	5288265	515419391	1084	17684	22572	NA	100	100
S1344	UMIseq	cfdna	69795734	11434802	1037674940	407	31132	48146	NA	100	99.9289
S1345	UMIseq	cfdna	119460375	8089262	766926170	397	20437	41219	NA	100	99.9289
S1346	UMIseq	cfdna	32688959	2811082	281353530	439	9278	14730	NA	100	99.8965
S1349	UMIseq	cfdna	92265795	11816241	1061858469	334	30845	49625	NA	100	99.9483
S1351	UMIseq	cfdna	47462837	3969106	394959237	715	13696	18420	NA	100	99.9612
S1352	UMIseq	cfdna	17277524	2341924	231323892	417	7961	11649	NA	100	99.8836
S1354	UMIseq	cfdna	15631945	1067061	100790364	37	2999	4394	NA	99.9289	97.7304
S1355	UMIseq	cfdna	38971087	2724752	280192970	391	9174	17107	NA	100	99.8965
S1357	UMIseq	cfdna	174872461	23520122	1983730222	365	66256	88589	NA	100	99.9806
S1358	UMIseq	cfdna	91918766	7135080	614302407	128	18993	32643	NA	100	99.903
S1359	UMIseq	cfdna	5612581	780630	75788236	160	2700	3864	NA	100	98.7068
S1361	UMIseq	cfdna	25059218	3171584	270865828	98	8535	15613	NA	99.9935	99.7349
S1363	UMIseq	cfdna	32953354	2651320	267984838	410	8994	12984	NA	100	99.903
S1364	UMIseq	cfdna	100800091	11644706	973539917	182	34021	47966	NA	100	99.9353
S1365	UMIseq	cfdna	30882737	4233852	402761305	385	11637	19947	NA	100	99.8771
S1366	UMIseq	cfdna	47687624	5056476	483164093	742	15890	20973	NA	100	99.9935
S1369	UMIseq	cfdna	53703882	3643650	371017629	652	13090	18109	NA	100	99.9741
S1370	UMIseq	cfdna	104155560	7888235	751018106	614	20367	31596	NA	100	99.9418
S1371	UMIseq	cfdna	43304472	4143266	390894675	366	11713	22692	NA	100	99.8771
S1372	UMIseq	cfdna	47537181	6603878	643058424	892	21690	34719	NA	100	99.9935
S1375	UMIseq	cfdna	52499619	6531320	635483064	751	19101	30498	NA	100	99.9871
S1376	UMIseq	cfdna	45127526	4277087	404489283	336	11281	17341	NA	100	99.8577
S1378	UMIseq	cfdna	23498914	2326512	232958554	579	7843	10312	NA	100	99.9289
S1379	UMIseq	cfdna	34502303	2817266	276364419	340	8747	11596	NA	100	99.8707
S1380	UMIseq	cfdna	22077991	2940939	292916724	456	10341	14052	NA	100	99.9547
S1381	UMIseq	cfdna	21646923	1748230	178068209	267	5713	9980	NA	100	99.7672
S1382	UMIseq	cfdna	109297072	14653476	1323063124	820	41534	58806	NA	100	99.9871
S1383	UMIseq	cfdna	116819097	8387502	780943068	333	21961	28742	NA	100	99.9289
S1384	UMIseq	cfdna	16440770	825832	81766034	94	2663	4062	NA	99.9935	97.9373
S1386	UMIseq	cfdna	74677305	6491126	620247139	458	19831	28298	NA	100	99.9289
S1387	UMIseq	cfdna	57824236	7038215	628988932	320	19349	28182	NA	100	99.9418
S1388	UMIseq	cfdna	5729644	264005	17114022	35	503	4421	NA	98.4804	14.1351
S1389	UMIseq	cfdna	49303804	7421409	691318363	410	19564	35713	NA	100	99.9159
S1390	UMIseq	cfdna	88933623	6544902	614008406	445	17185	28182	NA	100	99.9224
S1391	UMIseq	cfdna	43761900	3567671	335130669	221	10752	16574	NA	100	99.8836
S1392	UMIseq	cfdna	30514401	2961660	280503971	197	8459	13231	NA	100	99.7931
S1393	UMIseq	cfdna	25605861	3475852	327227937	301	10149	14881	NA	100	99.8319
S1394	UMIseq	cfdna	29773707	4939166	482049273	585	16461	21829	NA	100	99.9741
S1396	UMIseq	cfdna	9434643	810138	78911894	178	2341	4439	NA	100	98.7714
S1401	UMIseq	cfdna	33536580	2795422	273217858	393	8540	14517	NA	100	99.8707
S1402	UMIseq	cfdna	83555830	6950300	672878028	816	18099	44165	NA	100	99.9871
S1403	UMIseq	cfdna	107002061	14814112	1439847229	2098	43924	77098	NA	100	100
S1404	UMIseq	cfdna	55203124	3706886	350840403	168	11035	14803	NA	100	99.7866
S1405	UMIseq	cfdna	37999565	5514102	569974664	1120	20051	27532	NA	100	100
S1406	UMIseq	cfdna	15087478	3165148	295565337	265	8807	12089	NA	100	99.8319
S1407	UMIseq	cfdna	21397922	2862646	275153645	167	8903	12072	NA	100	99.7543
S1409	UMIseq	cfdna	19273814	2872916	261614690	91	7559	12406	NA	99.9935	99.6379
S1410	UMIseq	cfdna	23357476	1062940	107626985	90	3542	4657	NA	99.9935	98.6486
S1411	UMIseq	cfdna	57123123	6106270	607379912	956	20968	26272	NA	100	99.9935
S1412	UMIseq	cfdna	71593274	8882380	898585090	1292	29202	44243	NA	100	100
S1413	UMIseq	cfdna	19395589	1880916	182203573	295	6005	8815	NA	100	99.7349
S1415	UMIseq	cfdna	16621230	2037744	195408498	257	6161	7560	NA	100	99.6896
S1416	UMIseq	cfdna	21346951	1544313	153012794	244	4972	7782	NA	100	99.6832
S1417	UMIseq	cfdna	54215893	5950748	565296298	872	15875	32956	NA	100	99.9935
S1418	UMIseq	cfdna	77776059	4285226	445774118	794	14551	29777	NA	100	99.9871
S1421	UMIseq	cfdna	8105937	1339070	131454521	202	4399	6295	NA	100	99.5926
S1422	UMIseq	cfdna	12766535	1380137	129782868	84	3922	5903	NA	99.9677	98.9266
S1423	UMIseq	cfdna	27286940	3063630	294031979	160	8331	13575	NA	100	99.7478
S1424	UMIseq	cfdna	35331549	4831528	447345450	262	11644	23956	NA	100	99.8771
S1426	UMIseq	cfdna	44352983	3381940	337402930	957	10977	15295	NA	100	99.9935
S1429	UMIseq	cfdna	94164337	8142220	758885331	618	23007	29866	NA	100	99.9418
S1430	UMIseq	cfdna	33067014	1539968	143884752	71	4185	5797	NA	99.9806	98.7262
S1432	UMIseq	cfdna	12993339	1254521	117543897	112	3531	5070	NA	100	98.8231
S1437	UMIseq	cfdna	84908536	10002747	862400309	296	23899	62176	NA	100	99.9289
S1438	UMIseq	cfdna	24166142	1929644	186124347	184	5589	8087	NA	100	99.6767
S1439	UMIseq	cfdna	113859558	9630076	951692946	1597	28014	51919	NA	100	100
S1442	UMIseq	cfdna	26488292	2979123	274079415	170	8172	13090	NA	100	99.0753
S1443	UMIseq	cfdna	14939277	1349970	136674878	39	4630	10747	NA	98.8425	89.7834
S1444	UMIseq	cfdna	83620728	8802958	824582116	460	24543	40955	NA	100	99.9289
S1446	UMIseq	cfdna	25193761	1103514	105720253	71	3211	4445	NA	99.9871	98.0213
S1450	UMIseq	cfdna	55963452	5049456	463262161	425	12064	27185	NA	100	99.9095
S1451	UMIseq	cfdna	59053837	7388500	664360597	192	18788	35587	NA	100	99.9289
S1454	UMIseq	cfdna	11060190	594330	53210482	20	1608	2678	NA	99.8254	94.0575
S1455	UMIseq	cfdna	19319034	1841070	183802669	268	6282	8827	NA	100	99.7801
S1457	UMIseq	cfdna	23886267	1973788	191515429	218	6031	7613	NA	100	99.6056
S1459	UMIseq	cfdna	61133952	7179851	663519189	354	17296	34630	NA	100	99.9289
S1460	UMIseq	cfdna	57948217	5102648	486690157	447	13985	21412	NA	100	99.9095
S1462	UMIseq	cfdna	29904084	1844796	178132613	16	5278	12792	NA	97.1225	86.9512
S1464	UMIseq	cfdna	42339630	4371916	416795447	346	12078	17251	NA	100	99.8965
S1468	UMIseq	cfdna	25963721	3518302	351709837	606	11514	18208	NA	100	99.9741
S1472	UMIseq	cfdna	91938987	4272966	397147644	259	10463	18982	NA	100	99.7737
S1474	UMIseq	cfdna	22967144	976369	92824985	11	2561	6097	NA	99.8189	87.6043
S1475	UMIseq	cfdna	118153599	8668396	776666482	248	22171	46974	NA	100	99.9224
S1476	UMIseq	cfdna	24334720	2839688	271450894	424	8863	12864	NA	100	99.9095
S1480	UMIseq	cfdna	27759575	4120630	406650411	520	14367	19423	NA	100	99.9612
S1481	UMIseq	cfdna	46651959	4102310	366309870	197	10821	19811	NA	100	99.8319
S1482	UMIseq	cfdna	22579909	2074916	197810495	181	5230	12446	NA	100	99.5926
S1483	UMIseq	cfdna	52629077	6076078	568688777	539	15714	28412	NA	100	99.9353
S1485	UMIseq	cfdna	61169256	6062312	548529230	494	15476	24110	NA	100	99.9289
S1486	UMIseq	cfdna	47999643	4328056	412794211	347	12272	16288	NA	100	99.8901
S1488	UMIseq	cfdna	19187059	773778	80172803	188	2573	3619	NA	100	98.2089
S1489	UMIseq	cfdna	21628605	2642020	271152326	493	9277	14567	NA	100	99.9353
S1491	UMIseq	cfdna	17507892	2317352	228834822	395	7793	10400	NA	100	99.8513
S1493	UMIseq	cfdna	34227010	3628899	340794079	415	10130	14584	NA	100	99.8965
S1494	UMIseq	cfdna	9304864	760468	70555306	65	1997	2942	NA	99.9741	95.8875
S1495	UMIseq	cfdna	40663578	3668936	357453975	554	11841	16049	NA	100	99.9547
S1496	UMIseq	cfdna	38595854	6140036	600662503	521	20418	32202	NA	100	99.9741
S1497	UMIseq	cfdna	27736880	1224714	120547573	198	4025	5308	NA	100	99.4439
S1498	UMIseq	cfdna	93361678	16582665	1493374205	535	47555	82435	NA	100	99.9677
S1500	UMIseq	cfdna	38085301	3028452	312765493	473	9867	17733	NA	100	99.9547
S1502	UMIseq	cfdna	77711921	4438254	427529994	475	13314	16270	NA	100	99.9289
S1504	UMIseq	cfdna	22335713	3927654	396867816	661	14384	20888	NA	100	99.9806
S1509	UMIseq	cfdna	179469896	24641552	2075736486	573	69174	117170	NA	100	99.9806
S1510	UMIseq	cfdna	55393614	4392248	451526006	775	14533	25306	NA	100	99.9871
S1513	UMIseq	cfdna	16678378	573412	56371270	2	1690	3902	NA	99.8189	78.2347
S1514	UMIseq	cfdna	43577832	4155503	389143659	292	10896	16912	NA	100	99.8254
S1515	UMIseq	cfdna	16707102	2175912	206843590	211	6625	10819	NA	100	99.7284
S1517	UMIseq	cfdna	10517475	1540218	152559778	223	5203	6614	NA	100	99.612
S1518	UMIseq	cfdna	1275482	62850	5876299	5	183	584	NA	90.6499	0
S1520	UMIseq	cfdna	118258041	3865661	370786469	334	10516	17156	NA	100	99.8771
S1521	UMIseq	cfdna	91394515	3270764	329552320	437	10064	14916	NA	100	99.9418
S1522	UMIseq	cfdna	22025374	3194456	297516311	171	8809	12946	NA	100	99.7608
S1523	UMIseq	cfdna	52283888	4507562	443293120	413	14197	27173	NA	100	99.9547
S1524	UMIseq	cfdna	104747895	11517780	987898588	142	33388	52378	NA	100	99.9289
S1526	UMIseq	cfdna	30186004	2411292	225122285	156	5944	10329	NA	100	99.6444
S1528	UMIseq	cfdna	65786745	3635286	364488023	571	12078	15580	NA	100	99.9806
S1530	UMIseq	cfdna	33832166	6473322	599707775	564	18300	24745	NA	100	99.9353
S1535	UMIseq	cfdna	122732776	9779161	937271824	636	27483	43866	NA	100	99.9741
S1536	UMIseq	cfdna	49112852	2647514	246603601	224	6876	10288	NA	100	99.7414
S1537	UMIseq	cfdna	10821344	910028	88798834	204	2914	5133	NA	100	99.3922
S1539	UMIseq	cfdna	12953020	1750261	169955499	236	5362	9248	NA	100	99.6702
S1540	UMIseq	cfdna	31148844	2717664	269454134	432	8921	13665	NA	100	99.903
S1541	UMIseq	cfdna	47142447	9311888	896833431	579	26409	46015	NA	100	99.9741
S1542	UMIseq	cfdna	24744426	2469554	229794592	173	6625	10246	NA	100	99.7414
S1543	UMIseq	cfdna	23113571	2172016	212437641	250	6542	12270	NA	100	99.806
S1544	UMIseq	cfdna	20387895	2534185	235944644	166	6575	10328	NA	100	99.6573
S1546	UMIseq	cfdna	33513912	2974474	276267024	202	8193	11943	NA	100	99.7284
S1550	UMIseq	cfdna	27063366	2338740	228598689	308	6090	14218	NA	100	99.7349
S1551	UMIseq	cfdna	199593571	18518870	1642290790	1114	51040	75626	NA	100	100
S1552	UMIseq	cfdna	33891520	3599288	346819123	470	10853	14681	NA	100	99.9095
S1555	UMIseq	cfdna	11696668	947212	93604679	135	2996	4666	NA	100	99.1271
S1556	UMIseq	cfdna	34183480	5448831	513291790	488	15806	22471	NA	100	99.9353
S1559	UMIseq	cfdna	35664125	3087152	288949954	216	8471	11790	NA	100	99.7414
S1560	UMIseq	cfdna	19557136	2285942	213676383	137	5956	11281	NA	100	99.6379
S1561	UMIseq	cfdna	27588941	2887361	270422030	178	7895	10193	NA	100	99.709
S1562	UMIseq	cfdna	16385893	2080399	200992712	411	6886	8259	NA	100	99.8642
S1563	UMIseq	cfdna	26674358	2196357	206248377	165	5890	8804	NA	100	99.515
S1572	UMIseq	cfdna	15826453	1153434	117551100	226	3553	7409	NA	100	99.4827
S1573	UMIseq	cfdna	26568806	3496786	349700276	670	12118	16758	NA	100	99.9741
S1574	UMIseq	cfdna	25257245	2757575	250761712	75	7318	12241	NA	99.9871	99.6767
S1576	UMIseq	cfdna	114039535	13274249	1047859359	151	39420	54979	NA	100	99.9418
S1582	UMIseq	cfdna	45078990	6079582	573094866	274	16225	27666	NA	100	99.903
S1583	UMIseq	cfdna	52892197	5915396	573584276	773	17716	34654	NA	100	99.9871
S1586	UMIseq	cfdna	20624201	2631240	249439332	173	7597	10025	NA	100	99.7026
S1588	UMIseq	cfdna	21145332	2231694	214311496	232	6737	9823	NA	100	99.7155
S1591	UMIseq	cfdna	30650952	3747740	351673268	403	10365	14055	NA	100	99.8965
S1592	UMIseq	cfdna	68683016	8892783	864493995	1075	29642	41690	NA	100	100
S1593	UMIseq	cfdna	200538607	13067092	1262480617	1336	36488	70365	NA	100	100
S1594	UMIseq	cfdna	204856346	30341090	2786067318	1697	85663	135973	NA	100	100
S1595	UMIseq	cfdna	32778056	3154474	306263814	365	10162	15460	NA	100	99.8577
S1596	UMIseq	cfdna	24032579	2727098	263038823	317	8604	11659	NA	100	99.7737
S1597	UMIseq	cfdna	35774383	4439868	406501679	401	12198	16810	NA	100	99.9289
S1598	UMIseq	cfdna	44424410	2734078	273459238	382	8705	11202	NA	100	99.8836
S1599	UMIseq	cfdna	27501491	2887501	257865882	76	7898	10874	NA	99.9871	99.6379
S1600	UMIseq	cfdna	27760599	3281024	314232249	580	10681	16789	NA	100	99.9806
S1601	UMIseq	cfdna	189556132	10032025	866861040	293	27308	39550	NA	100	99.9353
S1602	UMIseq	cfdna	7644936	831098	79156547	84	2596	4017	NA	99.9935	97.4588
S1604	UMIseq	cfdna	148979752	9143390	936215489	1399	31470	46806	NA	100	100
S1605	UMIseq	cfdna	17964971	1403281	119533798	170	3534	5494	NA	100	99.2499
S1607	UMIseq	cfdna	19517622	1655469	161702398	230	4814	9376	NA	100	99.722
S1608	UMIseq	cfdna	28884412	2495810	222160740	80	6763	12258	NA	99.9871	99.625
S1613	UMIseq	cfdna	40090429	3561645	334295545	185	9398	13389	NA	100	99.7608
S1616	UMIseq	cfdna	26838078	2961644	291186880	499	9876	12991	NA	100	99.9353
S1618	UMIseq	cfdna	52978395	8256658	781697922	549	23358	35524	NA	100	99.9483
S1619	UMIseq	cfdna	91254881	6320106	643476979	145	22000	50590	NA	100	96.4694
S1621	UMIseq	cfdna	18390568	1996614	185586206	165	5361	7346	NA	100	99.5797
S1623	UMIseq	cfdna	29225643	948306	87921543	207	2360	5678	NA	100	98.9848
S1624	UMIseq	cfdna	22010974	1865940	175813476	159	5254	6874	NA	100	99.2047
S1626	UMIseq	cfdna	34055704	4064994	386227116	468	12123	16804	NA	100	99.9353
S1628	UMIseq	cfdna	31287236	3182470	332163019	473	10739	17584	NA	100	99.9547
S1630	UMIseq	cfdna	66363715	2978134	289730178	262	8435	13540	NA	100	99.7995
S1631	UMIseq	cfdna	14153870	1789822	163541356	194	5379	7068	NA	100	99.5991
S1632	UMIseq	cfdna	19232752	2125674	206508517	227	6652	8949	NA	100	99.6702
S1633	UMIseq	cfdna	80300052	10095531	903562757	393	28215	35978	NA	100	99.9418
S1634	UMIseq	cfdna	22739159	2703153	262571300	552	8620	11457	NA	100	99.9418
S1635	UMIseq	cfdna	27501299	1325648	125251016	80	3427	5724	NA	99.9806	98.558
S1637	UMIseq	cfdna	45911573	4107093	392129336	296	11394	14782	NA	100	99.8642
S1638	UMIseq	cfdna	46344374	6101802	555607693	780	18372	24717	NA	100	99.9871
S1639	UMIseq	cfdna	114670795	3616143	376790355	495	11490	16777	NA	100	99.9741
S1640	UMIseq	cfdna	148127514	4561150	435644428	375	11974	18208	NA	100	99.8836
S1643	UMIseq	cfdna	22755323	3106339	298425736	415	9512	15324	NA	100	99.8707
S1644	UMIseq	cfdna	89072447	8932038	826111992	496	24072	35156	NA	100	99.9289
S1646	UMIseq	cfdna	92307731	5639946	544488069	385	16019	24364	NA	100	99.9483
S1649	UMIseq	cfdna	100758242	4919208	451800713	221	12730	22659	NA	100	99.8254
S1651	UMIseq	cfdna	30089248	2764638	273210510	343	9079	12849	NA	100	99.8707
S1652	UMIseq	cfdna	64493030	6566060	641332018	1079	19003	37106	NA	100	100
S1653	UMIseq	cfdna	44113799	6582116	638141313	1038	22200	29017	NA	100	100
S1655	UMIseq	cfdna	66395528	10234651	1003034530	1442	30594	58836	NA	100	100
S1656	UMIseq	cfdna	30107899	1718776	151127158	30	4652	8815	NA	99.9353	98.7132
S1659	UMIseq	cfdna	5822008	1393162	127010449	167	3952	5569	NA	100	99.334
S1660	UMIseq	cfdna	31451245	3030375	303955249	431	10046	13211	NA	100	99.9224
S1661	UMIseq	cfdna	42332875	6343230	595166817	418	17388	23947	NA	100	99.9289
S1662	UMIseq	cfdna	63852615	4349254	440804765	653	14769	18147	NA	100	99.9806
S1663	UMIseq	cfdna	31180641	5068898	513806647	981	18543	24446	NA	100	99.9935
S1664	UMIseq	cfdna	76757204	4993164	474189656	168	15284	22435	NA	100	99.8771
S1666	UMIseq	cfdna	74983638	12950215	1137885742	386	34685	60353	NA	100	99.9483
S1667	UMIseq	cfdna	15148925	2090458	199274770	199	6089	8683	NA	100	99.6508
S1669	UMIseq	cfdna	6983832	724743	63079695	120	1711	4585	NA	100	92.6802
S1670	UMIseq	cfdna	37445530	3469802	342709349	548	11366	16467	NA	100	99.9547
S1672	UMIseq	cfdna	116996223	13743097	1234739591	621	36714	57852	NA	100	99.9612
S1673	UMIseq	cfdna	20968614	2953836	303648021	543	11111	15149	NA	100	99.9418
S1674	UMIseq	cfdna	58833055	3456486	331756354	312	10041	13679	NA	100	99.8707
S1676	UMIseq	cfdna	26335231	1649590	170281034	260	5259	8738	NA	100	99.7414
S1677	UMIseq	cfdna	24530494	5650549	539405291	604	17422	24518	NA	100	99.9289
S1680	UMIseq	cfdna	36035194	3150290	307442735	371	9184	15193	NA	100	99.8771
S1681	UMIseq	cfdna	43706589	4078592	396063697	504	11877	15906	NA	100	99.9159
S1683	UMIseq	cfdna	72680357	9197693	891779808	1130	26791	43412	NA	100	100
S1684	UMIseq	cfdna	17721851	2629234	244819721	180	7212	12426	NA	100	99.8383
S1685	UMIseq	cfdna	38586274	3918024	379415002	442	12755	17273	NA	100	99.9095
S1689	UMIseq	cfdna	80427668	14578133	1330277800	678	39098	58759	NA	100	99.9741
S1690	UMIseq	cfdna	64431443	5227479	478943852	325	14048	19536	NA	100	99.8901
S1693	UMIseq	cfdna	29594338	2510604	249390031	448	7746	13004	NA	100	99.9095
S1694	UMIseq	cfdna	41715198	1460758	145193072	172	4356	6433	NA	100	99.5021
S1695	UMIseq	cfdna	59096296	9435020	864936310	541	28271	40204	NA	100	99.9289
S1698	UMIseq	cfdna	154570524	16579713	1398822875	172	46615	69140	NA	100	99.9353
S1700	UMIseq	cfdna	69604993	4870874	437079335	162	12575	23053	NA	100	99.8577
S1701	UMIseq	cfdna	23297376	1391266	134968539	94	3782	5408	NA	99.9806	98.668
S1702	UMIseq	cfdna	35835570	5831405	547330630	398	15199	28343	NA	100	99.9289
S1703	UMIseq	cfdna	103764729	12337534	1104432771	345	33949	47478	NA	100	99.9483
S1704	UMIseq	cfdna	114507714	6223834	565534118	223	15430	32061	NA	100	99.8771
S1705	UMIseq	cfdna	52719767	4053934	374543990	77	11984	15876	NA	99.9871	99.7349
S1706	UMIseq	cfdna	22180117	3486848	341692844	479	11670	17509	NA	100	99.9547
S1707	UMIseq	cfdna	69842485	8268449	807005696	1305	27092	38411	NA	100	100
S1708	UMIseq	cfdna	11494768	1245926	121071580	142	4107	5849	NA	100	99.3146
S1709	UMIseq	cfdna	139550084	5579276	525368796	382	14746	23910	NA	100	99.9095
S1710	UMIseq	cfdna	53862709	3381312	324934134	382	10305	13921	NA	100	99.8965
S1711	UMIseq	cfdna	124590105	13834733	1290006390	609	38160	48838	NA	100	99.9741
S1712	UMIseq	cfdna	52488716	3464140	338326425	452	11236	15849	NA	100	99.9612
S1713	UMIseq	cfdna	79469078	7044258	730559418	1224	23643	35744	NA	100	100
S1714	UMIseq	cfdna	109990465	11491336	1063653140	409	31074	39543	NA	100	99.9353
S1716	UMIseq	cfdna	42734811	3423044	336585974	639	10556	15747	NA	100	99.9612
S1718	UMIseq	cfdna	44069654	5797336	530499796	237	15536	20931	NA	100	99.8771
S1719	UMIseq	cfdna	13296179	1420674	149730028	259	4541	6658	NA	100	99.6056
S1720	UMIseq	cfdna	84991339	4501293	445771954	679	14979	30066	NA	100	99.9741
S1721	UMIseq	cfdna	75440706	7007051	672043174	507	19635	27694	NA	100	99.9483
S1724	UMIseq	cfdna	16384424	1677197	144342825	56	4161	9494	NA	99.9806	99.1659
S1726	UMIseq	cfdna	84597160	6470483	596155998	178	17697	28229	NA	100	99.903
S1727	UMIseq	cfdna	38436612	2436294	257050046	441	7693	13730	NA	100	99.9095
S1729	UMIseq	cfdna	26174092	2565516	242112691	177	6655	11490	NA	100	99.6767
S1730	UMIseq	cfdna	35217005	1938648	187904094	201	5946	8066	NA	100	99.6444
S1731	UMIseq	cfdna	52278593	5107179	511660552	790	17908	25267	NA	100	99.9871
S1732	UMIseq	cfdna	15570344	1631838	160078546	183	5299	10025	NA	100	99.6444
S1733	UMIseq	cfdna	33217032	2851090	276147716	453	8396	13639	NA	100	99.9095
S1734	UMIseq	cfdna	45871309	7375064	666812349	547	20390	27765	NA	100	99.9289
S1736	UMIseq	cfdna	82854989	13943528	1158071929	439	36998	50886	NA	100	99.9353
S1737	UMIseq	cfdna	11246505	1506496	141736366	211	4721	6780	NA	100	99.5474
S1738	UMIseq	cfdna	41530937	3441192	350127088	592	12073	14706	NA	100	99.9741
S1739	UMIseq	cfdna	61298211	5275470	489079630	391	14240	25716	NA	100	99.9095
S1740	UMIseq	cfdna	33984217	2898824	297229017	44	9938	21348	NA	98.9977	93.6696
S1741	UMIseq	cfdna	38027645	1882098	182108292	162	4991	8720	NA	100	99.5926
S1742	UMIseq	cfdna	64591936	8753520	855457452	744	26534	42613	NA	100	99.9741
S1743	UMIseq	cfdna	43040706	4019102	379974211	274	10692	16576	NA	100	99.8577
S1744	UMIseq	cfdna	35422932	4521781	431952708	325	12878	19772	NA	100	99.8707
S1750	UMIseq	cfdna	56252439	3631098	345804433	332	9993	15063	NA	100	99.8254
S1751	UMIseq	cfdna	51900499	7852387	734731410	523	21648	31051	NA	100	99.9289
S1752	UMIseq	cfdna	19912664	2663040	256411252	354	7180	15210	NA	100	99.7543
S1755	UMIseq	cfdna	77116097	4330469	422562593	292	12034	29037	NA	100	99.8707
S1756	UMIseq	cfdna	95384359	13615387	1180473255	277	37877	71770	NA	100	99.9353
S1757	UMIseq	cfdna	82692034	11029423	1070485144	722	33345	58184	NA	100	99.9741
S1760	UMIseq	cfdna	22305160	2182619	202871762	159	5693	8580	NA	100	99.7737
S013	WGS	pbmc	1174545664	1174545664	174998208256	NA	51	NA	96.9339	0.259	NA
S127	WGS	pbmc	1188963124	1188963124	177045001600	NA	51	NA	96.3816	0.2519	NA
S135	WGS	pbmc	1257991370	1257991370	187245695074	NA	53	NA	96.3799	0.2786	NA
S137	WGS	pbmc	751446890	751446890	111831054315	NA	32	NA	96.3214	0.0993	NA
S208	WGS	pbmc	1524235844	1524235844	227037494184	NA	64	NA	96.5079	0.3987	NA
S244	WGS	pbmc	912169428	912169428	135717205032	NA	38	NA	96.1612	0.1332	NA
S352	WGS	pbmc	828792944	828792944	122937245263	NA	34	NA	96.0546	0.1201	NA
S684	WGS	pbmc	955475760	955475760	142328087288	NA	41	NA	96.747	0.1668	NA
S688	WGS	pbmc	932667054	932667054	138901715507	NA	40	NA	96.2317	0.1452	NA
S850	WGS	pbmc	771741816	771741816	114873807284	NA	33	NA	96.059	0.1036	NA
S298	WGS	pbmc	1049100944	1049100944	155206799417	NA	43	NA	96.7623	0.174	NA
S923	WGS	pbmc	983951084	983951084	146397064919	NA	42	NA	96.7627	0.1558	NA
S039	WGS	pbmc	861217550	861217550	128212904478	NA	37	NA	96.6392	0.1519	NA
S273	WGS	pbmc	876057898	876057898	130456015410	NA	38	NA	96.6757	0.1414	NA
S1116	WGS	pbmc	799520174	799520174	119022734277	NA	34	NA	96.4617	0.1106	NA
S950	WGS	pbmc	916886034	916886034	136455876047	NA	39	NA	96.2064	0.1635	NA
S928	WGS	pbmc	917288870	917288870	136527424061	NA	39	NA	96.7084	0.1546	NA
S033	WGS	pbmc	828103366	828103366	123292963547	NA	35	NA	96.123	0.1225	NA
S1253	WGS	pbmc	1576672886	1576672886	234869425687	NA	67	NA	97.0692	0.491	NA
S1004	WGS	pbmc	1002711256	1002711256	149248177914	NA	43	NA	96.7633	0.1839	NA
S003	WGS	pbmc	1184152488	1184152488	176096614670	NA	50	NA	96.9072	0.2603	NA
S1465	WGS	pbmc	885089040	885089040	131679870626	NA	37	NA	96.1642	0.1148	NA
S068	WGS	pbmc	971169438	971169438	144557881515	NA	41	NA	96.2205	0.1638	NA
S028	WES	pbmc	50908590	46841119	6336607805	0	55	1413	98.409	3.4537	NA
S047	WES	pbmc	45601688	42100328	5796788128	0	55	1362	98.5403	4.4016	NA
S031	WES	pbmc	44098152	40366861	5597344610	0	48	1216	98.4919	2.1196	NA
S058	WES	pbmc	75837012	69339373	9671889334	0	82	2057	98.6211	30.4602	NA
S070	WES	pbmc	24964034	21701824	2998942186	0	27	649	96.5357	0.044	NA
S071	WES	pbmc	45392864	41820607	5667047382	0	49	929	98.4283	1.585	NA
S076	WES	pbmc	60637528	53854154	7317037426	0	63	1426	98.4558	7.3258	NA
S080	WES	pbmc	30420372	27058584	3745520761	0	32	730	97.8728	0.0609	NA
S082	WES	pbmc	51676766	45056661	6340425208	0	55	1014	98.5038	4.7762	NA
S083	WES	pbmc	24092006	22377282	3075679127	0	30	663	96.414	0.0896	NA
S094	WES	pbmc	24261774	22543290	3089567294	0	29	701	97.6056	0.0531	NA
S098	WES	pbmc	64634134	56974986	7731783418	0	67	1386	98.3971	10.3794	NA
S104	WES	pbmc	30256968	26975319	3718798871	0	32	713	97.4766	0.0525	NA
S111	WES	pbmc	45093846	41413057	5585233957	0	48	1074	98.4239	1.4737	NA
S130	WES	pbmc	43073654	37592985	5438036708	0	49	984	98.1318	1.0735	NA
S051	WES	pbmc	43610362	37250696	5332872983	0	50	1004	98.1481	0.7232	NA
S155	WES	pbmc	63153078	55834655	7737363569	0	66	1567	98.5231	11.8742	NA
S157	WES	pbmc	47631014	43965510	6290707711	0	59	1213	98.4542	3.3091	NA
S162	WES	pbmc	54360094	46623290	6698424747	0	63	1408	98.3918	5.283	NA
S169	WES	pbmc	24145982	22340071	3086034451	0	30	592	97.5085	0.0878	NA
S175	WES	pbmc	108694292	95130028	13792904394	0	119	2707	98.7852	68.1827	NA
S179	WES	pbmc	45959780	42547929	5709224107	0	49	1283	98.3596	2.2929	NA
S185	WES	pbmc	82224942	74698529	10695334034	0	99	2134	98.5881	49.7897	NA
S187	WES	pbmc	31714508	29260799	4044176744	0	40	960	98.1551	0.1879	NA
S116	WES	pbmc	64221690	56995236	7964236396	0	73	1553	98.5457	20.47	NA
S201	WES	pbmc	37207256	34206445	4754216076	0	40	862	98.3221	0.2862	NA
S207	WES	pbmc	45332024	41724362	5712651660	0	52	1144	98.5392	2.918	NA
S216	WES	pbmc	26304658	23105431	3188506059	0	29	665	97.0127	0.0427	NA
S220	WES	pbmc	58627216	53695649	7624083984	0	71	1383	98.2316	15.1959	NA
S227	WES	pbmc	43782272	38131620	5434744611	0	45	1256	98.4178	1.0033	NA
S230	WES	pbmc	56558570	51621363	7132293610	0	69	1628	98.5134	13.4555	NA
S183	WES	pbmc	43518704	39429515	5483245270	0	46	1077	98.0806	1.6575	NA
S238	WES	pbmc	39468050	34885473	4964651416	0	41	971	98.1135	0.6297	NA
S243	WES	pbmc	22279838	20649619	2841910304	0	27	620	96.7926	0.0451	NA
S245	WES	pbmc	79368020	72846875	10278392260	0	96	1671	98.5481	45.8254	NA
S249	WES	pbmc	65640350	58679988	8452218324	0	80	1621	98.4749	25.4194	NA
S256	WES	pbmc	80554956	71379845	10140649714	0	85	2028	98.5544	34.3322	NA
S265	WES	pbmc	50548738	45456055	6443154930	0	55	1294	98.5011	3.5127	NA
S269	WES	pbmc	30973970	28583724	3939956958	0	39	704	97.9768	0.1893	NA
S280	WES	pbmc	46712592	42413621	5770939817	0	51	895	98.2941	1.8065	NA
S290	WES	pbmc	33577110	30912256	4275764852	0	42	730	98.16	0.3988	NA
S292	WES	pbmc	91089782	83536084	11192151746	0	104	2095	98.4549	54.6161	NA
S010	WES	pbmc	60808466	56052105	7923374779	0	70	1383	98.541	14.4504	NA
S297	WES	pbmc	68785270	62998768	8777840833	0	75	1902	98.5967	22.6466	NA
S299	WES	pbmc	81720778	73308697	10438880292	0	87	2095	98.5843	37.155	NA
S307	WES	pbmc	52924148	48732609	6536762583	0	56	1039	98.49	4.2378	NA
S308	WES	pbmc	68150092	59747058	8458207074	0	75	1470	98.5303	21.8135	NA
S319	WES	pbmc	20689660	18108236	2485443461	0	21	634	92.8705	0.0312	NA
S333	WES	pbmc	21037964	18623684	2567395944	0	23	556	94.3967	0.0207	NA
S335	WES	pbmc	23617942	21900430	3011482530	0	30	719	96.9136	0.0719	NA
S259	WES	pbmc	46459800	42359648	5863234218	0	51	845	98.3432	1.8398	NA
S105	WES	pbmc	45152702	41162302	5685568592	0	49	985	98.3692	2.3033	NA
S131	WES	pbmc	70478416	63710394	9149324385	0	83	1491	98.5346	31.7086	NA
S344	WES	pbmc	69378898	63936433	9008041235	0	80	1551	98.6303	28.4104	NA
S358	WES	pbmc	99093908	84460261	12173640665	0	104	2348	98.6302	54.9995	NA
S318	WES	pbmc	65717372	58079646	8365716252	0	76	1658	98.6104	17.8047	NA
S371	WES	pbmc	37298056	34064932	4777903250	0	41	1194	98.3574	0.4191	NA
S378	WES	pbmc	64286136	57677517	8075017170	0	70	1682	98.5723	18.0104	NA
S383	WES	pbmc	64961226	53158801	7673006997	0	67	1735	98.5974	12.4013	NA
S385	WES	pbmc	32743522	30034650	4143126879	0	41	958	98.2236	0.2476	NA
S363	WES	pbmc	52644824	46191348	6552663319	0	57	1200	98.1466	4.0804	NA
S113	WES	pbmc	38480122	35635682	4837078474	0	44	1079	98.3213	0.9837	NA
S396	WES	pbmc	18584192	17397446	2372138602	0	22	473	93.9	0.0292	NA
S399	WES	pbmc	43713450	39994200	5536952780	0	48	1185	98.5087	1.3934	NA
S360	WES	pbmc	57550066	53101342	7504540351	0	65	1541	97.924	12.6982	NA
S407	WES	pbmc	55246894	48685024	6877300504	0	59	1298	98.308	4.6568	NA
S296	WES	pbmc	102170738	93664606	12605272859	0	111	2196	98.5809	61.5552	NA
S200	WES	pbmc	31859642	29879438	4181960545	0	36	887	98.0484	0.2317	NA
S429	WES	pbmc	67955454	59579012	8519670245	0	76	2073	98.6178	22.921	NA
S433	WES	pbmc	27333156	25008326	3464325467	0	34	711	98.0063	0.0835	NA
S167	WES	pbmc	56614052	50088942	7108012672	0	66	1304	98.4132	7.7695	NA
S437	WES	pbmc	54876548	49873283	6927298726	0	60	1195	98.496	5.2854	NA
S440	WES	pbmc	92029220	79372918	11334630035	0	100	2213	98.6195	50.5916	NA
S231	WES	pbmc	63942904	58290457	8253515681	0	77	1309	98.1921	21.6469	NA
S456	WES	pbmc	90338620	83059918	11205363223	0	104	2236	98.3693	54.6302	NA
S459	WES	pbmc	22565496	19662026	2690042010	0	23	588	94.4954	0.0289	NA
S270	WES	pbmc	22569420	19829287	2731871795	0	25	521	94.9842	0.0336	NA
S468	WES	pbmc	61629052	56031062	7742514704	0	75	1861	98.6465	19.9271	NA
S359	WES	pbmc	50579452	46606745	6262106515	0	54	1327	98.3794	3.3658	NA
S478	WES	pbmc	79368020	72846875	10278392260	0	96	1671	98.5481	45.8254	NA
S480	WES	pbmc	52972416	48535340	6545128711	0	56	1435	98.4972	4.7759	NA
S491	WES	pbmc	45490106	41257052	5785486324	0	50	1108	98.404	1.4058	NA
S492	WES	pbmc	110345580	90870194	12926035018	0	119	2805	98.5639	71.3023	NA
S494	WES	pbmc	53801736	48514668	6911349849	0	62	1530	98.582	11.1319	NA
S502	WES	pbmc	44303328	39022711	5553342038	0	46	941	98.2385	1.278	NA
S511	WES	pbmc	59003056	53663622	7597347399	0	66	1575	98.4912	13.0926	NA
S513	WES	pbmc	44459426	40699388	5542498546	0	49	1238	98.366	1.0872	NA
S519	WES	pbmc	38536522	34911461	4917530212	0	42	974	98.0711	0.7344	NA
S027	WES	pbmc	77116440	67547335	9648586068	0	92	2122	98.5158	40.2429	NA
S435	WES	pbmc	68537428	62785716	8941471791	0	78	1527	98.4061	22.3154	NA
S085	WES	pbmc	32053198	29742995	4122324782	0	41	864	98.1898	0.2035	NA
S093	WES	pbmc	120019648	108508426	15569667424	0	146	2830	98.7317	83.8782	NA
S551	WES	pbmc	28049160	26108148	3561816674	0	34	643	98.0195	0.1081	NA
S556	WES	pbmc	50217980	46104243	6226025949	0	53	1268	98.5022	3.2046	NA
S320	WES	pbmc	49795018	45480568	6115660497	0	53	1212	98.4909	2.3222	NA
S561	WES	pbmc	46687490	42512647	5726746624	0	49	1074	98.4472	1.2347	NA
S568	WES	pbmc	49847824	45352386	6202217172	0	55	1051	98.3274	3.1527	NA
S574	WES	pbmc	21571408	19820555	2711518311	0	23	468	95.2413	0.0225	NA
S579	WES	pbmc	21255112	18725105	2570903261	0	22	518	93.7278	0.0276	NA
S581	WES	pbmc	26154288	23481397	3253069082	0	28	616	96.9685	0.0548	NA
S584	WES	pbmc	61153718	50510072	7300031647	0	64	1724	98.5925	9.6578	NA
S585	WES	pbmc	120059154	104448098	15139865053	0	132	3328	98.6876	78.0895	NA
S587	WES	pbmc	46652098	43688140	6145412907	0	53	1439	98.5004	3.249	NA
S591	WES	pbmc	50662706	44974991	6352986413	0	54	1294	98.4912	4.2496	NA
S091	WES	pbmc	70268990	57731486	8327794762	0	69	1745	98.5978	16.483	NA
S503	WES	pbmc	68439068	63530109	8968383132	0	80	1897	98.5467	28.8639	NA
S604	WES	pbmc	66911126	60324105	8529409247	0	72	1575	98.5999	20.1123	NA
S613	WES	pbmc	113024508	101923488	14618356745	0	136	2932	98.644	80.5084	NA
S521	WES	pbmc	50002732	45923272	6483698404	0	57	1219	97.8476	5.3022	NA
S639	WES	pbmc	93020222	80084360	11340602361	0	105	2038	98.5876	55.1649	NA
S460	WES	pbmc	52677920	47318473	6391850614	0	57	1182	98.4176	4.2922	NA
S641	WES	pbmc	53188238	43831717	6298374432	0	56	1376	98.4321	3.455	NA
S642	WES	pbmc	46342894	42295360	5865337239	0	51	1272	98.3428	1.7529	NA
S643	WES	pbmc	99217524	87408384	12263847924	0	109	2391	98.5803	59.2952	NA
S599	WES	pbmc	60808466	56052105	7923374779	0	70	1383	98.541	14.4504	NA
S436	WES	pbmc	56386682	51634978	7457794561	0	70	1285	98.1706	12.4556	NA
S240	WES	pbmc	42081366	36732861	5326744253	0	47	1101	98.2356	0.6879	NA
S652	WES	pbmc	30060910	27654190	3843083770	0	38	859	98.1234	0.1744	NA
S656	WES	pbmc	72864644	65413712	9321651294	0	83	1714	98.6446	32.0377	NA
S661	WES	pbmc	80738844	73201682	10568468234	0	100	1507	98.3823	50.2745	NA
S284	WES	pbmc	26537688	23829993	3298550169	0	28	736	96.6284	0.0518	NA
S670	WES	pbmc	61488098	55319079	7670231226	0	62	1393	98.6244	9.3313	NA
S677	WES	pbmc	98142156	83438441	12055867071	0	101	2226	98.6175	51.8792	NA
S215	WES	pbmc	51131534	45964067	6501880841	0	56	1435	98.4841	4.1146	NA
S610	WES	pbmc	21443616	19772333	2727896595	0	23	508	95.2914	0.023	NA
S343	WES	pbmc	76825406	70870666	9852904860	0	89	1493	98.4965	37.4424	NA
S703	WES	pbmc	37207256	34206445	4754216076	0	40	862	98.3221	0.2862	NA
S704	WES	pbmc	42197818	39553041	5562368851	0	48	1219	98.403	1.9613	NA
S707	WES	pbmc	64983422	59528038	8494753779	0	74	1304	98.4936	17.6263	NA
S718	WES	pbmc	24347244	22215631	3052585823	0	26	667	96.8634	0.0319	NA
S731	WES	pbmc	91001908	81910474	11590271093	0	105	1917	98.5569	56.1857	NA
S741	WES	pbmc	47279190	44317114	6207145117	0	54	1061	98.5142	3.2181	NA
S313	WES	pbmc	29503390	27257495	3763034983	0	37	711	98.0706	0.143	NA
S756	WES	pbmc	62670542	55634554	7555822100	0	65	1797	98.4615	10.8868	NA
S759	WES	pbmc	92007062	82235080	11560784517	0	103	2683	98.555	53.4486	NA
S403	WES	pbmc	57145104	52767225	7456711011	0	65	1566	97.8438	12.0508	NA
S769	WES	pbmc	67927264	60901697	8675711583	0	78	1693	98.5396	25.5936	NA
S214	WES	pbmc	47966406	43652766	6043408588	0	53	1195	98.4379	2.0658	NA
S702	WES	pbmc	23175134	20717416	2855873711	0	24	584	95.5455	0.0263	NA
S789	WES	pbmc	34257026	31552392	4374638910	0	43	1129	98.2577	0.404	NA
S803	WES	pbmc	60159974	49893289	7199601526	0	59	1671	98.4268	8.2319	NA
S746	WES	pbmc	30386482	28077722	3883816808	0	38	806	98.1011	0.133	NA
S680	WES	pbmc	48371778	44612171	5979472993	0	51	1032	98.4184	2.8071	NA
S315	WES	pbmc	68192198	59643514	8152376215	0	68	1505	98.6156	14.349	NA
S806	WES	pbmc	64442600	56243905	8089375965	0	76	1829	98.6107	21.8535	NA
S812	WES	pbmc	41888858	38548626	5314248175	0	53	1106	98.3331	2.4489	NA
S449	WES	pbmc	66830586	55539032	7984666053	0	69	1737	98.5748	10.6328	NA
S744	WES	pbmc	44575802	40953140	5674229412	0	50	1227	98.3171	1.323	NA
S736	WES	pbmc	71459424	58311240	8336759194	0	76	1556	98.6321	16.8137	NA
S827	WES	pbmc	55429640	50855725	6899480846	0	60	1339	98.5285	5.9283	NA
S834	WES	pbmc	47486214	41412834	5811000733	0	51	1321	98.2841	4.4321	NA
S842	WES	pbmc	136102980	122287174	17634744673	0	167	2634	98.5513	88.0403	NA
S846	WES	pbmc	68679676	61547113	8461121625	0	70	1653	98.5224	12.11	NA
S848	WES	pbmc	21470310	19348208	2678900620	0	22	506	93.9689	0.0222	NA
S833	WES	pbmc	65270432	58842420	8320627923	0	75	1511	98.445	17.3452	NA
S868	WES	pbmc	61036146	53936101	7458205649	0	64	1329	98.4793	10.0486	NA
S869	WES	pbmc	36207704	33060053	4619801162	0	40	894	98.29	0.2849	NA
S870	WES	pbmc	70457772	65016091	8740644031	0	82	1998	98.4154	29.0136	NA
S526	WES	pbmc	55901042	51073267	7257919953	0	68	1504	98.1058	10.5491	NA
S881	WES	pbmc	70609382	64445566	9106150115	0	79	1818	98.6273	27.013	NA
S897	WES	pbmc	21836910	19240071	2655467432	0	24	573	95.052	0.0345	NA
S908	WES	pbmc	96601530	87488245	12469099174	0	106	2593	98.7225	56.137	NA
S910	WES	pbmc	51068944	47066233	6378586298	0	55	1066	98.3784	3.5767	NA
S582	WES	pbmc	78156312	68417500	9798796892	0	92	1696	98.6182	40.0364	NA
S575	WES	pbmc	40706132	36415427	5111873185	0	43	991	98.2842	1.2211	NA
S733	WES	pbmc	68848594	63459049	8791060872	0	79	1556	98.4612	24.8736	NA
S930	WES	pbmc	64131834	57871785	8028319392	0	65	1872	98.6427	11.7778	NA
S933	WES	pbmc	40648694	37410382	5158438726	0	51	1204	98.3834	1.4184	NA
S689	WES	pbmc	46910594	43383458	5858359137	0	50	1157	98.4084	1.9694	NA
S958	WES	pbmc	66830586	55539032	7984666053	0	69	1737	98.5748	10.6328	NA
S962	WES	pbmc	49072328	43593679	6246984810	0	56	1270	98.3633	1.9755	NA
S965	WES	pbmc	85728716	76340406	10863058083	0	91	2521	98.6118	41.0272	NA
S967	WES	pbmc	54879088	46707485	6645721705	0	59	1421	98.4287	4.3082	NA
S222	WES	pbmc	41099784	37675684	5285969437	0	45	1154	98.3167	1.1566	NA
S975	WES	pbmc	25247400	23109554	3177715157	0	27	670	97.0799	0.037	NA
S981	WES	pbmc	27879108	25692816	3567385965	0	35	795	98.0784	0.0944	NA
S902	WES	pbmc	63576118	57291137	8107933103	0	73	1839	96.3549	22.6671	NA
S997	WES	pbmc	85327160	70509632	10232516449	0	89	2037	98.7019	38.6152	NA
S294	WES	pbmc	78267378	70669437	10132870968	0	96	1900	98.6451	46.1229	NA
S377	WES	pbmc	37907882	34251250	4806450941	0	41	912	98.0547	0.6334	NA
S644	WES	pbmc	22588662	20342316	2813259319	0	24	443	95.0547	0.0221	NA
S660	WES	pbmc	53653422	49360096	6667785704	0	57	1137	98.5182	4.9132	NA
S558	WES	pbmc	110466818	95560932	13647788244	0	121	2555	98.6326	67.7337	NA
S1031	WES	pbmc	26148912	22872961	3161311684	0	29	670	97.2995	0.0423	NA
S655	WES	pbmc	42639506	39535186	5326293677	0	45	1031	98.3408	1.5482	NA
S600	WES	pbmc	30855852	28616653	3955917758	0	39	874	98.1276	0.1963	NA
S844	WES	pbmc	68333110	56377499	8138609815	0	67	2177	98.4966	14.6108	NA
S1038	WES	pbmc	74929652	66104454	9206337613	0	81	2168	98.605	29.7592	NA
S832	WES	pbmc	63601762	57324443	8065493701	0	67	1701	98.4288	11.3148	NA
S942	WES	pbmc	40569162	37527221	5157369755	0	47	1081	98.4802	1.41	NA
S921	WES	pbmc	48560370	45157980	6378965756	0	54	1330	98.3891	5.6322	NA
S1050	WES	pbmc	32483104	30091475	4163170712	0	41	1069	98.1604	0.2707	NA
S909	WES	pbmc	63261056	58231916	8254595790	0	73	1580	98.5729	17.3753	NA
S1055	WES	pbmc	55461492	48963561	6984079680	0	65	1249	98.523	6.606	NA
S1015	WES	pbmc	70274062	63591539	9110974007	0	83	1858	98.5635	31.6826	NA
S651	WES	pbmc	84664854	74748585	10878893946	0	97	2561	98.5273	46.9984	NA
S1068	WES	pbmc	85021920	75549963	10642867976	0	95	2613	98.6229	45.1411	NA
S1069	WES	pbmc	60162640	53235249	7219280944	0	62	1272	98.3551	6.9491	NA
S1078	WES	pbmc	50775218	45897839	6205786679	0	55	1196	98.2964	2.992	NA
S1082	WES	pbmc	24150436	22451682	3122643252	0	31	604	97.6823	0.0719	NA
S1083	WES	pbmc	111613626	97396315	14163543127	0	121	2317	98.7906	70.7312	NA
S301	WES	pbmc	21109918	19104810	2634053624	0	22	551	93.8332	0.0302	NA
S1087	WES	pbmc	70790356	65502521	9132313764	0	83	1412	98.4097	29.6075	NA
S233	WES	pbmc	39639060	35835519	5017691289	0	42	1309	98.0295	0.7246	NA
S1094	WES	pbmc	44849898	42035534	5918145725	0	51	1466	98.3807	2.4499	NA
S1095	WES	pbmc	62970256	57321665	8285306196	0	78	1463	98.3146	22.0591	NA
S617	WES	pbmc	49091024	45015054	6005867588	0	51	1195	98.2826	3.9338	NA
S1097	WES	pbmc	48844392	43095701	6221507994	0	58	1048	98.4808	6.2942	NA
S1101	WES	pbmc	43591844	40402381	5560239057	0	51	1099	98.4125	2.6289	NA
S884	WES	pbmc	86659766	79204876	11002161603	0	108	2291	98.4626	59.2736	NA
S1111	WES	pbmc	59003056	53663622	7597347399	0	66	1575	98.4912	13.0926	NA
S690	WES	pbmc	72109342	63389963	9031590753	0	79	1876	98.2504	24.4199	NA
S173	WES	pbmc	56298450	50971937	7169708259	0	60	1343	98.3859	5.9436	NA
S024	WES	pbmc	39974906	36502571	4941986813	0	44	947	98.2917	0.8416	NA
S1149	WES	pbmc	46726182	43308615	5827221617	0	50	1084	98.3303	2.4763	NA
S1164	WES	pbmc	47600906	43845547	5927045077	0	51	1099	98.4663	2.2501	NA
S190	WES	pbmc	21358092	19198916	2653650138	0	23	523	94.3081	0.0228	NA
S019	WES	pbmc	34110860	31515258	4367115682	0	43	831	98.2276	0.4986	NA
S906	WES	pbmc	44720800	41055549	5519437524	0	47	885	98.3058	1.5428	NA
S1185	WES	pbmc	85662404	69242927	9869921174	0	90	1714	98.5598	36.4672	NA
S067	WES	pbmc	56754448	51851144	7283739381	0	61	1551	98.4128	6.8126	NA
S191	WES	pbmc	42687060	39319886	5468579550	0	45	1101	98.2031	0.9778	NA
S529	WES	pbmc	41418894	38688069	5470300819	0	46	1209	98.3383	1.0107	NA
S1193	WES	pbmc	46055500	40309674	5677949623	0	50	975	98.4002	2.1488	NA
S1194	WES	pbmc	21408430	20058018	2775720294	0	24	446	95.3664	0.0351	NA
S1195	WES	pbmc	58801260	53827261	7631686409	0	68	1482	98.5886	13.839	NA
S589	WES	pbmc	62795520	58168228	8325160761	0	78	1616	98.554	22.2921	NA
S1198	WES	pbmc	48447358	44506375	6009804832	0	52	1233	98.4647	2.3895	NA
S1206	WES	pbmc	37374164	32162584	4588579371	0	39	751	98.2561	0.2813	NA
S1213	WES	pbmc	42765162	39255663	5276510207	0	45	1031	98.365	0.9088	NA
S168	WES	pbmc	89122008	77153427	10908598630	0	101	1991	98.5734	51.7313	NA
S115	WES	pbmc	75200318	65524471	9421548304	0	86	1563	98.5212	30.78	NA
S1245	WES	pbmc	47458546	43605635	5871252685	0	51	1314	98.3487	2.3369	NA
S384	WES	pbmc	74095152	64891531	9337330593	0	87	1872	98.6458	33.6571	NA
S912	WES	pbmc	23001554	20168460	2782298428	0	25	545	96.0227	0.028	NA
S1271	WES	pbmc	23872102	20726242	2861475325	0	26	698	95.8976	0.0352	NA
S977	WES	pbmc	57102730	53185790	7655206412	0	69	1303	98.4436	11.3088	NA
S1276	WES	pbmc	43519620	39778474	5469950266	0	47	1222	98.3229	0.9653	NA
S1247	WES	pbmc	73441930	64172766	8896892658	0	76	1733	98.647	22.3258	NA
S470	WES	pbmc	44703030	40318265	5626868968	0	48	1180	98.109	1.8081	NA
S1286	WES	pbmc	39109160	35368199	4951653602	0	42	965	98.0813	0.7781	NA
S1182	WES	pbmc	73999838	65729453	9106977566	0	75	1510	98.6745	17.7022	NA
S953	WES	pbmc	66872380	59083029	8016082679	0	69	1638	98.5177	12.9259	NA
S1172	WES	pbmc	20856794	19182890	2639929715	0	22	423	95.1559	0.0218	NA
S1293	WES	pbmc	76840568	66540227	9455697057	0	79	1964	98.648	27.109	NA
S566	WES	pbmc	92029220	79372918	11334630035	0	100	2213	98.6195	50.5916	NA
S768	WES	pbmc	38536522	34911461	4917530212	0	42	974	98.0711	0.7344	NA
S441	WES	pbmc	25453096	23501203	3223613502	0	31	619	97.5056	0.0787	NA
S628	WES	pbmc	76119946	65582593	9372226706	0	82	1794	98.6799	31.7476	NA
S1311	WES	pbmc	58137044	53533432	7564080991	0	67	1346	98.4523	11.567	NA
S132	WES	pbmc	43354890	39926291	5785749415	0	53	1069	98.1599	1.1267	NA
S427	WES	pbmc	80613476	69264307	9858009546	0	85	2083	98.5183	35.0085	NA
S1329	WES	pbmc	55404950	48499940	6823893256	0	60	1245	98.5461	8.3227	NA
S202	WES	pbmc	26168906	24075177	3302134223	0	32	586	97.792	0.0975	NA
S102	WES	pbmc	48553274	44852353	6031678466	0	52	1230	98.4462	2.4856	NA
S337	WES	pbmc	58256116	53139560	7533729545	0	66	1408	98.5291	12.2669	NA
S1201	WES	pbmc	61015422	53632257	7565863407	0	64	1500	98.5271	12.2668	NA
S128	WES	pbmc	59148146	52379811	7526227393	0	67	1807	98.4924	14.8132	NA
S800	WES	pbmc	71377986	62878840	8657258534	0	74	1782	98.6156	20.4513	NA
S1348	WES	pbmc	62801870	51424334	7404302621	0	65	1614	98.5807	10.3122	NA
S372	WES	pbmc	70274062	63591539	9110974007	0	83	1858	98.5635	31.6826	NA
S1208	WES	pbmc	64695684	58290340	7768646973	0	65	1494	98.5653	9.4928	NA
S1360	WES	pbmc	32534610	29209885	4132454296	0	36	909	97.9863	0.2263	NA
S1336	WES	pbmc	112290924	98364326	14317030421	0	123	2263	98.8142	71.8528	NA
S1368	WES	pbmc	42915168	37775070	5456334142	0	49	1300	98.2764	0.902	NA
S447	WES	pbmc	165057096	140200676	19889982143	0	174	3498	98.4175	90.141	NA
S623	WES	pbmc	107981444	98953172	13163256087	0	122	2253	98.5117	70.902	NA
S1023	WES	pbmc	62971688	57915160	8193116873	0	72	1983	98.5729	17.4795	NA
S495	WES	pbmc	72099816	63697730	8982215637	0	80	2193	98.5384	27.862	NA
S541	WES	pbmc	36149332	33222425	4559448832	0	44	1045	98.4064	0.7925	NA
S1326	WES	pbmc	98250596	90018474	12005262138	0	111	2238	98.4969	61.1634	NA
S442	WES	pbmc	51619924	46448376	6575401572	0	57	1571	98.5101	4.2548	NA
S1187	WES	pbmc	46970342	44049709	6205627510	0	53	1284	98.363	3.1951	NA
S1296	WES	pbmc	112290924	98364326	14317030421	0	123	2263	98.8142	71.8528	NA
S1144	WES	pbmc	23821934	21800055	3000709048	0	26	625	96.7154	0.0301	NA
S1324	WES	pbmc	61469936	51078887	7366996837	0	61	1238	98.5726	8.576	NA
S448	WES	pbmc	26567124	24553914	3352869810	0	33	780	95.2864	0.2097	NA
S1408	WES	pbmc	87964644	78010301	10987068820	0	98	2407	98.5484	48.3433	NA
S737	WES	pbmc	50605596	46497667	6254712819	0	54	1354	98.3875	3.4888	NA
S971	WES	pbmc	32658060	30012476	4151750616	0	41	952	98.146	0.2236	NA
S1318	WES	pbmc	50891746	46950232	6322370903	0	54	1324	98.4649	3.552	NA
S552	WES	pbmc	66195044	59121129	8129957353	0	67	1418	98.5191	9.3852	NA
S356	WES	pbmc	48892206	45091649	6222820108	0	61	1343	98.3381	5.5555	NA
S1458	WES	pbmc	63982172	59414574	8335121875	0	76	1343	98.3762	22.1398	NA
S331	WES	pbmc	30429252	28265147	3915185588	0	39	722	98.1436	0.162	NA
S064	WES	pbmc	75200318	65524471	9421548304	0	86	1563	98.5212	30.78	NA
S225	WES	pbmc	52320270	47307647	6585694895	0	59	1480	98.5554	4.4415	NA
S110	WES	pbmc	47316132	43642685	5866679501	0	50	1098	98.4408	2.2133	NA
S1471	WES	pbmc	80613476	69264307	9858009546	0	85	2083	98.5183	35.0085	NA
S1479	WES	pbmc	59541288	54236890	7828381642	0	74	1229	98.1121	16.668	NA
S1501	WES	pbmc	64149936	58978227	8415969105	0	73	1846	98.4732	17.216	NA
S1463	WES	pbmc	26553152	23078163	3164727436	0	29	622	96.7945	0.0448	NA
S1505	WES	pbmc	65918370	57820554	8217260579	0	71	1474	98.3752	14.9972	NA
S1338	WES	pbmc	52768008	46976240	6257336231	0	54	1379	98.3406	2.8393	NA
S1511	WES	pbmc	33695724	31029312	4289644774	0	42	982	98.152	0.425	NA
S1516	WES	pbmc	51540384	47442236	6433242116	0	56	1098	98.418	3.7037	NA
S1150	WES	pbmc	47952208	40806383	5837099811	0	55	968	98.2764	1.4586	NA
S664	WES	pbmc	44530946	41640464	5880071957	0	50	1469	98.4251	2.6256	NA
S219	WES	pbmc	58228094	53121130	7672388706	0	73	1209	98.0494	14.2668	NA
S603	WES	pbmc	58446990	54002895	7638783469	0	67	1230	98.4756	10.6865	NA
S293	WES	pbmc	24024288	22079579	3031116642	0	26	596	96.9473	0.0338	NA
S938	WES	pbmc	63881932	58984376	8337516725	0	73	1371	98.5747	18.7916	NA
S295	WES	pbmc	50389446	46555789	6327787447	0	55	1021	98.407	3.3902	NA
S084	WES	pbmc	60957286	55470012	7844483497	0	74	1354	98.1338	17.0252	NA
S964	WES	pbmc	70070546	61289531	8829655409	0	83	1706	98.5211	26.7707	NA
S1534	WES	pbmc	23329818	21355344	2935539253	0	25	563	96.5904	0.028	NA
S819	WES	pbmc	97496626	86331603	12149629046	0	108	2447	98.6898	58.0551	NA
S745	WES	pbmc	34411100	31647285	4343667753	0	42	812	98.2824	0.569	NA
S1549	WES	pbmc	63304954	57944620	8189036031	0	71	1634	97.9913	18.1894	NA
S217	WES	pbmc	52936248	49415169	6994308517	0	59	1454	98.5381	7.7307	NA
S761	WES	pbmc	65722852	58670590	8211444237	0	72	1671	98.4966	19.8559	NA
S937	WES	pbmc	62352256	55008188	7594849358	0	67	1536	98.4675	11.2483	NA
S1557	WES	pbmc	163389808	139361300	19833360486	0	174	3382	98.2721	90.3886	NA
S125	WES	pbmc	156151408	133155441	19022176046	0	166	4088	98.2453	88.4082	NA
S1570	WES	pbmc	47941996	44320254	5995853162	0	52	1284	98.3698	2.456	NA
S1477	WES	pbmc	86595600	78999923	11020116671	0	94	2046	98.5638	44.3918	NA
S1080	WES	pbmc	67933548	61349152	8633155926	0	72	1585	98.4727	17.3385	NA
S1529	WES	pbmc	51823390	48054530	6949492897	0	63	1507	98.3709	5.4922	NA
S671	WES	pbmc	19540530	17106973	2352502803	0	20	434	92.1687	0.0232	NA
S1579	WES	pbmc	33499278	30781246	4230033814	0	40	826	98.3071	0.4429	NA
S490	WES	pbmc	21551806	18913009	2605538771	0	24	523	95.0109	0.0298	NA
S666	WES	pbmc	152218612	130061199	18635182528	0	163	3689	98.3588	86.8048	NA
S1609	WES	pbmc	66645264	61770078	8664145666	0	79	1346	98.4896	24.9292	NA
S1062	WES	pbmc	72135790	65950271	9213379320	0	79	1431	98.5915	26.5909	NA
S195	WES	pbmc	66037678	58582478	8195297419	0	75	1599	98.4731	24.192	NA
S654	WES	pbmc	24837968	21671385	2998938791	0	28	613	96.9411	0.0402	NA
S1575	WES	pbmc	75332514	69465490	9239008854	0	86	1834	98.4013	32.8747	NA
S1283	WES	pbmc	39276872	36145792	5034643652	0	50	1226	98.3743	1.1277	NA
S562	WES	pbmc	33541056	30500969	4277474280	0	36	898	97.8635	0.3244	NA
S982	WES	pbmc	67441104	59545229	8043945778	0	72	1326	98.3252	11.0527	NA
S1606	WES	pbmc	36327926	31382289	4315196799	0	37	793	98.2411	0.1576	NA
S1508	WES	pbmc	24214908	21692590	2991794650	0	26	633	96.4999	0.0356	NA
S149	WES	pbmc	23964176	22115223	3032852355	0	29	742	97.3053	0.0597	NA
S634	WES	pbmc	33300012	30698343	4267608384	0	42	1181	98.2587	0.3224	NA
S1642	WES	pbmc	56581412	49600298	7093971126	0	63	1558	98.4258	5.091	NA
S851	WES	pbmc	22753296	20894048	2865737149	0	24	462	96.0292	0.0243	NA
S1665	WES	pbmc	53522406	49334838	6666103548	0	57	1471	98.5005	4.836	NA
S1545	WES	pbmc	30333872	27953661	3836444285	0	38	728	97.968	0.2138	NA
S1678	WES	pbmc	40363648	37923078	5323073630	0	46	1084	98.4326	1.0536	NA
S1061	WES	pbmc	48639516	45013198	6107093278	0	53	1122	98.4956	2.6784	NA
S422	WES	pbmc	54872144	49124203	6681348439	0	60	1092	98.4309	5.5576	NA
S1650	WES	pbmc	42687060	39319886	5468579550	0	45	1101	98.2031	0.9778	NA
S911	WES	pbmc	99172992	90748947	12092639060	0	112	2374	98.472	63.3625	NA
S1699	WES	pbmc	33475932	30758059	4255089202	0	42	821	98.1657	0.4417	NA
S1120	WES	pbmc	68338652	60939876	8520468938	0	78	1829	98.4931	26.4074	NA
S889	WES	pbmc	32621136	30155782	4173674810	0	41	937	98.2309	0.2493	NA
S1449	WES	pbmc	25387538	22112767	3061847456	0	28	546	96.9088	0.0393	NA
S1436	WES	pbmc	67714176	60175577	8421532459	0	77	1572	98.5228	24.9525	NA
S776	WES	pbmc	72785842	61688743	8854456768	0	83	1904	98.5866	28.9795	NA
S387	WES	pbmc	41598282	38072179	5279915060	0	46	886	98.35	0.7762	NA
S854	WES	pbmc	117181214	91878218	13090275551	0	117	2687	98.7545	67.1834	NA
S1142	WES	pbmc	57873436	53236297	7397849265	0	61	1236	98.2462	7.4337	NA
S1615	WES	pbmc	43511686	38206183	5517504959	0	49	1263	98.2091	0.937	NA
S546	WES	pbmc	57155874	52436388	7408635452	0	65	1566	97.834	11.6235	NA
S005	UMIseq	pbmc	41076208	2678568	316940506	847	12541	16754	NA	100	99.984
S009	UMIseq	pbmc	54159448	8044686	868381483	1078	39319	60936	NA	100	100
S012	UMIseq	pbmc	35895800	4527532	533339342	815	21492	28666	NA	100	99.968
S015	UMIseq	pbmc	12035464	1138576	136104305	346	5515	7610	NA	100	99.7038
S023	UMIseq	pbmc	55030819	3071472	357699324	767	14236	18576	NA	100	99.96
S042	UMIseq	pbmc	31072100	4310828	510728851	720	20761	28435	NA	100	99.968
S043	UMIseq	pbmc	59211814	1353032	152342316	318	6647	8316	NA	100	99.2475
S046	UMIseq	pbmc	51118676	3436566	402557737	851	16279	22306	NA	100	99.968
S052	UMIseq	pbmc	48058034	3837568	462305848	720	17505	24851	NA	100	99.96
S057	UMIseq	pbmc	77043408	1486606	168001468	344	7605	9828	NA	100	98.1427
S061	UMIseq	pbmc	141660762	5760354	710187961	1236	23658	29865	NA	100	100
S062	UMIseq	pbmc	37677064	5408876	647188449	1067	26521	36274	NA	100	100
S065	UMIseq	pbmc	40130881	4274922	503535076	833	19596	25537	NA	100	99.968
S078	UMIseq	pbmc	56343173	1111336	125112420	248	5320	6445	NA	100	99.0873
S092	UMIseq	pbmc	49492314	988684	112079305	194	5052	6443	NA	100	97.5743
S096	UMIseq	pbmc	58352613	1144878	127880807	225	5756	7168	NA	100	97.7904
S099	UMIseq	pbmc	37410226	2688941	317243825	849	12619	16769	NA	100	99.976
S101	UMIseq	pbmc	91350741	7179708	884285506	1466	31188	48488	NA	100	100
S106	UMIseq	pbmc	27612711	3394093	413608610	673	16438	23819	NA	100	99.96
S108	UMIseq	pbmc	36900151	3181443	373051055	523	14318	19682	NA	100	99.944
S109	UMIseq	pbmc	54382798	4985824	463704384	550	21359	32393	NA	100	99.944
S112	UMIseq	pbmc	27180277	2247160	264354474	331	9857	12473	NA	100	99.8399
S114	UMIseq	pbmc	39698579	3929440	367799420	395	17339	26175	NA	100	99.9279
S126	UMIseq	pbmc	21284035	3995070	487208661	644	19866	37213	NA	100	99.952
S133	UMIseq	pbmc	42352644	4858436	569490828	917	22841	28931	NA	100	99.984
S134	UMIseq	pbmc	44978573	3293484	405585689	733	14580	20205	NA	100	99.968
S141	UMIseq	pbmc	52474618	3297634	386464996	837	15504	21077	NA	100	99.968
S143	UMIseq	pbmc	56424244	4931382	465895011	540	21283	31041	NA	100	99.944
S146	UMIseq	pbmc	59986767	4907694	534783027	242	23890	31415	NA	100	99.4156
S147	UMIseq	pbmc	46723448	4569662	498340344	211	22199	32426	NA	100	99.6317
S148	UMIseq	pbmc	30616505	4273410	454163548	63	21480	34805	NA	99.8799	99.0633
S163	UMIseq	pbmc	26855790	2891498	339799106	496	13415	17519	NA	100	99.944
S170	UMIseq	pbmc	110622881	5078728	612648214	1045	21361	28146	NA	100	100
S171	UMIseq	pbmc	58842603	1066084	120598485	234	5427	7026	NA	100	97.7104
S172	UMIseq	pbmc	35293906	2703004	319546456	792	12760	17350	NA	100	99.976
S176	UMIseq	pbmc	32946519	2588622	300934783	456	11584	14243	NA	100	99.8959
S189	UMIseq	pbmc	1990083	301320	37876012	43	1589	2830	NA	99.944	91.1536
S194	UMIseq	pbmc	49431530	615412	69732558	65	2904	3513	NA	99.8319	96.9658
S196	UMIseq	pbmc	25201510	3209652	393772648	635	15338	21832	NA	100	99.952
S199	UMIseq	pbmc	38348252	2716646	324557038	840	12907	16791	NA	100	99.984
S205	UMIseq	pbmc	27854008	2560138	297133153	375	11379	15646	NA	100	99.8719
S221	UMIseq	pbmc	81821372	5167834	490280782	646	22286	30832	NA	100	99.952
S226	UMIseq	pbmc	32451993	3002336	363847654	909	14595	20756	NA	100	99.992
S232	UMIseq	pbmc	38154029	3601764	426450866	676	16594	20760	NA	100	99.96
S242	UMIseq	pbmc	38179715	2265276	267139318	632	10490	13489	NA	100	99.936
S247	UMIseq	pbmc	26387551	3158680	379043118	840	15716	24761	NA	100	99.984
S253	UMIseq	pbmc	64689374	4083112	506626148	827	17349	24886	NA	100	99.992
S255	UMIseq	pbmc	68842843	4043944	494134305	1006	17322	23061	NA	100	100
S257	UMIseq	pbmc	5174921	462182	55365071	102	2148	2859	NA	100	97.3261
S261	UMIseq	pbmc	44997711	3341036	397877478	819	15858	21320	NA	100	99.968
S262	UMIseq	pbmc	72355429	5767808	597605383	834	27520	38156	NA	100	99.9119
S266	UMIseq	pbmc	50858677	4622252	431832474	488	19878	31069	NA	100	99.944
S271	UMIseq	pbmc	28045432	2674824	313004831	210	12108	15403	NA	100	99.1594
S276	UMIseq	pbmc	90862350	8565671	890951261	528	40292	55745	NA	100	99.8559
S286	UMIseq	pbmc	29811463	3321916	393722700	586	15559	20240	NA	100	99.952
S287	UMIseq	pbmc	38279084	4216104	455603644	97	21354	29405	NA	99.952	99.0873
S300	UMIseq	pbmc	23116214	2313364	278848636	404	10723	14944	NA	100	99.8559
S302	UMIseq	pbmc	44117844	3593630	416458695	682	15327	21088	NA	100	99.96
S303	UMIseq	pbmc	49468766	8067068	977860988	1756	41410	72499	NA	100	100
S305	UMIseq	pbmc	14164005	1687002	206860014	372	8731	14406	NA	100	99.7438
S310	UMIseq	pbmc	107483867	1574174	178285298	170	7642	9847	NA	100	99.1834
S312	UMIseq	pbmc	38927303	8786990	967444691	135	47088	82679	NA	100	99.4156
S317	UMIseq	pbmc	33653123	2972956	353839625	862	14348	19415	NA	100	99.984
S324	UMIseq	pbmc	33607572	2658940	312565527	791	12727	17052	NA	100	99.968
S325	UMIseq	pbmc	38394561	4052302	418608316	393	19543	29038	NA	100	99.7118
S327	UMIseq	pbmc	74475558	6213452	753006845	1110	27643	39566	NA	100	100
S330	UMIseq	pbmc	32630013	2864662	342206633	802	13830	18959	NA	100	99.968
S340	UMIseq	pbmc	2373789	366214	43889701	55	1873	3589	NA	99.952	96.7176
S342	UMIseq	pbmc	29020088	2194519	260752511	650	10358	14504	NA	100	99.96
S346	UMIseq	pbmc	41059844	3218879	386222748	992	15339	20674	NA	100	99.992
S349	UMIseq	pbmc	36927948	2835810	341819711	878	13670	18236	NA	100	99.984
S355	UMIseq	pbmc	47304187	3373466	397946039	834	16151	22448	NA	100	99.968
S366	UMIseq	pbmc	122527455	4816546	501219537	715	21079	29785	NA	100	99.4956
S375	UMIseq	pbmc	37782136	4118332	486013161	734	18972	25249	NA	100	99.968
S388	UMIseq	pbmc	35799103	3689166	428377211	650	16573	22997	NA	100	99.96
S389	UMIseq	pbmc	27778678	2006212	239113714	590	9552	12089	NA	100	99.944
S390	UMIseq	pbmc	56486771	8303508	792117757	712	36578	65229	NA	100	99.96
S391	UMIseq	pbmc	88093474	5603484	530557218	656	23718	34179	NA	100	99.952
S400	UMIseq	pbmc	32123844	3152084	372322447	581	14434	17979	NA	100	99.944
S402	UMIseq	pbmc	59878370	5416772	570882646	61	25890	36136	NA	99.8879	99.2875
S405	UMIseq	pbmc	64291393	11077242	1051265861	751	47799	103210	NA	100	99.968
S408	UMIseq	pbmc	163558687	6814238	739196006	1171	30864	44685	NA	100	100
S411	UMIseq	pbmc	2332053	350958	42554368	72	1793	3480	NA	99.968	95.7569
S414	UMIseq	pbmc	63736960	4520660	418563629	559	19508	27731	NA	100	99.944
S416	UMIseq	pbmc	36679506	2779692	318301552	516	11626	15723	NA	100	99.9279
S419	UMIseq	pbmc	28284266	3023384	353865765	455	13593	19246	NA	100	99.9279
S421	UMIseq	pbmc	39016308	2286302	265385963	561	10718	14325	NA	100	99.8959
S425	UMIseq	pbmc	65282302	1234634	137553030	333	5946	7137	NA	100	99.3996
S434	UMIseq	pbmc	65223161	4286666	403631739	531	18567	26416	NA	100	99.944
S438	UMIseq	pbmc	89244360	5611496	677303640	1087	24231	33876	NA	100	100
S444	UMIseq	pbmc	12532363	1399952	171014837	294	7181	11180	NA	100	99.7358
S450	UMIseq	pbmc	51243699	3074624	359243377	554	12879	16435	NA	100	99.944
S453	UMIseq	pbmc	32898130	4377178	514189139	834	21166	27983	NA	100	99.968
S455	UMIseq	pbmc	43012943	4857700	463653147	472	21435	36897	NA	100	99.944
S457	UMIseq	pbmc	35008632	4411574	516936753	791	20981	27355	NA	100	99.968
S458	UMIseq	pbmc	21788353	2006860	236561351	339	9200	12658	NA	100	99.8159
S469	UMIseq	pbmc	37236703	4086450	484336291	737	18899	24783	NA	100	99.968
S475	UMIseq	pbmc	67832807	2694532	316308015	620	12163	15575	NA	100	99.952
S477	UMIseq	pbmc	34369097	4871144	492161029	516	22423	33547	NA	100	99.944
S479	UMIseq	pbmc	39860520	5909900	693086041	1063	28045	41818	NA	100	100
S483	UMIseq	pbmc	88189035	7047158	725295169	1001	28967	45189	NA	100	100
S484	UMIseq	pbmc	73800051	4883834	585913244	936	21162	27650	NA	100	99.992
S488	UMIseq	pbmc	32286537	2237070	266058345	636	10498	14295	NA	100	99.96
S497	UMIseq	pbmc	42695734	2996462	356801216	841	14159	20147	NA	100	99.984
S498	UMIseq	pbmc	40577365	2641461	314896077	851	12298	16370	NA	100	99.976
S499	UMIseq	pbmc	37043693	4373476	511931489	739	20501	27259	NA	100	99.968
S505	UMIseq	pbmc	67323073	8178590	858775142	447	39714	60855	NA	100	99.8239
S510	UMIseq	pbmc	50098328	3503270	412387632	1005	16762	22829	NA	100	100
S512	UMIseq	pbmc	35334578	4394488	514530800	667	20530	27295	NA	100	99.96
S514	UMIseq	pbmc	40905183	3086867	373432583	768	14814	20139	NA	100	99.96
S522	UMIseq	pbmc	109681116	6125886	627239645	1064	24614	32610	NA	100	100
S524	UMIseq	pbmc	105271275	5240360	616175772	1145	23442	32389	NA	100	100
S527	UMIseq	pbmc	37725146	3119054	376666230	894	14877	20409	NA	100	99.984
S536	UMIseq	pbmc	42213901	3452584	401279576	638	14825	19786	NA	100	99.96
S539	UMIseq	pbmc	30902145	3247190	385824974	536	14927	19846	NA	100	99.944
S540	UMIseq	pbmc	60844009	8355800	1010092450	2584	42705	65216	NA	100	100
S543	UMIseq	pbmc	95396004	8196616	1006124943	1521	36727	52776	NA	100	100
S545	UMIseq	pbmc	33761847	4024841	479158036	749	19164	25220	NA	100	99.968
S550	UMIseq	pbmc	36728014	3972504	467088001	290	18695	24081	NA	100	99.3115
S553	UMIseq	pbmc	42777526	3241814	383854955	821	15671	19970	NA	100	99.968
S554	UMIseq	pbmc	36654403	4506637	534173416	737	21140	28705	NA	100	99.968
S555	UMIseq	pbmc	46808005	2422870	288562706	768	10943	13888	NA	100	99.968
S559	UMIseq	pbmc	91406710	1669624	185448625	344	7851	9723	NA	100	99.6397
S563	UMIseq	pbmc	32675415	4277510	448970067	114	21315	32128	NA	100	99.1674
S576	UMIseq	pbmc	55646874	4176260	500140941	780	18974	25190	NA	100	99.968
S577	UMIseq	pbmc	34235147	3383022	404512367	544	15283	21320	NA	100	99.944
S588	UMIseq	pbmc	40086706	4029276	475414429	688	18278	24592	NA	100	99.96
S592	UMIseq	pbmc	48732995	4906604	561947512	851	21659	30764	NA	100	99.992
S595	UMIseq	pbmc	66493714	3777092	441269159	733	15766	21251	NA	100	99.968
S597	UMIseq	pbmc	131427794	7378324	742437645	1110	29010	39018	NA	100	100
S601	UMIseq	pbmc	55910671	4688842	486202635	251	21986	30918	NA	100	99.6157
S606	UMIseq	pbmc	24715064	1049978	127501406	202	4232	5997	NA	100	99.6157
S614	UMIseq	pbmc	43458237	3844594	463988349	716	17430	23634	NA	100	99.968
S622	UMIseq	pbmc	50089210	3829770	461907401	785	17381	23917	NA	100	99.96
S625	UMIseq	pbmc	108316702	3331456	328297625	519	14021	18149	NA	100	99.3515
S632	UMIseq	pbmc	36815889	4214740	497248377	708	19530	26581	NA	100	99.96
S647	UMIseq	pbmc	80496099	7449924	785485475	376	35323	52458	NA	100	99.7999
S653	UMIseq	pbmc	27709105	2309354	272434735	576	11200	15253	NA	100	99.936
S662	UMIseq	pbmc	127964991	4874202	473306677	742	20524	28618	NA	100	99.7118
S663	UMIseq	pbmc	30680260	3318478	385398333	578	15125	20750	NA	100	99.944
S673	UMIseq	pbmc	125728878	4521756	548604220	963	18459	24497	NA	100	99.992
S675	UMIseq	pbmc	34999806	4187552	454248611	118	20966	33321	NA	100	99.0713
S676	UMIseq	pbmc	42862488	3247102	386614121	781	15557	20442	NA	100	99.968
S685	UMIseq	pbmc	29635174	4603974	551958520	62	23866	57322	NA	99.9039	99.5197
S687	UMIseq	pbmc	47592779	3164314	370566908	836	14974	19761	NA	100	99.968
S697	UMIseq	pbmc	44234326	4331720	469612209	167	21374	28845	NA	100	99.3435
S699	UMIseq	pbmc	87681550	5513690	561617434	49	24607	33894	NA	99.8719	99.3515
S705	UMIseq	pbmc	86227102	3663460	440020561	658	14629	18478	NA	100	99.96
S706	UMIseq	pbmc	59255021	5403696	577319478	235	26116	36586	NA	100	99.6558
S713	UMIseq	pbmc	45513313	3217240	358538189	889	14674	20239	NA	100	99.984
S715	UMIseq	pbmc	33940387	743894	84426107	177	3568	4266	NA	100	98.3908
S720	UMIseq	pbmc	51912166	3945430	462553693	1071	19169	25131	NA	100	100
S721	UMIseq	pbmc	30337078	4185442	498361697	984	20983	34181	NA	100	99.992
S722	UMIseq	pbmc	35827916	4406734	519397786	669	20703	28184	NA	100	99.96
S723	UMIseq	pbmc	25168230	2571274	296148548	381	11452	16789	NA	100	99.8719
S729	UMIseq	pbmc	33505102	3997418	462929791	690	18615	24848	NA	100	99.96
S730	UMIseq	pbmc	34358293	2356596	269552681	468	9574	12946	NA	100	99.8879
S734	UMIseq	pbmc	47344200	5504182	519106184	560	24627	37489	NA	100	99.944
S747	UMIseq	pbmc	32830789	2671118	306878267	737	12519	16918	NA	100	99.968
S750	UMIseq	pbmc	43043466	3262812	378396775	673	15592	21782	NA	100	99.952
S753	UMIseq	pbmc	37185473	4158656	443500789	130	20539	28640	NA	100	99.5277
S754	UMIseq	pbmc	74132883	6016544	738395755	1271	26949	36614	NA	100	100
S755	UMIseq	pbmc	53970578	5637566	608383728	252	27763	39882	NA	100	99.4556
S757	UMIseq	pbmc	32170770	4067074	484676695	676	19094	25818	NA	100	99.96
S762	UMIseq	pbmc	39106623	4174100	448105491	171	20332	29720	NA	100	99.5277
S764	UMIseq	pbmc	36747037	3853666	468391329	737	17842	25260	NA	100	99.968
S778	UMIseq	pbmc	43641592	1051182	116028906	235	4898	6004	NA	100	99.0873
S779	UMIseq	pbmc	35925331	4693471	528872716	730	22155	29271	NA	100	99.968
S781	UMIseq	pbmc	66190471	4189954	516636043	937	18163	24603	NA	100	99.992
S783	UMIseq	pbmc	15827008	1424582	173206505	304	7256	10991	NA	100	99.7118
S787	UMIseq	pbmc	17118420	2121562	256434335	592	10725	15620	NA	100	99.944
S791	UMIseq	pbmc	46358473	2808006	330766740	668	13241	18250	NA	100	99.944
S802	UMIseq	pbmc	59703272	5198163	536540369	583	24610	35926	NA	100	99.7999
S807	UMIseq	pbmc	18919656	3598946	439421543	601	18313	29166	NA	100	99.952
S809	UMIseq	pbmc	43083890	4092154	432634616	650	18408	25734	NA	100	99.952
S821	UMIseq	pbmc	3484047	287450	34847142	76	1439	2098	NA	99.96	89.5365
S823	UMIseq	pbmc	49789267	2982318	339419733	776	13649	18005	NA	100	99.96
S826	UMIseq	pbmc	30972837	4278814	499537863	762	20492	31300	NA	100	99.968
S831	UMIseq	pbmc	31314599	4424904	520744918	730	23875	36564	NA	100	99.968
S836	UMIseq	pbmc	8407639	613666	72043714	105	2738	3595	NA	100	99.0873
S837	UMIseq	pbmc	48217008	3355830	400631706	699	14490	19603	NA	100	99.96
S838	UMIseq	pbmc	68692361	1596292	182231831	342	7778	9837	NA	100	99.4476
S843	UMIseq	pbmc	60911700	1293512	145459575	261	6213	7569	NA	100	99.1914
S847	UMIseq	pbmc	92197698	1683459	187556337	419	8143	9898	NA	100	99.6798
S853	UMIseq	pbmc	53529288	4962280	512615066	547	23200	35336	NA	100	99.7758
S855	UMIseq	pbmc	54767871	1379907	156694331	296	6723	8584	NA	100	99.2955
S858	UMIseq	pbmc	28265154	3147660	377247936	861	15675	22665	NA	100	99.984
S859	UMIseq	pbmc	45184254	5553818	672636564	1074	26946	41079	NA	100	100
S866	UMIseq	pbmc	39917769	3141948	374111804	899	15015	20938	NA	100	99.984
S867	UMIseq	pbmc	53088894	1063034	118618574	251	5449	6743	NA	100	97.6703
S873	UMIseq	pbmc	42279059	3597613	420563809	832	17344	23319	NA	100	99.968
S880	UMIseq	pbmc	57605156	4429816	476220838	224	21113	28433	NA	100	99.5997
S890	UMIseq	pbmc	36943247	4057432	479292196	680	18653	24157	NA	100	99.96
S891	UMIseq	pbmc	40239122	4745418	558539267	752	22097	31133	NA	100	99.968
S895	UMIseq	pbmc	32744169	3198082	377278206	231	14604	19619	NA	100	99.1754
S904	UMIseq	pbmc	48901922	3540094	408896982	755	14475	20642	NA	100	99.968
S916	UMIseq	pbmc	77468222	4628562	574064506	964	19779	27806	NA	100	99.992
S924	UMIseq	pbmc	40104592	3058008	367997447	754	14562	19448	NA	100	99.96
S929	UMIseq	pbmc	51816040	4231624	399111980	549	18357	26122	NA	100	99.944
S931	UMIseq	pbmc	42512470	3467774	327694283	424	15456	21970	NA	100	99.9279
S939	UMIseq	pbmc	36136899	2832550	325560194	588	11975	15685	NA	100	99.936
S941	UMIseq	pbmc	33478864	2710648	326420020	822	12866	17811	NA	100	99.976
S944	UMIseq	pbmc	47766910	3486868	362926027	251	16290	23201	NA	100	99.6077
S947	UMIseq	pbmc	31943697	5987992	713996789	950	30290	44028	NA	100	99.992
S949	UMIseq	pbmc	68044225	1260970	139913543	329	6081	7264	NA	100	99.3275
S959	UMIseq	pbmc	29433296	3276304	385869453	532	15298	21297	NA	100	99.944
S960	UMIseq	pbmc	20552238	2018238	237156798	589	9864	13850	NA	100	99.936
S961	UMIseq	pbmc	67907877	6991478	731837712	345	33371	50070	NA	100	99.7838
S969	UMIseq	pbmc	33967469	3731678	443874811	704	17440	21557	NA	100	99.968
S974	UMIseq	pbmc	54276111	4641856	442494600	455	20224	30914	NA	100	99.944
S976	UMIseq	pbmc	93312610	3607654	375630240	499	15803	22492	NA	100	99.3035
S980	UMIseq	pbmc	79589916	4563282	569722632	1007	19337	26513	NA	100	100
S983	UMIseq	pbmc	31639696	3073922	352741427	536	13510	19254	NA	100	99.9279
S993	UMIseq	pbmc	45590106	2991328	335490648	599	13645	18395	NA	100	99.944
S995	UMIseq	pbmc	28759035	3619238	436964728	638	17340	25671	NA	100	99.96
S999	UMIseq	pbmc	65825271	849786	97143186	97	4146	5083	NA	99.976	98.3588
S1001	UMIseq	pbmc	35980656	3348760	404958720	566	15098	20924	NA	100	99.944
S1002	UMIseq	pbmc	33991345	3742653	438860267	260	17662	22266	NA	100	99.3195
S1005	UMIseq	pbmc	35284856	3448524	391277945	981	16647	23289	NA	100	99.992
S1007	UMIseq	pbmc	38291154	3629322	347826074	393	16003	24461	NA	100	99.8959
S1009	UMIseq	pbmc	2218835	322480	40162718	80	1681	3003	NA	99.968	93.9957
S1013	UMIseq	pbmc	54901729	1459102	162960461	331	7024	8953	NA	100	99.4316
S1018	UMIseq	pbmc	48622372	1022954	115379992	261	4896	5976	NA	100	98.9913
S1022	UMIseq	pbmc	14637785	1081327	128988830	201	4846	6351	NA	100	99.6077
S1025	UMIseq	pbmc	32221364	2881574	344014359	681	12560	18039	NA	100	99.96
S1026	UMIseq	pbmc	36524386	2607574	303296050	571	12375	16820	NA	100	99.9279
S1030	UMIseq	pbmc	76402768	1054566	119743366	95	5155	6369	NA	99.984	98.7591
S1033	UMIseq	pbmc	36777297	1826066	214172849	484	8467	10931	NA	100	99.8719
S1039	UMIseq	pbmc	34020292	4023256	481637129	817	18644	28951	NA	100	99.984
S1053	UMIseq	pbmc	62550679	1183826	131714007	253	5596	6853	NA	100	99.3035
S1064	UMIseq	pbmc	36013760	4759840	566176851	876	22760	31542	NA	100	99.984
S1065	UMIseq	pbmc	51174279	4088464	491128429	706	18500	27024	NA	100	99.96
S1075	UMIseq	pbmc	52185438	2743652	341023217	592	11624	15174	NA	100	99.952
S1076	UMIseq	pbmc	26933859	2123968	252088714	643	10165	14497	NA	100	99.952
S1077	UMIseq	pbmc	32680052	3312926	390345425	514	15010	21570	NA	100	99.944
S1079	UMIseq	pbmc	32053332	2598306	303599598	721	12490	16596	NA	100	99.968
S1089	UMIseq	pbmc	27926525	2629142	312965896	661	12708	18085	NA	100	99.96
S1096	UMIseq	pbmc	47846956	3004256	362110057	604	13008	16223	NA	100	99.952
S1098	UMIseq	pbmc	82252093	4047720	462914079	737	16275	20947	NA	100	99.968
S1099	UMIseq	pbmc	82235394	3381540	347970972	48	14845	19156	NA	99.7999	99.0473
S1102	UMIseq	pbmc	140636502	5689570	584422357	962	24689	32330	NA	100	99.8719
S1104	UMIseq	pbmc	38136346	4262936	506071064	796	19986	26013	NA	100	99.968
S1108	UMIseq	pbmc	67496140	3847532	457672150	694	16181	21004	NA	100	99.968
S1110	UMIseq	pbmc	35181239	3443274	403292468	303	15897	20548	NA	100	99.3115
S1112	UMIseq	pbmc	48218016	3804168	428907951	697	18122	25051	NA	100	99.96
S1119	UMIseq	pbmc	65641059	4063970	497738764	938	17449	25039	NA	100	99.992
S1122	UMIseq	pbmc	74306237	3315058	416079673	727	13781	17826	NA	100	99.968
S1125	UMIseq	pbmc	36037720	3702629	371672466	491	16564	22044	NA	100	99.944
S1126	UMIseq	pbmc	74852255	5713550	686909169	1058	25512	36225	NA	100	100
S1129	UMIseq	pbmc	28212658	4067308	483975446	695	20108	26784	NA	100	99.96
S1131	UMIseq	pbmc	48351285	4909824	492181556	244	23073	32180	NA	100	99.6397
S1138	UMIseq	pbmc	55385563	4715192	452144252	594	21043	29927	NA	100	99.944
S1140	UMIseq	pbmc	53084023	3629698	419775943	913	17262	23138	NA	100	99.984
S1148	UMIseq	pbmc	97075697	4665200	542543124	985	20420	27136	NA	100	99.992
S1153	UMIseq	pbmc	37339556	3070184	347623574	605	12801	18380	NA	100	99.944
S1159	UMIseq	pbmc	39339377	4131130	437920696	622	18929	27278	NA	100	99.952
S1161	UMIseq	pbmc	38710389	4436588	524997982	747	20550	28411	NA	100	99.968
S1168	UMIseq	pbmc	71055637	7065120	732464230	397	33121	52235	NA	100	99.7999
S1174	UMIseq	pbmc	75352604	7341012	758530248	959	34766	53628	NA	100	99.992
S1177	UMIseq	pbmc	64678476	4115304	494993263	790	17510	24111	NA	100	99.968
S1178	UMIseq	pbmc	57465457	5200160	568268236	259	25232	37320	NA	100	99.4396
S1183	UMIseq	pbmc	49853677	3776614	425805506	751	17812	23907	NA	100	99.96
S1191	UMIseq	pbmc	80367102	1562474	177748100	392	7603	9119	NA	100	99.5917
S1196	UMIseq	pbmc	31841660	2760476	329882261	785	13252	18478	NA	100	99.968
S1205	UMIseq	pbmc	28380911	3086070	375237225	613	14304	21499	NA	100	99.952
S1207	UMIseq	pbmc	30941226	2754360	328094009	820	13177	18490	NA	100	99.968
S1210	UMIseq	pbmc	136830735	7311092	900789400	1462	30227	41280	NA	100	100
S1216	UMIseq	pbmc	27340862	2259658	272054736	658	10841	15183	NA	100	99.952
S1220	UMIseq	pbmc	30128335	3540929	425460950	766	16524	25293	NA	100	99.968
S1221	UMIseq	pbmc	54772251	1010006	115132426	235	4813	5611	NA	100	98.8792
S1225	UMIseq	pbmc	37196976	3594098	435877388	1054	17706	26226	NA	100	100
S1226	UMIseq	pbmc	45606005	4771704	563789436	843	22368	28882	NA	100	99.968
S1242	UMIseq	pbmc	31598785	4260088	501524728	803	20514	33512	NA	100	99.976
S1249	UMIseq	pbmc	80657296	4751878	591789253	1021	20221	28231	NA	100	100
S1252	UMIseq	pbmc	53622098	4872618	465876918	544	21623	31225	NA	100	99.944
S1254	UMIseq	pbmc	34695768	3325624	398920072	969	16150	22757	NA	100	99.992
S1255	UMIseq	pbmc	37983088	3854571	459027886	709	17580	23399	NA	100	99.96
S1260	UMIseq	pbmc	60917504	3368474	421843646	815	14615	17828	NA	100	99.984
S1263	UMIseq	pbmc	45258227	3626250	422891095	667	15397	20697	NA	100	99.96
S1264	UMIseq	pbmc	48737897	3918125	471212894	717	17355	22845	NA	100	99.968
S1265	UMIseq	pbmc	67747458	4388230	526898397	845	19039	25065	NA	100	99.992
S1267	UMIseq	pbmc	33416651	2372116	286450801	722	11319	14953	NA	100	99.968
S1275	UMIseq	pbmc	33003774	2763668	334629111	827	13281	18636	NA	100	99.976
S1278	UMIseq	pbmc	49044191	2402122	279163651	590	11048	14315	NA	100	99.944
S1282	UMIseq	pbmc	45498805	3875992	460114945	873	16504	24051	NA	100	99.984
S1289	UMIseq	pbmc	38361160	3141114	358546267	522	13899	16820	NA	100	99.944
S1294	UMIseq	pbmc	80709338	1195720	137649602	112	5907	7668	NA	100	98.8712
S1295	UMIseq	pbmc	80239946	5691578	535423365	706	24379	36928	NA	100	99.96
S1300	UMIseq	pbmc	51252166	4378118	419164443	499	19370	26847	NA	100	99.944
S1301	UMIseq	pbmc	30632770	3060178	356194463	474	13956	17123	NA	100	99.936
S1304	UMIseq	pbmc	57953787	4544582	568863403	960	20743	30869	NA	100	99.992
S1305	UMIseq	pbmc	33625777	3786404	448776038	706	17890	23075	NA	100	99.96
S1306	UMIseq	pbmc	40351659	2345842	279063645	479	9793	13038	NA	100	99.8879
S1310	UMIseq	pbmc	31303276	3114754	298266451	345	13931	20726	NA	100	99.8799
S1313	UMIseq	pbmc	30095990	2500562	302241190	825	12111	16305	NA	100	99.976
S1314	UMIseq	pbmc	2720376	400286	48864615	87	2053	3858	NA	99.992	97.19
S1315	UMIseq	pbmc	43805446	3296570	378558069	755	15570	21126	NA	100	99.96
S1317	UMIseq	pbmc	63304368	5493070	602055717	254	26767	38970	NA	100	99.4476
S1322	UMIseq	pbmc	47448407	4050657	381625059	450	17683	25325	NA	100	99.9199
S1327	UMIseq	pbmc	20741311	1414804	170145712	370	6674	8837	NA	100	99.7999
S1330	UMIseq	pbmc	32150393	4407556	515379717	783	21016	33967	NA	100	99.968
S1334	UMIseq	pbmc	101770291	7899558	953388163	1378	34654	59249	NA	100	100
S1339	UMIseq	pbmc	34934865	4767510	562333652	687	23085	33234	NA	100	99.96
S1340	UMIseq	pbmc	75322567	1094150	125522394	128	5498	6842	NA	100	98.7751
S1342	UMIseq	pbmc	40892757	3389658	400340833	595	15018	19091	NA	100	99.952
S1347	UMIseq	pbmc	162415211	3985210	464771493	923	16578	21261	NA	100	99.992
S1353	UMIseq	pbmc	36169522	5584482	656886669	892	26820	40658	NA	100	99.984
S1356	UMIseq	pbmc	30446170	2823858	350102230	505	12797	18490	NA	100	99.936
S1362	UMIseq	pbmc	82921349	5478350	564597363	51	25185	33333	NA	99.8559	99.3435
S1367	UMIseq	pbmc	14219903	1557882	191907710	425	7987	11921	NA	100	99.7758
S1373	UMIseq	pbmc	35434766	2963306	353846992	828	14464	19784	NA	100	99.976
S1374	UMIseq	pbmc	38538800	2975522	355054895	802	14297	18995	NA	100	99.968
S1377	UMIseq	pbmc	50720954	1442503	162420745	346	7097	9333	NA	100	99.3675
S1395	UMIseq	pbmc	91158369	5267826	561062068	883	23251	30499	NA	100	99.992
S1397	UMIseq	pbmc	28410103	2443534	294574285	662	11766	16187	NA	100	99.96
S1398	UMIseq	pbmc	64912562	2630580	309034434	552	11980	15416	NA	100	99.944
S1399	UMIseq	pbmc	40077500	4976568	589664233	843	23638	31093	NA	100	99.976
S1400	UMIseq	pbmc	60337691	4055150	476828426	947	19277	25763	NA	100	99.992
S1419	UMIseq	pbmc	52319312	2832253	331613737	783	13114	16684	NA	100	99.96
S1420	UMIseq	pbmc	26815769	2178798	256143524	381	9649	12478	NA	100	99.8559
S1425	UMIseq	pbmc	34169945	5346738	628479719	877	26198	45697	NA	100	99.992
S1427	UMIseq	pbmc	34806387	2976509	352877478	906	14327	18800	NA	100	99.992
S1428	UMIseq	pbmc	66316406	4083366	497584649	849	17417	24659	NA	100	99.984
S1431	UMIseq	pbmc	25272207	3142246	377340135	614	14814	21595	NA	100	99.952
S1433	UMIseq	pbmc	39920050	4138170	415507836	559	18619	24513	NA	100	99.944
S1434	UMIseq	pbmc	158288242	6824039	705035272	1075	29491	39745	NA	100	100
S1435	UMIseq	pbmc	90061765	10227966	1068878225	110	48995	75330	NA	100	99.4716
S1440	UMIseq	pbmc	66085274	1665942	188313276	329	8299	10478	NA	100	99.4076
S1445	UMIseq	pbmc	31261715	4269372	505530308	764	20650	27731	NA	100	99.968
S1448	UMIseq	pbmc	33914723	4877134	585101788	765	23411	35007	NA	100	99.968
S1452	UMIseq	pbmc	79794910	3067200	356585919	614	13662	17425	NA	100	99.952
S1453	UMIseq	pbmc	115102142	7161174	745640212	87	32707	45627	NA	99.9199	99.4236
S1461	UMIseq	pbmc	43804974	3480026	403841559	1002	16194	20946	NA	100	100
S1466	UMIseq	pbmc	42265640	2520982	301569408	715	11586	15678	NA	100	99.968
S1469	UMIseq	pbmc	34634970	857112	95970280	189	4160	5474	NA	100	98.8712
S1470	UMIseq	pbmc	69783466	953773	108326738	97	4687	5760	NA	99.968	98.607
S1473	UMIseq	pbmc	41446532	4900878	580164268	835	23317	29754	NA	100	99.976
S1478	UMIseq	pbmc	48976596	5030448	588197334	410	23208	29418	NA	100	99.5036
S1484	UMIseq	pbmc	53021967	3275134	394114611	1060	15245	20576	NA	100	100
S1487	UMIseq	pbmc	117862836	3934685	416764974	614	17528	22279	NA	100	99.3916
S1490	UMIseq	pbmc	60718094	3814124	456505516	756	16287	21632	NA	100	99.976
S1492	UMIseq	pbmc	106689805	3912096	371548496	529	16377	21884	NA	100	99.4076
S1499	UMIseq	pbmc	36945708	2982478	348492031	626	12681	17509	NA	100	99.944
S1503	UMIseq	pbmc	33432888	3744982	444919031	678	17374	22827	NA	100	99.96
S1506	UMIseq	pbmc	47493154	3573852	424965205	853	17009	22825	NA	100	99.968
S1507	UMIseq	pbmc	122355147	5437036	656644568	1228	22610	29343	NA	100	100
S1512	UMIseq	pbmc	44687140	2998080	347926581	762	14050	18574	NA	100	99.968
S1519	UMIseq	pbmc	37780788	4296368	502698066	712	20186	26041	NA	100	99.96
S1525	UMIseq	pbmc	166833208	5749290	572685688	887	23963	32103	NA	100	99.984
S1527	UMIseq	pbmc	12590750	1234594	149709946	242	6331	9074	NA	100	99.6718
S1531	UMIseq	pbmc	43465016	3751546	448486852	829	16024	24009	NA	100	99.968
S1533	UMIseq	pbmc	30955861	3210080	373301359	149	14810	19412	NA	100	99.2074
S1538	UMIseq	pbmc	64971466	1297648	145608361	266	6587	8104	NA	100	98.0386
S1547	UMIseq	pbmc	2262229	339470	42052345	63	1769	3316	NA	99.968	95.2206
S1548	UMIseq	pbmc	43782487	3381062	409926292	719	15456	20374	NA	100	99.96
S1553	UMIseq	pbmc	39806482	5575138	606969808	123	28442	46451	NA	100	99.2955
S1554	UMIseq	pbmc	48552145	4479495	468757030	617	21620	31144	NA	100	99.8079
S1558	UMIseq	pbmc	87536657	1315796	148327757	114	6373	7851	NA	100	98.9673
S1564	UMIseq	pbmc	35812456	5410981	646114084	934	26287	36707	NA	100	99.992
S1566	UMIseq	pbmc	2239527	321696	40150743	52	1645	3144	NA	99.944	93.6674
S1567	UMIseq	pbmc	34204364	4239306	506399496	782	20266	29916	NA	100	99.984
S1568	UMIseq	pbmc	31787762	3680188	439397286	570	16842	23011	NA	100	99.952
S1569	UMIseq	pbmc	24773379	1675288	194169803	450	7806	10448	NA	100	99.8559
S1571	UMIseq	pbmc	10386964	429302	51040771	176	1903	2544	NA	100	98.3428
S1578	UMIseq	pbmc	36066259	2517136	287430888	518	11773	15879	NA	100	99.9279
S1580	UMIseq	pbmc	34255580	3768242	378496197	514	16751	23803	NA	100	99.944
S1584	UMIseq	pbmc	69658245	4527136	533496218	907	19257	25646	NA	100	99.992
S1585	UMIseq	pbmc	32978680	2611697	311009094	791	12434	16825	NA	100	99.968
S1587	UMIseq	pbmc	55169814	4059451	471742978	923	19122	26198	NA	100	99.984
S1590	UMIseq	pbmc	78984473	7140730	680728074	821	31636	48120	NA	100	99.968
S1603	UMIseq	pbmc	29976309	2544328	299081209	403	11232	13818	NA	100	99.8799
S1610	UMIseq	pbmc	59102873	1126870	125310412	257	5306	6422	NA	100	99.1914
S1611	UMIseq	pbmc	37297916	468214	53311675	38	2260	2770	NA	99.6477	94.2999
S1612	UMIseq	pbmc	61917205	5471058	573681397	820	26257	37381	NA	100	99.9119
S1614	UMIseq	pbmc	30049651	2563030	307712827	722	12312	17338	NA	100	99.968
S1617	UMIseq	pbmc	44347027	4150607	493650475	1193	20012	28498	NA	100	100
S1620	UMIseq	pbmc	40015364	4976576	592848591	887	23959	31198	NA	100	99.984
S1625	UMIseq	pbmc	30413625	2495880	299217524	712	11923	16788	NA	100	99.968
S1629	UMIseq	pbmc	40095896	3758314	390246112	385	17898	25812	NA	100	99.7118
S1636	UMIseq	pbmc	37039137	3168994	370557805	558	14224	19433	NA	100	99.944
S1645	UMIseq	pbmc	82203011	4342986	534496666	913	18171	25400	NA	100	99.992
S1647	UMIseq	pbmc	38832247	3935910	408373947	413	18729	27215	NA	100	99.7038
S1648	UMIseq	pbmc	49601739	5177412	561128230	193	25484	37060	NA	100	99.6317
S1654	UMIseq	pbmc	29254269	3463490	411163848	615	16275	22536	NA	100	99.952
S1657	UMIseq	pbmc	139425135	4144448	438820485	825	18319	23646	NA	100	99.7038
S1658	UMIseq	pbmc	33968106	4026500	481285591	722	18808	26516	NA	100	99.96
S1668	UMIseq	pbmc	37128292	4325012	468276083	134	21668	32775	NA	100	99.1114
S1671	UMIseq	pbmc	52145469	4634718	437752837	514	20276	30320	NA	100	99.944
S1675	UMIseq	pbmc	39654435	4302738	508960189	300	20081	26945	NA	100	99.3756
S1679	UMIseq	pbmc	47942796	4063536	421297357	539	19088	28045	NA	100	99.7518
S1682	UMIseq	pbmc	59629571	1225536	138912314	235	6220	7859	NA	100	97.9105
S1688	UMIseq	pbmc	24133125	1898738	227925756	529	9062	12743	NA	100	99.9279
S1691	UMIseq	pbmc	22124997	2383668	293278611	467	11053	15573	NA	100	99.8959
S1692	UMIseq	pbmc	43859304	2975306	341425264	702	13886	17896	NA	100	99.96
S1696	UMIseq	pbmc	72418013	1396900	159087464	291	7139	9157	NA	100	98.0866
S1697	UMIseq	pbmc	68988520	4880898	505863400	741	22644	32008	NA	100	99.8639
S1715	UMIseq	pbmc	55135701	5717736	675135084	1112	26430	33859	NA	100	100
S1717	UMIseq	pbmc	38926777	3545568	413712660	601	15760	20171	NA	100	99.952
S1722	UMIseq	pbmc	32545045	3622096	360740423	480	16280	22445	NA	100	99.936
S1723	UMIseq	pbmc	66207199	5571110	579734933	328	26334	36840	NA	100	99.7518
S1725	UMIseq	pbmc	26271827	2129216	256549674	601	10233	14347	NA	100	99.944
S1728	UMIseq	pbmc	75525839	4024374	482392920	826	17047	22187	NA	100	99.984
S1735	UMIseq	pbmc	36427963	4911512	581359977	811	23167	33157	NA	100	99.968
S1745	UMIseq	pbmc	32812854	2582181	310950530	682	12407	16996	NA	100	99.96
S1746	UMIseq	pbmc	31800539	2603766	308338751	779	12557	17246	NA	100	99.968
S1747	UMIseq	pbmc	44886916	3004848	351157082	526	13014	16198	NA	100	99.944
S1748	UMIseq	pbmc	70079498	5701896	578936280	816	24847	36192	NA	100	99.968
S1749	UMIseq	pbmc	14285095	1649139	201601090	334	8402	13699	NA	100	99.7678
S1753	UMIseq	pbmc	95913156	5762894	712215567	1204	24608	35880	NA	100	100
S1754	UMIseq	pbmc	70635844	3866500	485707027	707	15873	22181	NA	100	99.976
S1758	UMIseq	pbmc	47008882	3502670	421090103	610	15843	21775	NA	100	99.944
S1759	UMIseq	pbmc	23075186	2200912	256487732	627	10551	14896	NA	100	99.952
S056	DuplexSeq	pbmc	1606253	71314	9105426	34	336	474	100	99.2887	NA
S151	DuplexSeq	pbmc	NA	47642	6146401	16	221	382	100	98.5128	NA
S181	DuplexSeq	pbmc	2723677	12418	1623132	6	55	101	99.7801	0.0129	NA
S413	DuplexSeq	pbmc	2825208	78404	10182630	27	362	493	100	97.7239	NA
S528	DuplexSeq	pbmc	3262243	38750	5011911	6	186	313	99.7608	86.8219	NA
S679	DuplexSeq	pbmc	2936934	74688	9664371	41	320	431	100	99.0042	NA
S743	DuplexSeq	pbmc	3684136	104366	13509369	60	439	588	100	99.6767	NA
S780	DuplexSeq	pbmc	3246276	101310	13161186	46	430	570	100	98.9395	NA
S782	DuplexSeq	pbmc	1556159	58118	7415232	13	280	400	100	97.6269	NA
S785	DuplexSeq	pbmc	1512032	56398	7199592	26	268	413	100	98.0213	NA
S840	DuplexSeq	pbmc	2771360	14796	1935000	5	66	120	99.8254	3.1943	NA
S1186	DuplexSeq	pbmc	4239211	102304	13243296	45	423	560	100	99.6444	NA
S1414	DuplexSeq	pbmc	1335787	57058	7402002	15	268	375	100	96.3401	NA
S1441	DuplexSeq	pbmc	2319839	109996	14030286	49	507	705	100	99.7284	NA
S1447	DuplexSeq	pbmc	4232668	102856	13310706	52	429	578	100	99.6508	NA
S1467	DuplexSeq	pbmc	2679789	75756	9839616	16	353	505	100	97.4523	NA
S1581	DuplexSeq	pbmc	2025317	81144	10352232	26	380	547	100	99.0947	NA
S1589	DuplexSeq	pbmc	2075956	93498	12248070	50	370	788	100	99.8707	NA
S1686	DuplexSeq	pbmc	756954	30048	3742388	7	158	262	99.9418	83.246	NA
S234	UMIseq	synthetic	33902104	6342812	431144406	627	18480	20687	NA	100	99.9871
S309	UMIseq	synthetic	58361633	8918328	612501568	939	26331	29089	NA	100	99.9935
S657	UMIseq	synthetic	44539742	6299068	425180100	529	18155	19790	NA	100	99.9806
S678	UMIseq	synthetic	48329818	8403850	573918560	825	24532	28102	NA	100	99.9935
S852	UMIseq	synthetic	38430903	6242240	399192377	442	16763	21807	NA	100	99.9806
S1233	UMIseq	synthetic	40817306	7461326	508250341	798	21768	25226	NA	100	99.9935
S1319	UMIseq	synthetic	39421242	6464474	440346637	658	18771	20958	NA	100	99.9871
S1385	UMIseq	synthetic	34298752	6023290	412412329	558	17760	19937	NA	100	99.9871
S003	WGS	tumor	1979093142	1979093142	287898821825	NA	47	NA	96.8375	10.2852	NA
S033	WGS	tumor	2075387324	2075387324	301078509453	NA	41	NA	96.3004	14.7741	NA
S039	WGS	tumor	2229007006	2229007006	322637405436	NA	50	NA	96.8518	12.1914	NA
S068	WGS	tumor	1769105528	1769105528	256741596117	NA	40	NA	96.2196	7.1747	NA
S244	WGS	tumor	2088903622	2088903622	306169606482	NA	63	NA	96.3551	6.8997	NA
S273	WGS	tumor	2014094802	2014094802	291905473118	NA	37	NA	96.4774	14.5398	NA
S298	WGS	tumor	1827848384	1827848384	272140431029	NA	74	NA	96.8787	15.5217	NA
S684	WGS	tumor	1765741148	1765741148	257571163459	NA	27	NA	94.1311	14.2456	NA
S352	WGS	tumor	2370301358	2370301358	349259504398	NA	67	NA	96.444	17.9334	NA
S928	WGS	tumor	2100163670	2100163670	308333025457	NA	55	NA	96.9624	13.3435	NA
S950	WGS	tumor	2068879328	2068879328	303675477583	NA	62	NA	96.4322	7.8362	NA
S127	WGS	tumor	2046744228	2046744228	304555953714	NA	85	NA	96.5939	20.043	NA
S1004	WGS	tumor	2290055554	2290055554	329431585401	NA	46	NA	96.7272	14.4783	NA
S850	WGS	tumor	1807785866	1807785866	261492401846	NA	35	NA	96.1107	11.4697	NA
S1116	WGS	tumor	1874351320	1874351320	271355032613	NA	30	NA	95.894	14.4489	NA
S688	WGS	tumor	1980891688	1980891688	294890498096	NA	81	NA	96.5849	14.5156	NA
S1253	WGS	tumor	1830444434	1830444434	258526913973	NA	35	NA	95.9675	7.3748	NA
S923	WGS	tumor	2168901800	2168901800	314383720121	NA	47	NA	96.8079	12.5921	NA
S208	WGS	tumor	2233646788	2233646788	332629325294	NA	94	NA	96.6029	41.6834	NA
S137	WGS	tumor	1711444642	1711444642	249213494385	NA	45	NA	96.794	5.7256	NA
S135	WGS	tumor	2233741636	2233741636	326489906510	NA	48	NA	96.3885	17.1623	NA
S013	WGS	tumor	1703511330	1703511330	253427793938	NA	70	NA	97.0335	6.1032	NA
S1465	WGS	tumor	2652740508	2652740508	387537619178	NA	58	NA	96.4749	21.8575	NA
S010	WES	tumor	171524508	152348469	21544053539	0	190	3539	98.7945	95.1222	NA
S019	WES	tumor	41718528	37219644	4964118929	0	47	735	98.1182	2.8658	NA
S024	WES	tumor	68543738	61524269	8381660087	0	73	1423	98.5384	17.7376	NA
S027	WES	tumor	196919546	158470243	19850251387	0	157	3123	98.3638	84.4848	NA
S031	WES	tumor	136091644	121645984	15184400695	0	109	2135	98.5743	56.3938	NA
S051	WES	tumor	148014188	124793443	17862625909	0	165	3277	98.634	89.3541	NA
S064	WES	tumor	129682858	112625139	16106112278	0	151	2548	98.5993	87.8246	NA
S067	WES	tumor	178201890	155269019	20897254725	0	146	3333	98.5372	83.5267	NA
S084	WES	tumor	114239160	102534434	14591697000	0	137	2426	98.4799	80.859	NA
S085	WES	tumor	43483626	39812397	5424045276	0	47	860	97.9102	7.396	NA
S091	WES	tumor	209037188	170614146	24541680955	0	200	5020	98.8321	93.3271	NA
S093	WES	tumor	167684990	146312766	20967761163	0	196	3960	98.7806	94.6585	NA
S102	WES	tumor	48532436	45009663	6238200910	0	51	1285	98.4801	6.1679	NA
S105	WES	tumor	112682400	100517849	13531180927	0	114	2188	98.7582	61.7571	NA
S110	WES	tumor	59397092	54838175	7607978918	0	64	1501	98.6286	13.1884	NA
S113	WES	tumor	69512470	58180613	6982658238	0	57	1472	98.1294	16.308	NA
S115	WES	tumor	182190244	145126899	19371985035	0	132	3137	98.4271	78.682	NA
S116	WES	tumor	214824980	185997328	25356771163	0	165	3550	98.6958	83.1489	NA
S125	WES	tumor	129364774	115938990	16456759310	0	143	3652	98.2566	82.196	NA
S128	WES	tumor	303352880	226001727	28593060170	0	200	5011	98.4899	95.9501	NA
S131	WES	tumor	239835668	196317246	25545765601	0	148	3922	98.5128	79.3019	NA
S132	WES	tumor	228611196	152130028	21917544478	0	190	3946	98.667	95.6439	NA
S149	WES	tumor	37197662	34484630	4789275685	0	46	1274	98.4388	1.3611	NA
S167	WES	tumor	189399100	159148687	22075596488	0	99	3499	98.5525	49.9333	NA
S168	WES	tumor	133455690	115300147	16358172625	0	148	2962	98.6591	84.1698	NA
S173	WES	tumor	144870084	128346699	17379690347	0	79	2221	98.4343	32.5783	NA
S183	WES	tumor	154410148	133593811	17971702436	0	87	4012	98.4282	40.4013	NA
S082	WES	tumor	88764820	76715416	10783010446	0	94	1889	98.6789	45.8039	NA
S190	WES	tumor	77036244	68687144	9022539439	0	78	2084	98.4174	31.4305	NA
S191	WES	tumor	83975390	72671336	9479558008	0	71	1794	98.3098	29.1827	NA
S195	WES	tumor	143638184	116319329	16253780253	0	149	2871	98.6014	82.9171	NA
S200	WES	tumor	83791040	75960889	8997682119	0	66	1576	98.2221	24.5541	NA
S202	WES	tumor	33895326	31446481	4343010667	0	41	942	98.1208	1.3631	NA
S214	WES	tumor	61406082	55940402	7781672930	0	65	1583	98.5383	15.4892	NA
S215	WES	tumor	89547508	77567774	9018439138	0	66	1471	98.1713	22.8701	NA
S217	WES	tumor	143065586	127577907	17160905437	0	79	5047	98.5238	31.8775	NA
S219	WES	tumor	148752058	105444523	12567848613	0	86	2118	98.1443	41.2934	NA
S222	WES	tumor	75771926	66690438	8686236485	0	48	2587	98.3018	19.3673	NA
S225	WES	tumor	91197320	81235296	11312578875	0	101	2614	98.6955	51.3778	NA
S231	WES	tumor	123711028	109501125	15521926922	0	144	2345	98.5097	84.1489	NA
S233	WES	tumor	90144568	79290992	10838082889	0	89	2256	98.3901	40.6585	NA
S230	WES	tumor	45108360	41386504	5744282983	0	56	1409	98.4666	3.9444	NA
S240	WES	tumor	98840998	85657560	12438721092	0	108	2478	98.7662	58.9636	NA
S259	WES	tumor	64738502	58756004	8176880392	0	70	1305	98.5626	17.2162	NA
S270	WES	tumor	44195506	40349278	5526965191	0	50	1212	98.4892	3.2939	NA
S284	WES	tumor	76195074	68345844	8978075174	0	70	1906	98.3993	23.5625	NA
S249	WES	tumor	174053010	147381077	21277463246	0	199	3758	98.6842	95.9405	NA
S293	WES	tumor	66758986	58029068	7558945925	0	63	1615	98.3402	13.3001	NA
S294	WES	tumor	175133974	157765742	22372273279	0	198	4406	98.8208	95.3688	NA
S295	WES	tumor	60336710	55526304	7713756706	0	65	1335	98.5251	14.1909	NA
S296	WES	tumor	155952790	127133152	13379353989	0	102	1990	98.095	51.8991	NA
S301	WES	tumor	27732276	25150497	3465392642	0	32	921	96.8163	0.2642	NA
S313	WES	tumor	60862956	55868379	7794675807	0	77	1464	98.4215	22.1067	NA
S315	WES	tumor	114493058	88345054	9976179111	0	44	2772	98.102	15.1519	NA
S318	WES	tumor	136234948	103107029	12923267025	0	86	3097	98.2575	40.8397	NA
S320	WES	tumor	65526280	60326630	8371311625	0	69	1906	98.6676	19.8237	NA
S331	WES	tumor	50730482	47045150	6537544320	0	63	1342	98.4511	10.5715	NA
S337	WES	tumor	86331150	78203147	10982389608	0	96	2132	98.5866	45.902	NA
S343	WES	tumor	194497066	176377038	23831750555	0	200	3476	98.6311	95.5424	NA
S356	WES	tumor	57178608	52431043	7293276913	0	71	1518	98.3994	18.62	NA
S359	WES	tumor	54718230	48169063	6175068886	0	52	1220	98.1967	3.9233	NA
S360	WES	tumor	118075376	107583987	14848405648	0	122	3147	98.0965	68.4793	NA
S363	WES	tumor	272997606	237422045	33831391950	0	200	5496	98.8294	97.5254	NA
S372	WES	tumor	304010416	259636983	36158031761	0	200	6298	98.7736	97.784	NA
S377	WES	tumor	69540476	62781735	8822044146	0	78	1756	98.3217	25.9666	NA
S384	WES	tumor	61465874	39946818	4759714281	0	33	1106	97.4913	6.4667	NA
S387	WES	tumor	63978580	57541641	7993729673	0	69	1379	98.517	13.4977	NA
S280	WES	tumor	79091222	69273482	9443580413	0	81	1465	98.4469	27.6971	NA
S220	WES	tumor	122350544	110198830	15636057102	0	145	2987	98.6258	83.0543	NA
S256	WES	tumor	119940870	110342176	15523454290	0	129	3954	98.6229	71.4663	NA
S403	WES	tumor	113476654	103074736	14181619413	0	115	2518	97.9774	62.1943	NA
S422	WES	tumor	85348762	75195223	10243079307	0	87	1976	98.5359	36.2287	NA
S427	WES	tumor	376581966	276262419	34920662977	0	200	5518	98.5264	96.6383	NA
S435	WES	tumor	180497238	161829083	22223994315	0	79	6545	98.4366	39.6006	NA
S436	WES	tumor	378919460	316467498	44621553743	0	200	4882	98.8164	97.865	NA
S441	WES	tumor	48111754	44567085	6179078356	0	59	1175	98.4856	7.5982	NA
S442	WES	tumor	105896020	93754621	12341015286	0	76	2059	98.4281	30.0651	NA
S447	WES	tumor	206058622	167624877	19312982610	0	143	3138	98.3093	75.7721	NA
S448	WES	tumor	53845080	49353941	6879213159	0	67	1251	98.513	13.9579	NA
S449	WES	tumor	221429196	171789742	22418002775	0	145	5078	98.5726	79.9847	NA
S460	WES	tumor	141553304	121626900	14551178182	0	96	2694	98.2997	46.8312	NA
S470	WES	tumor	59792362	54187506	7607787456	0	67	1561	98.3121	14.0943	NA
S269	WES	tumor	44183596	40435273	5645778425	0	56	1098	98.3443	4.4522	NA
S490	WES	tumor	34650938	31425822	4299593842	0	39	937	97.9206	1.3002	NA
S495	WES	tumor	117309420	102489155	14430578676	0	127	3462	98.6359	72.0669	NA
S503	WES	tumor	201426314	181437057	25541016114	0	200	4919	98.7741	94.9989	NA
S299	WES	tumor	198039434	169315012	23227062413	0	63	6519	98.4549	31.0452	NA
S385	WES	tumor	50976694	44341462	5404749695	0	41	1291	95.2762	13.8248	NA
S187	WES	tumor	50594148	46820664	6513009612	0	63	1383	98.3944	10.9191	NA
S521	WES	tumor	87469070	76587515	10617409310	0	81	2962	97.9342	32.6001	NA
S526	WES	tumor	153437460	122675902	15349273255	0	116	2584	98.3377	64.015	NA
S529	WES	tumor	68544000	63976689	9039521094	0	76	1842	98.5957	23.3844	NA
S541	WES	tumor	47149494	43271252	5980367705	0	58	1373	98.5559	5.8702	NA
S546	WES	tumor	69981500	58790194	7263094647	0	53	1802	97.1164	8.9727	NA
S552	WES	tumor	270881054	220972445	28692462322	0	200	4020	98.6407	96.6243	NA
S558	WES	tumor	124923728	107764898	15362194063	0	134	2678	98.661	73.3666	NA
S562	WES	tumor	72315860	65012693	9139933405	0	78	1691	98.4461	28.2556	NA
S076	WES	tumor	124941716	109110518	14850520267	0	128	2628	98.6278	74.1679	NA
S566	WES	tumor	260607910	212188385	28548158520	0	135	8501	98.5559	76.4139	NA
S575	WES	tumor	77281908	68824025	9674390520	0	79	1673	98.6472	30.3861	NA
S335	WES	tumor	56277050	51531772	7192359259	0	70	1509	98.4202	15.9031	NA
S265	WES	tumor	151256270	139382612	19515566360	0	164	4048	98.7411	85.4827	NA
S582	WES	tumor	148990848	128054976	18372338971	0	172	2984	98.721	92.7366	NA
S589	WES	tumor	181743544	163795284	23563103800	0	200	3856	98.8258	96.8663	NA
S599	WES	tumor	164109198	146865504	20799857021	0	176	3432	98.797	91.6552	NA
S600	WES	tumor	55573016	51161314	7143740892	0	71	1811	98.4595	13.036	NA
S603	WES	tumor	157534502	141275492	20029550102	0	172	2979	98.6854	91.8237	NA
S610	WES	tumor	56015768	49349082	6434368185	0	52	1139	98.091	7.3568	NA
S307	WES	tumor	120543254	108017443	14356071412	0	123	2038	98.6241	69.7101	NA
S617	WES	tumor	60978214	56211354	7861941898	0	67	1555	98.5521	15.0701	NA
S623	WES	tumor	87646642	80853888	10801773182	0	99	2360	98.4152	49.5318	NA
S628	WES	tumor	125950126	107935847	15386731228	0	130	2311	98.7126	70.4245	NA
S344	WES	tumor	59708430	54548089	7638233223	0	67	1355	98.4902	14.7413	NA
S634	WES	tumor	59657144	55131576	7681493258	0	77	2075	98.5388	20.5722	NA
S644	WES	tumor	67225394	61251707	8487921141	0	78	1774	98.6374	23.125	NA
S292	WES	tumor	89633314	82201513	10540096052	0	95	2040	98.3443	46.5713	NA
S155	WES	tumor	144273232	125702325	17315135616	0	143	3806	98.7007	79.2082	NA
S651	WES	tumor	466247932	383969271	55883580830	0	200	10394	98.8586	98.347	NA
S654	WES	tumor	34788772	32110323	4387984065	0	39	1139	97.7347	2.4152	NA
S655	WES	tumor	58870030	53814351	7469803138	0	63	1111	98.6062	12.0085	NA
S660	WES	tumor	60188694	55531827	7725182558	0	65	1353	98.6423	12.9953	NA
S664	WES	tumor	225028530	203984033	28751387594	0	200	8446	98.8311	92.5009	NA
S666	WES	tumor	146191316	129941441	18304501511	0	159	3972	98.4462	85.8521	NA
S671	WES	tumor	27111426	24790256	3416270373	0	31	728	97.7238	0.0907	NA
S656	WES	tumor	40332642	36192232	5147404836	0	45	967	98.1013	1.6917	NA
S641	WES	tumor	196718592	158130576	22305966497	0	193	3768	98.6533	93.8558	NA
S680	WES	tumor	126876468	111227919	14298573430	0	114	2818	98.5692	60.2236	NA
S689	WES	tumor	77385408	70003240	9447190807	0	79	1793	98.5165	29.8696	NA
S690	WES	tumor	270734130	188290159	21311299047	0	123	3168	98.2265	64.9512	NA
S702	WES	tumor	52648008	47916395	6604663661	0	60	1487	98.4646	5.8979	NA
S643	WES	tumor	123391526	108529586	15350200696	0	129	2707	98.622	70.2255	NA
S511	WES	tumor	132034630	117439637	15446216200	0	70	2386	98.3328	29.7437	NA
S098	WES	tumor	77232590	67884948	9201564140	0	80	1561	98.4184	25.7137	NA
S733	WES	tumor	319733010	274851733	34748716582	0	156	6690	98.5242	84.8982	NA
S104	WES	tumor	65976402	59541675	8215960431	0	76	2352	98.6179	22.572	NA
S736	WES	tumor	50903214	35240891	4325372971	0	33	712	97.4601	2.025	NA
S737	WES	tumor	50844540	47030538	6527431203	0	55	1535	98.4163	7.1708	NA
S744	WES	tumor	58988232	54053720	7497849977	0	63	1912	98.4834	15.5301	NA
S745	WES	tumor	37363114	34245243	4722979708	0	44	959	98.2378	2.9771	NA
S746	WES	tumor	41980188	38985235	5444514310	0	54	1292	98.3576	2.7663	NA
S440	WES	tumor	80436710	68254971	8598279396	0	29	6390	96.7613	13.1599	NA
S761	WES	tumor	81517256	72259937	10128374995	0	86	1899	98.5468	35.0692	NA
S768	WES	tumor	108099548	94423598	12698899356	0	69	1820	98.4166	34.0206	NA
S070	WES	tumor	45656058	41654756	5681226657	0	50	1274	98.3339	4.3044	NA
S175	WES	tumor	108017996	92702314	13447653790	0	115	2876	98.6929	63.8668	NA
S776	WES	tumor	314411558	244187795	33108295259	0	200	6767	98.6943	95.2988	NA
S556	WES	tumor	110917018	97807152	12402527616	0	102	2213	98.4881	52.665	NA
S800	WES	tumor	273285618	221570613	22903925882	0	179	3505	98.3612	79.9378	NA
S080	WES	tumor	67770306	59593162	7644698709	0	64	2140	98.1638	22.4273	NA
S819	WES	tumor	310304336	193983944	23876354214	0	137	2524	98.4949	76.7099	NA
S832	WES	tumor	107778650	96322685	13592341158	0	112	2646	98.5605	63.5486	NA
S833	WES	tumor	164343882	145723807	20596657766	0	181	3793	98.6461	91.8739	NA
S581	WES	tumor	33356202	28948066	4011498493	0	36	851	97.6805	0.8821	NA
S844	WES	tumor	357960150	275707846	37655649985	0	200	14955	98.6549	96.8451	NA
S851	WES	tumor	69098846	62176982	8512415484	0	77	1655	98.5375	24.6026	NA
S854	WES	tumor	125826348	93272678	9513171753	0	59	1257	97.9396	23.4454	NA
S677	WES	tumor	248558760	204867236	29731715275	0	200	5522	98.7805	97.5538	NA
S028	WES	tumor	127344672	113664611	15107538032	0	124	2723	98.5108	68.9657	NA
S759	WES	tumor	321617788	244933407	33918130334	0	200	5959	98.7119	96.3374	NA
S157	WES	tumor	100714290	85445335	12251349682	0	112	2255	98.6991	63.2316	NA
S459	WES	tumor	35145108	30539569	4176927576	0	37	964	97.7778	0.9527	NA
S884	WES	tumor	125502182	115143071	15993079660	0	159	3513	98.5419	89.0173	NA
S604	WES	tumor	134055946	116572433	15255631207	0	104	2831	98.4993	53.2001	NA
S889	WES	tumor	198259256	156254192	18485756284	0	124	2956	98.3772	69.0779	NA
S058	WES	tumor	199537990	173496290	21323721711	0	147	4348	98.4923	78.7425	NA
S902	WES	tumor	224100462	195109605	27518607241	0	200	6097	98.1381	91.3628	NA
S906	WES	tumor	58933718	48953590	5383599316	0	42	894	96.5869	3.1495	NA
S909	WES	tumor	166666448	148392019	21022230129	0	185	3995	98.8098	94.4136	NA
S911	WES	tumor	95631026	88228828	11795114712	0	108	2601	98.4342	57.7943	NA
S912	WES	tumor	75550988	67637761	9025396977	0	68	3237	98.5294	21.0048	NA
S848	WES	tumor	41656994	36080338	3778364478	0	27	1035	91.0996	1.6781	NA
S707	WES	tumor	222501814	177579112	22692176842	0	131	5353	98.4817	75.102	NA
S806	WES	tumor	221052740	187628638	26689135529	0	200	4562	98.8373	96.7461	NA
S111	WES	tumor	59888566	55046754	7613839841	0	64	1380	98.6274	12.1195	NA
S245	WES	tumor	278807582	241505548	33633521007	0	200	4237	98.7333	97.2453	NA
S921	WES	tumor	184731240	167072245	23481320140	0	194	4774	98.7038	91.2074	NA
S769	WES	tumor	91843354	73594253	7948272613	0	44	4199	97.6493	12.095	NA
S937	WES	tumor	121499934	109168241	14339319874	0	102	2729	98.5238	52.3771	NA
S938	WES	tumor	144295970	131972212	18521880331	0	156	2588	98.7356	82.549	NA
S942	WES	tumor	48312224	44648422	5939865354	0	54	1217	98.4722	3.4322	NA
S953	WES	tumor	187099020	158312618	19280549256	0	140	2756	98.4302	73.7137	NA
S130	WES	tumor	387800878	297169893	40778860992	0	187	8866	98.6481	89.6954	NA
S964	WES	tumor	132525304	114325275	16475655293	0	153	3080	98.6197	89.0406	NA
S756	WES	tumor	392037982	315118986	36673742036	0	200	6773	98.4544	85.0789	NA
S971	WES	tumor	34677412	30129477	3562011849	0	29	1084	90.3676	2.0932	NA
S718	WES	tumor	61037616	53803030	6949188289	0	56	1601	98.3056	10.465	NA
S977	WES	tumor	253884206	178352600	25440605390	0	200	4772	98.8075	96.2021	NA
S642	WES	tumor	63847538	58229759	8101089868	0	69	1803	98.5699	15.9142	NA
S982	WES	tumor	153300178	132566832	19018600471	0	174	3010	98.6255	92.8924	NA
S704	WES	tumor	94142122	81827819	9130238239	0	53	3488	98.0269	19.9848	NA
S047	WES	tumor	37240620	34245842	4690774376	0	43	1006	98.2221	2.4617	NA
S1015	WES	tumor	161811678	147420028	21196060352	0	194	3916	98.7731	93.402	NA
S1023	WES	tumor	176481184	157894256	22361373333	0	195	4947	98.8119	95.1031	NA
S975	WES	tumor	53384160	44729024	5286699195	0	41	1130	96.4744	3.3271	NA
S967	WES	tumor	248283046	204947185	29111760019	0	200	5838	98.7624	97.0629	NA
S897	WES	tumor	29169528	26704164	3694321783	0	33	878	97.9551	0.1187	NA
S519	WES	tumor	102489786	89474100	12016797833	0	78	1700	98.4362	37.0922	NA
S741	WES	tumor	69679916	65101063	9135592253	0	76	2093	98.6201	27.6954	NA
S407	WES	tumor	247198988	178812224	20506428565	0	157	4424	98.2614	82.077	NA
S1061	WES	tumor	48224274	44246233	6144928293	0	51	1116	98.5034	5.3468	NA
S1062	WES	tumor	227382076	201902515	26344666158	0	142	4451	98.6111	80.5814	NA
S958	WES	tumor	326250628	260024861	37567615009	0	200	7621	98.9026	98.096	NA
S480	WES	tumor	51471770	45762314	5819736449	0	47	1336	98.0304	2.9579	NA
S1080	WES	tumor	92819648	80126757	11332693866	0	92	1799	98.554	40.6294	NA
S584	WES	tumor	214970622	163749217	20430906145	0	143	3903	98.4987	76.8545	NA
S868	WES	tumor	267700904	226691553	29050211700	0	163	3830	98.5666	81.2405	NA
S1055	WES	tumor	119534398	104494536	14897936823	0	138	2808	98.7779	81.3624	NA
S965	WES	tumor	124488622	115062081	16160801516	0	137	3981	98.6603	75.7608	NA
S071	WES	tumor	82439000	74231587	10158364574	0	85	1587	98.5962	36.3052	NA
S308	WES	tumor	307248110	257986117	33985138067	0	200	4323	98.5919	95.8391	NA
S803	WES	tumor	290269202	226739678	31027365887	0	200	6228	98.6416	95.7309	NA
S1120	WES	tumor	209504446	178172564	24082346942	0	108	4194	98.506	54.5586	NA
S201	WES	tumor	99094966	87224905	11471091826	0	90	1740	98.4136	39.9372	NA
S1142	WES	tumor	71745900	64373725	8649533757	0	70	1212	98.3505	18.3043	NA
S908	WES	tumor	242828988	208880006	28142000983	0	127	4856	98.6421	68.168	NA
S1144	WES	tumor	47586976	42567391	5828808111	0	52	1397	98.3536	5.1991	NA
S1150	WES	tumor	188971194	156817283	22389893552	0	200	3690	98.6599	96.3957	NA
S227	WES	tumor	55655700	48638845	6290910107	0	25	1905	93.2451	14.1928	NA
S591	WES	tumor	128540390	112741752	15227404660	0	91	2767	98.5776	42.7739	NA
S478	WES	tumor	176362360	149195404	20570912910	0	142	3676	98.6316	83.7237	NA
S1172	WES	tumor	60379618	53630934	7336436225	0	67	1435	98.5012	12.4058	NA
S870	WES	tumor	90943772	83685199	11144731034	0	102	2386	98.4245	52.2508	NA
S1182	WES	tumor	94483446	84165113	11663595624	0	98	2147	98.7406	48.7422	NA
S1187	WES	tumor	65153292	60962233	8639133824	0	71	1855	98.4457	21.31	NA
S383	WES	tumor	196280474	139095096	15969843592	0	118	3281	98.2995	64.3535	NA
S243	WES	tumor	34106630	31539152	4381092822	0	42	1027	98.3025	0.9154	NA
S869	WES	tumor	60742592	55053436	7641284977	0	65	1355	98.597	12.5542	NA
S1097	WES	tumor	262414784	198295878	25453840229	0	200	3857	98.6137	92.0442	NA
[truncated: 145 more rows]
